# Supplementary material for: ACE Phenotyping in Human Blood and Tissues: Revelation of ACE Outliers and Sex Differences in ACE Sialylation
Source: MDPI journal article supplement (doi:10.3390/biomedicines12050940), 2024-04-23
Supplement: s1 [file s1]

## **SUPPLEMENTARY MATERIALS.**

### **ACE phenotyping in human blood and tissues: Revelation of ACE outliers and sex differences in ACE sialylation**

**Enikő Edit Enyedi<sup>1,2</sup>, Pavel A. Petukhov<sup>3</sup>, Alexander J. Kozuch<sup>4</sup>, Steven M. Dudek<sup>4</sup>, Attila Toth<sup>1</sup>, Miklós Fagyas<sup>1,\*</sup> and Sergei M. Danilov<sup>4,\*</sup>**

<sup>1</sup>Division of Clinical Physiology, Department of Cardiology, University of Debrecen, 22 Moricz Zs, 4032 Debrecen, Hungary

<sup>2</sup>Kálmán Laki Doctoral School of Biomedical and Clinical Sciences, University of Debrecen, Hungary.

<sup>3</sup>Department of Pharmaceutical Sciences, College of Pharmacy, University of Illinois at Chicago, 833 S Wood St, Chicago, IL 60612, USA

<sup>4</sup>Department of Medicine, Division of Pulmonary, Critical Care, Sleep and Allergy, University of Illinois at Chicago, CSB 915, MC 719, 840 S. Wood Ave., Chicago, IL 60612, USA

\* Correspondence: authors: [danilov@uic.edu](mailto:danilov@uic.edu); +1\_(708)-642-0635, [fagyasmiklos@med.unideb.hu](mailto:fagyasmiklos@med.unideb.hu)

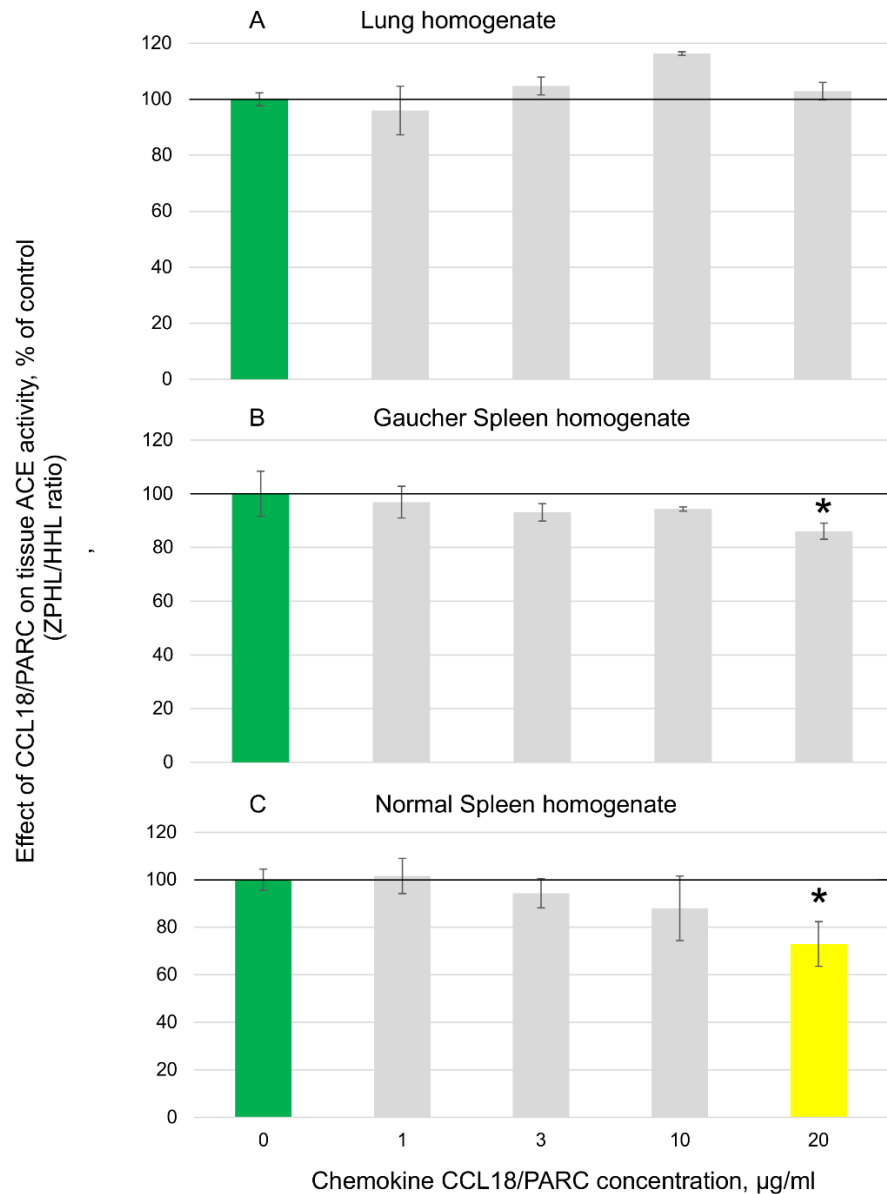

**Figure S1. Effect of chemokine CCL18 on catalytic properties of human tissue ACEs.**

**A-C.** Lung (A) and spleen (B-C) homogenates from patient with Gaucher's disease (B) and normal spleen (C) were titrated with different concentration of CCL18. After equilibration, ACE activity was determined with fluorometric assay with two substrates (ZPHL and HHL). Data expressed as a % of ZPHL/HHL ratio from control (without CCL18).

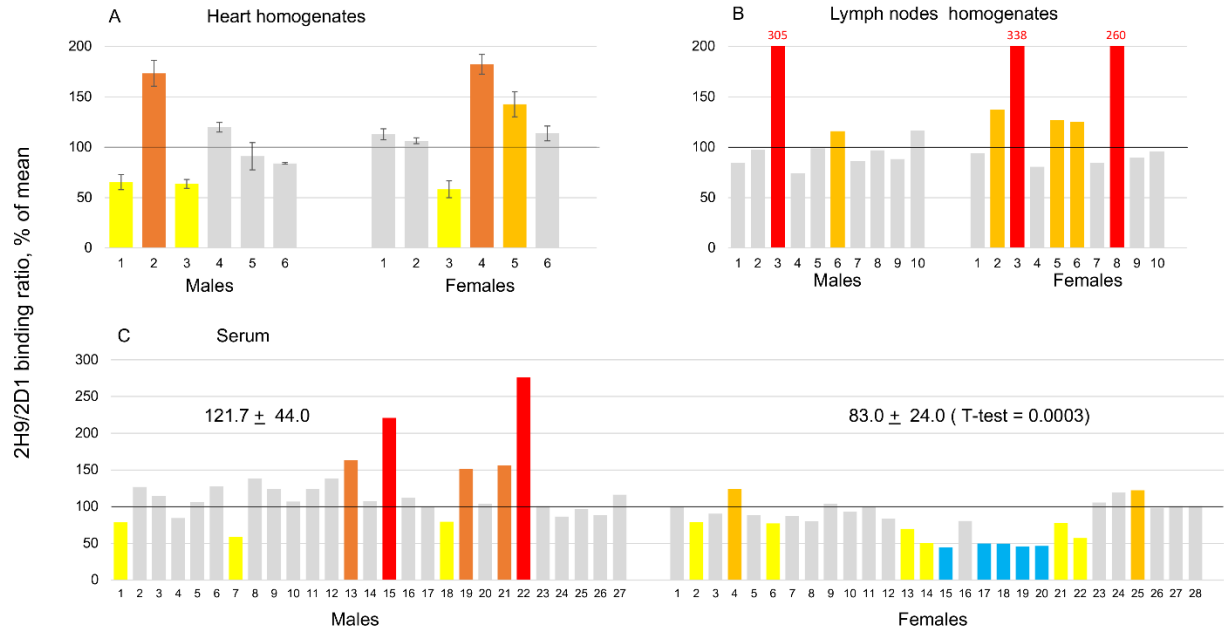

**Fig. S2. Gender-specific precipitation of ACE activity from male and female sera samples.**

ACE activity was precipitated from heart homogenates of 6 males and 6 females (**A**), from lymph nodes homogenates of 10 males and 10 females (**B**) and from 27 male and 28 female sera samples (**C**) by mAbs 2D1 and 2H9, having epitopes on the N and C domains, respectively [Popova, 2021, Kozuch, 2022]. 2H9/2D1 ratios were expressed as % from mean of each tissue set. Mean values from 2-3 experiments (each made in triplicates)  $\pm$  SD. Red bars on Fig.S2 are represent homogenates of lymph node from unrelated patients (with very low ACE activity), whereas others -from patients with sarcoidosis (and relatively high ACE activity).

Table S1. **Whole exome sequencing analysis of patient S13 (LM1).**

| <b>Parameter</b>         | <b>Index Patient S13</b> |
|--------------------------|--------------------------|
| ## altered genes         | 11962                    |
| ## genetic mutations     | 214698                   |
| <b>Mutations by Type</b> |                          |
| nonsynonymous            | 10722                    |
| frameshifting            | 246                      |
| stop-loss                | 12                       |
| stop-gain                | 103                      |
| synonymous               | 11528                    |
| inframe                  | 392                      |
| in noncoding RNA         | 1805                     |
| unknown SNP              | 277                      |
| Unknown InDel            | 21                       |
| damaging variants        | 1382                     |
|                          |                          |
| ACE mutations            | 0                        |

Table S2. **All damaging mutations in the genes of Index Patient S13 (Attached Below)**

Table S3. List of 17 patients with WES, which ACE phenotype was determined.

| #                           | Patient ID                  | Phenotype       | Origin   | Year | ACE Mutations                 | Variants in other genes |             |
|-----------------------------|-----------------------------|-----------------|----------|------|-------------------------------|-------------------------|-------------|
|                             |                             |                 |          |      |                               | SNP                     | Stop/Indels |
|                             | Index Patient<br><b>S13</b> | ACE outlier     | Debrecen | 2022 | None                          | 1381                    | 742         |
| Candidates for subtractions |                             |                 |          |      |                               |                         |             |
| 1                           | <b>90B</b> [14]             | Low ACE         | Moscow   | 2019 | <b>Y215C</b><br>rs3730025     | 1388                    | 617         |
| 2                           | <b>23D</b> [14]             | Low ACE         | Moscow   | 2019 | <b>Y215C</b><br>rs3730025     | 1385                    | 591         |
| 3                           | <b>47S</b> [14]             | Low ACE         | Moscow   | 2019 | None                          | 1378                    | 614         |
| 4                           | <b>IP1</b> [13]             | High ACE        | Albany   | 2020 | <b>N1196K</b><br>rs1033103629 | 1912                    | 401         |
| 5                           | <b>IP2</b> [13]             | High ACE        | Albany   | 2020 | <b>P1199L</b><br>rs121912703  | 1245                    | 276         |
| 6                           | <b>IP3</b> [13]             | High ACE        | Moscow   | 2020 | <b>Q1224X</b><br>rs1174820268 | 1326                    | 314         |
| 7                           | <b>1AK</b> [16]             | Healthy control | Chicago  | 2022 | None                          | 1323                    | 633         |
| 8                           | <b>9QN</b> [16]             | ACE outlier     | Chicago  | 2022 | None                          | 1435                    | 649         |
| 9                           | <b>BC107</b>                | Low ACE         | Albany   | 2022 | None                          | 1358                    | 580         |
| 10                          | <b>BC201</b>                | Low ACE         | Albany   | 2022 | None                          | 1375                    | 635         |
| 11                          | <b>S3</b>                   | Low ACE         | Debrecen | 2022 | None                          | 1232                    | 566         |
| 12                          | <b>S15</b>                  | Low ACE         | Debrecen | 2022 | None                          | 1181                    | 402         |
| 13                          | <b>S28</b>                  | Low ACE         | Debrecen | 2022 | None                          | 1223                    | 441         |
| 14                          | <b>S53</b>                  | Low ACE         | Debrecen | 2022 | None                          | 1294                    | 463         |
| 15                          | <b>S63</b>                  | Low ACE         | Debrecen | 2022 | None                          | 1278                    | 435         |
| 16                          | <b>S136</b>                 | Low ACE         | Debrecen | 2022 | <b>Y776X</b><br>rs761458810   | 1295                    | 450         |

Patients with genomic DNA were subjected to WES. Only mutations with probably and possibly damaging mutations (according to PolyPhen-2 HVAR score) were included. **Blue**-low blood ACE (< 50% of mean value). **Red**-high blood ACE (>400% of mean value).

Table S4. **Damaging mutations, unique for Index Patient S13** (Attached Below)

**Table S2. All damaging mutations in the genes of Index Patient S13**

Genomic DNA from Patient S13 was subjected to WES. Included are damaging mutations: 103 stopgain mutations, 641 nonsense/indels mutations, 12 stoploss mutations, and 1381 damaging missense mutations arranged according to ascending PolyPhen-2, HVAR scores. There are two prediction classifications **D** (Probably damaging, score $\geq$ 0.909), **P** (possibly damaging, 0.446 $\leq$ score $\leq$ 0.908). Mutations of interest are highlighted in yellow – ABO (rs8176743), ADAMTSL4 (rs199599791), NOD2 (rs2066844), SAA1 (rs1136747), and SMPD1 (rs550365194).

| NO.<br>SNP | GeneName         | AAChange | ID          | PolyPhen-2<br>(HVAR) | Genotype |
|------------|------------------|----------|-------------|----------------------|----------|
| 1          | APOL3            | p.S39R   | rs132653    | 0.447,P              | T/T      |
| 2          | OR4A47           | p.V145M  | rs7103992   | 0.447,P              | A/A      |
| 3          | ABCA6            | p.N1322S | rs2302134   | 0.450,P              | T/C      |
| 4          | TAF1B            | p.T487M  | rs16867245  | 0.451,P              | C/T      |
| 5          | HAP1             | p.S58T   | rs4796603   | 0.451,P              | T/T      |
| 6          | PPP1R16B         | p.K473Q  | rs61752055  | 0.451,P              | A/C      |
| 7          | TAS2R31          | p.L98P   | rs73049067  | 0.451,P              | A/G      |
| 8          | PLIN4            | p.A1124T | rs7251858   | 0.452,P              | C/T      |
| 9          | ADAM15           | p.P769S  | rs41264285  | 0.453,P              | C/T      |
| 10         | SLC38A10         | p.E676D  | rs55872261  | 0.453,P              | C/A      |
| 11         | RPAP1            | p.E506K  | rs1200345   | 0.454,P              | C/T      |
| 12         | PLA2G3           | p.S322R  | rs2072193   | 0.454,P              | G/C      |
| 13         | ERCC5,BIVM-ERCC5 | p.G1507R | rs9514066   | 0.454,P              | C/C      |
| 14         | MEOX1            | p.S27L   | rs9898682   | 0.454,P              | G/A      |
| 15         | ZNF813           | p.Y439F  | rs10422163  | 0.455,P              | A/T      |
| 16         | ZNF664           | p.V58G   | rs80197353  | 0.455,P              | T/G      |
| 17         | PSG9             | p.A212S  | rs150423600 | 0.457,P              | C/A      |
| 18         | FBXW8            | p.R192Q  | rs4076700   | 0.457,P              | A/A      |
| 19         | SPATA31E1        | p.P503S  | rs75035814  | 0.457,P              | C/T      |
| 20         | NAA25            | p.L915I  | rs12298022  | 0.458,P              | G/T      |
| 21         | ADAMDEC1         | p.N365S  | rs3765124   | 0.458,P              | A/G      |
| 22         | HAP1             | p.S357L  | rs4796693   | 0.458,P              | A/A      |
| 23         | FAM160B2         | p.L684F  | rs117802113 | 0.459,P              | C/T      |
| 24         | SYNPO2L          | p.S833Y  | rs34163229  | 0.459,P              | G/T      |
| 25         | HLX              | p.Q125H  | rs62621984  | 0.459,P              | A/C      |
| 26         | C5               | p.V145I  | rs17216529  | 0.461,P              | C/T      |
| 27         | PCDHB6           | p.T449I  | rs17844439  | 0.461,P              | C/T      |
| 28         | LYZL1            | p.K13R   | rs2532753   | 0.461,P              | G/G      |
| 29         | SLC24A1          | p.T37S   | rs3743171   | 0.461,P              | A/T      |
| 30         | TBKBP1           | p.A508T  | rs80267077  | 0.461,P              | G/A      |
| 31         | HPS4             | p.V570M  | rs5752330   | 0.462,P              | T/T      |
| 32         | FEZ2             | p.R356C  | rs848642    | 0.462,P              | A/A      |
| 33         | PKD1L2           | p.Q120L  | rs7191351   | 0.463,P              | A/A      |
| 34         | CACNA1S          | p.L458H  | rs12742169  | 0.466,P              | A/T      |

|    |                 |          |              |                |     |
|----|-----------------|----------|--------------|----------------|-----|
| 35 | SERPINB11       | p.S303P  | rs1395267    | <b>0.466,P</b> | T/C |
| 36 | PALM3           | p.T412R  | rs75389771   | <b>0.466,P</b> | C/C |
| 37 | CCDC122         | p.I269T  | rs9567280    | <b>0.466,P</b> | A/G |
| 38 | GAGE12J         | p.R28Q   | rs7064530    | <b>0.467,P</b> | A/A |
| 39 | ZNF607          | p.K531R  | rs958305     | <b>0.467,P</b> | C/C |
| 40 | IL16            | p.P434S  | rs4072111    | <b>0.468,P</b> | C/T |
| 41 | KMT2C           | p.T316S  | rs10454320   | <b>0.469,P</b> | T/A |
| 42 | CMYA5           | p.D190G  | rs10942901   | <b>0.469,P</b> | A/G |
| 43 | PDIA6           | p.K266R  | rs4807       | <b>0.469,P</b> | T/C |
| 44 | TBC1D10A        | p.R411H  | rs4823086    | <b>0.469,P</b> | C/T |
| 45 | ADGRF2          | p.I399V  | rs9381594    | <b>0.470,P</b> | A/G |
| 46 | B3GLCT          | p.E370K  | rs1041073    | <b>0.472,P</b> | G/A |
| 47 | INCENP          | p.M506T  | rs2277283    | <b>0.472,P</b> | T/C |
| 48 | COL16A1         | p.T62K   | rs2228552    | <b>0.473,P</b> | G/T |
| 49 | ZNF681          | p.K479R  | rs1852432    | <b>0.474,P</b> | T/C |
| 50 | KIF26B          | p.T1302M | rs199742874  | <b>0.475,P</b> | C/T |
| 51 | GPR35           | p.T139M  | rs3749171    | <b>0.477,P</b> | C/T |
| 52 | CHRNA9          | p.A315V  | rs55633891   | <b>0.477,P</b> | T/T |
| 53 | HLA-C           | p.T118I  | rs1131119    | <b>0.479,P</b> | G/A |
| 54 | OR13C5          | p.M258T  | rs1851724    | <b>0.479,P</b> | A/G |
| 55 | ABO             | p.G235S  | rs8176743    | <b>0.480,P</b> | C/T |
| 56 | CECR2           | p.R293H  | rs5747211    | <b>0.482,P</b> | G/A |
| 57 | NOD2            | p.R702W  | rs2066844    | <b>0.483,P</b> | C/T |
| 58 | CCDC129         | p.A42D   | rs7811042    | <b>0.483,P</b> | A/A |
| 59 | CD163L1         | p.L523M  | rs6488268    | <b>0.484,P</b> | T/T |
| 60 | MUC4            | p.T3659R | rs779277004  | <b>0.485,P</b> | G/C |
| 61 | KIR3DL1,KIR3DS1 | p.G259R  | rs1049215    | <b>0.486,P</b> | G/C |
| 62 | NOXO1           | p.R39H   | rs117304081  | <b>0.486,P</b> | C/T |
| 63 | OR13D1          | p.L64V   | rs13294411   | <b>0.486,P</b> | C/G |
| 64 | GOLGA6L2        | p.K342E  | rs35708006   | <b>0.486,P</b> | C/C |
| 65 | SAMD9           | p.V549L  | rs10279499   | <b>0.489,P</b> | C/A |
| 66 | TPSB2           | p.G23V   | rs201836020  | <b>0.489,P</b> | C/A |
| 67 | LY6G6D          | p.L9V    | rs3749952    | <b>0.490,P</b> | T/G |
| 68 | C3orf20         | p.L422V  | rs6790129    | <b>0.490,P</b> | C/G |
| 69 | ERO1B           | p.D129V  | rs2477599    | <b>0.491,P</b> | T/A |
| 70 | OR5H15          | p.T167S  | rs4133322    | <b>0.491,P</b> | T/T |
| 71 | PRSS1           | p.N182K  | rs1348773645 | <b>0.492,P</b> | C/G |
| 72 | MUC4            | p.E953Q  | rs13095016   | <b>0.492,P</b> | G/G |
| 73 | SPTBN5          | p.R1345H | rs2290559    | <b>0.493,P</b> | C/T |
| 74 | FUT5            | p.P187L  | rs778970     | <b>0.493,P</b> | G/A |
| 75 | ZAN             | p.F1969L | rs542137     | <b>0.495,P</b> | C/G |
| 76 | ITSN2           | p.V277I  | rs7603997    | <b>0.496,P</b> | C/T |
| 77 | USP29           | p.N368S  | rs1027392    | <b>0.497,P</b> | A/G |
| 78 | C8orf46         | p.A79S   | rs61736270   | <b>0.497,P</b> | G/T |
| 79 | OR51I1          | p.A252S  | rs1498486    | <b>0.500,P</b> | C/A |



|     |          |          |             |                |     |
|-----|----------|----------|-------------|----------------|-----|
| 80  | KRT37    | p.P434S  | rs17737019  | <b>0.500,P</b> | G/A |
| 81  | NAT2     | p.I114T  | rs1801280   | <b>0.500,P</b> | C/C |
| 82  | CLIP1    | p.T27M   | rs34292795  | <b>0.500,P</b> | G/A |
| 83  | SLC26A10 | p.A193T  | rs923828    | <b>0.501,P</b> | G/A |
| 84  | KRT5     | p.G138E  | rs11170164  | <b>0.503,P</b> | C/T |
| 85  | C15orf41 | p.L73V   | rs3784678   | <b>0.503,P</b> | C/G |
| 86  | SYCP2L   | p.N647D  | rs3798751   | <b>0.503,P</b> | A/G |
| 87  | MUC16    | p.S2058P | rs1574479   | <b>0.504,P</b> | A/G |
| 88  | HPS4     | p.Q643H  | rs1894704   | <b>0.504,P</b> | A/A |
| 89  | CHIA     | p.D47N   | rs41282494  | <b>0.504,P</b> | G/A |
| 90  | TMEM99   | p.I4M    | rs17474506  | <b>0.506,P</b> | C/G |
| 91  | MADCAM1  | p.P300H  | rs3745925   | <b>0.506,P</b> | C/A |
| 92  | OR2T33   | p.A169V  | rs10888338  | <b>0.507,P</b> | G/A |
| 93  | HSPG2    | p.L148L  | rs2254357   | <b>0.509,P</b> | C/G |
| 94  | CES1     | p.S82L   | rs62028647  | <b>0.509,P</b> | G/A |
| 95  | LILRB1   | p.R97C   | rs766498638 | <b>0.509,P</b> | C/T |
| 96  | PRB4     | p.P71T   | rs12308381  | <b>0.510,P</b> | G/T |
| 97  | ARSE     | p.G449S  | rs35143646  | <b>0.511,P</b> | T/T |
| 98  | PRRC2A   | p.R1740H | rs1046089   | <b>0.513,P</b> | G/A |
| 99  | OLFM2    | p.T127M  | rs11556087  | <b>0.513,P</b> | G/A |
| 100 | CTBP2    | p.Q539E  | rs2946994   | <b>0.513,P</b> | G/C |
| 101 | OR5L1    | p.R54W   | rs34961497  | <b>0.513,P</b> | C/T |
| 102 | ANKRD18A | p.Y750C  | rs2799163   | <b>0.515,P</b> | T/C |
| 103 | KRTAP4-8 | p.R126H  | rs80168553  | <b>0.515,P</b> | C/T |
| 104 | OR4N2    | p.T7R    | rs72663752  | <b>0.517,P</b> | C/G |
| 105 | COL6A3   | p.K1754R | rs77632596  | <b>0.517,P</b> | T/C |
| 106 | MUC6     | p.P1878S | rs200932890 | <b>0.518,P</b> | G/A |
| 107 | CLDN23   | p.V210M  | rs12548737  | <b>0.521,P</b> | G/A |
| 108 | VPS26A   | p.R110H  | rs146283722 | <b>0.521,P</b> | G/A |
| 109 | TCF19    | p.P241L  | rs2073724   | <b>0.521,P</b> | C/T |
| 110 | TAS2R46  | p.L228M  | rs2708380   | <b>0.521,P</b> | T/T |
| 111 | TAS2R19  | p.G282R  | rs72475481  | <b>0.521,P</b> | C/T |
| 112 | C8orf44  | p.F148S  | rs1057463   | <b>0.522,P</b> | T/C |
| 113 | TJP1     | p.I794V  | rs2229515   | <b>0.522,P</b> | T/C |
| 114 | CDHR3    | p.L506F  | rs76067797  | <b>0.522,P</b> | C/T |
| 115 | CHST13   | p.A271V  | rs1056523   | <b>0.523,P</b> | C/T |
| 116 | NBEA     | p.I2501V | rs11538677  | <b>0.525,P</b> | A/G |
| 117 | PAK7     | p.R335P  | rs11700112  | <b>0.525,P</b> | C/G |
| 118 | CLRN2    | p.L113V  | rs13147559  | <b>0.526,P</b> | C/G |
| 119 | MGME1    | p.S15C   | rs11551768  | <b>0.527,P</b> | A/T |
| 120 | BOD1     | p.V136M  | rs72822197  | <b>0.528,P</b> | C/T |
| 121 | FAM131C  | p.R245W  | rs77667563  | <b>0.528,P</b> | G/A |
| 122 | GEMIN4   | p.R1033C | rs7813      | <b>0.528,P</b> | G/A |
| 123 | MKI67    | p.T2720P | rs1050767   | <b>0.529,P</b> | T/G |
| 124 | ADAMTSL1 | p.E990A  | rs41268983  | <b>0.530,P</b> | A/C |

|     |         |          |             |                |     |
|-----|---------|----------|-------------|----------------|-----|
| 125 | RELL2   | p.G196R  | rs17855844  | <b>0.531,P</b> | G/C |
| 126 | ZFHX4   | p.P1273S | rs61729527  | <b>0.531,P</b> | C/T |
| 127 | MUC4    | p.P1376L | rs78009073  | <b>0.531,P</b> | A/A |
| 128 | REPIN1  | p.A97V   | rs17173703  | <b>0.533,P</b> | C/T |
| 129 | GOLGA2  | p.R686W  | rs72756867  | <b>0.533,P</b> | G/A |
| 130 | ALPK2   | p.G810S  | rs3809970   | <b>0.534,P</b> | T/T |
| 131 | LILRA6  | p.G149R  | rs1052966   | <b>0.535,P</b> | T/T |
| 132 | SDCCAG8 | p.E77D   | rs2275155   | <b>0.536,P</b> | A/T |
| 133 | FAM86C1 | p.A7S    | rs12283300  | <b>0.537,P</b> | T/T |
| 134 | TUBB8   | p.H105R  | rs9329307   | <b>0.537,P</b> | T/C |
| 135 | MUC4    | p.V1353A | rs12491056  | <b>0.539,P</b> | G/G |
| 136 | PEMT    | p.S222N  | rs7946      | <b>0.539,P</b> | T/T |
| 137 | EFCAB8  | p.R118C  | rs13037496  | <b>0.540,P</b> | C/T |
| 138 | SPRR1A  | p.V61I   | rs1611764   | <b>0.542,P</b> | G/A |
| 139 | GTPBP10 | p.C88W   | rs42663     | <b>0.542,P</b> | T/G |
| 140 | TEKT4   | p.T83M   | rs4854235   | <b>0.542,P</b> | C/T |
| 141 | ZNF768  | p.E181D  | rs10871453  | <b>0.543,P</b> | C/G |
| 142 | UGT2A3  | p.A497T  | rs13128286  | <b>0.544,P</b> | T/T |
| 143 | ABCB5   | p.T131I  | rs17143212  | <b>0.544,P</b> | C/T |
| 144 | DCAF12  | p.R131Q  | rs11557154  | <b>0.545,P</b> | C/T |
| 145 | LAMA5   | p.R3079W | rs944895    | <b>0.545,P</b> | G/A |
| 146 | ZNF653  | p.E352K  | rs74552618  | <b>0.546,P</b> | C/T |
| 147 | CROCC   | p.Q302E  | rs143501240 | <b>0.547,P</b> | C/G |
| 148 | VWDE    | p.E869K  | rs17165910  | <b>0.549,P</b> | C/T |
| 149 | HIVEP1  | p.T187M  | rs2228209   | <b>0.549,P</b> | C/T |
| 150 | MKI67   | p.R2649H | rs12777740  | <b>0.550,P</b> | C/T |
| 151 | TMEM244 | p.F111V  | rs7776426   | <b>0.550,P</b> | A/C |
| 152 | GPR35   | p.T284M  | rs12468485  | <b>0.552,P</b> | C/T |
| 153 | ZBTB42  | p.E232K  | rs4983387   | <b>0.552,P</b> | G/A |
| 154 | EFHB    | p.P139S  | rs13078867  | <b>0.554,P</b> | G/A |
| 155 | MUC6    | p.T1822A | rs76686156  | <b>0.554,P</b> | T/C |
| 156 | FMO2    | p.E314G  | rs2020863   | <b>0.555,P</b> | A/G |
| 157 | FAM205A | p.T189M  | rs1854574   | <b>0.556,P</b> | G/A |
| 158 | ECM1    | p.T130M  | rs3737240   | <b>0.556,P</b> | C/T |
| 159 | ITIH2   | p.L569V  | rs7084817   | <b>0.556,P</b> | C/G |
| 160 | KANK3   | p.E610K  | rs7249069   | <b>0.556,P</b> | C/T |
| 161 | ZNF808  | p.D262N  | rs329965    | <b>0.557,P</b> | A/A |
| 162 | PIAS2   | p.I598V  | rs117151539 | <b>0.558,P</b> | T/C |
| 163 | NCKAP5  | p.N1093Y | rs16841277  | <b>0.558,P</b> | T/A |
| 164 | TAS2R31 | p.L48V   | rs760444623 | <b>0.558,P</b> | G/C |
| 165 | MKI67   | p.T1247I | rs4750685   | <b>0.559,P</b> | G/A |
| 166 | ZNF502  | p.Q174R  | rs56084453  | <b>0.559,P</b> | G/G |
| 167 | OR11G2  | p.I99N   | rs4981822   | <b>0.560,P</b> | A/A |
| 168 | SNTG2   | p.S200L  | rs6751090   | <b>0.560,P</b> | C/T |
| 169 | FUT10   | p.L368V  | rs17855838  | <b>0.562,P</b> | G/C |

|     |            |          |              |                |     |
|-----|------------|----------|--------------|----------------|-----|
| 170 | LILRB1     | p.Y99N   | rs570016342  | <b>0.562,P</b> | T/A |
| 171 | DDX60L     | p.V754A  | rs61740705   | <b>0.562,P</b> | A/G |
| 172 | TRIM49C    | p.T394N  | rs75119043   | <b>0.562,P</b> | C/A |
| 173 | OBP2A      | p.P133S  | rs3178137    | <b>0.563,P</b> | C/T |
| 174 | FHDC1      | p.R639C  | rs3811833    | <b>0.563,P</b> | T/T |
| 175 | C1orf167   | p.A850T  | rs55967531   | <b>0.563,P</b> | G/A |
| 176 | C9orf84    | p.E1174G | rs7869279    | <b>0.563,P</b> | T/C |
| 177 | CDHR2      | p.L1164M | rs17078347   | <b>0.564,P</b> | C/A |
| 178 | TAX1BP1    | p.L307I  | rs11540483   | <b>0.566,P</b> | T/A |
| 179 | TMPRSS15   | p.E134Q  | rs2824790    | <b>0.567,P</b> | C/G |
| 180 | NCAPG2     | p.A132S  | N/A          | <b>0.569,P</b> | C/A |
| 181 | TNFAIP2    | p.Q282E  | rs1132339    | <b>0.571,P</b> | C/G |
| 182 | HLA-DRB1   | p.Y59H   | rs11554462   | <b>0.571,P</b> | A/G |
| 183 | SLC7A9     | p.L223M  | rs1007160    | <b>0.574,P</b> | T/T |
| 184 | XRCC1      | p.R194W  | rs1799782    | <b>0.574,P</b> | G/A |
| 185 | KRTAP10-10 | p.V158M  | rs4818950    | <b>0.574,P</b> | G/A |
| 186 | WBSCR28    | p.I14N   | rs11770052   | <b>0.576,P</b> | A/A |
| 187 | HLA-C      | p.T187P  | rs1050685    | <b>0.577,P</b> | T/G |
| 188 | PIEZO1     | p.I2265V | rs1803382    | <b>0.578,P</b> | T/C |
| 189 | OR5B3      | p.N170S  | rs12280114   | <b>0.580,P</b> | T/C |
| 190 | PCDHB16    | p.T482I  | rs17844646   | <b>0.580,P</b> | C/T |
| 191 | MRPL9      | p.E210A  | rs8480       | <b>0.581,P</b> | T/G |
| 192 | DSPP       | p.D1074G | rs202210195  | <b>0.583,P</b> | A/G |
| 193 | OSBPL1A    | p.S810P  | rs35693789   | <b>0.583,P</b> | A/G |
| 194 | ADO        | p.G25W   | rs2236295    | <b>0.584,P</b> | G/T |
| 195 | SIK3       | p.P917R  | rs12225230   | <b>0.587,P</b> | G/C |
| 196 | MKI67      | p.D2760G | rs10082391   | <b>0.588,P</b> | T/C |
| 197 | MUC3A      | p.T2827I | rs145584597  | <b>0.588,P</b> | C/T |
| 198 | MUC4       | p.H3245Q | rs1018195432 | <b>0.589,P</b> | G/C |
| 199 | CASP12     | p.T21I   | rs138698464  | <b>0.589,P</b> | G/A |
| 200 | SHBG       | p.P69L   | rs6258       | <b>0.591,P</b> | C/T |
| 201 | SCLY       | p.A183T  | rs3210400    | <b>0.593,P</b> | G/A |
| 202 | RNF32      | p.R307C  | rs2302146    | <b>0.594,P</b> | C/T |
| 203 | CTU1       | p.A107V  | rs17855403   | <b>0.595,P</b> | G/A |
| 204 | OR6C65     | p.T222A  | rs7971073    | <b>0.595,P</b> | G/G |
| 205 | FAM171A1   | p.P465S  | rs3814165    | <b>0.596,P</b> | A/A |
| 206 | CELA3B     | p.R79W   | rs7528405    | <b>0.598,P</b> | T/T |
| 207 | GALP       | p.I72M   | rs3745833    | <b>0.599,P</b> | C/G |
| 208 | EFHC1      | p.R140W  | rs3804506    | <b>0.599,P</b> | C/T |
| 209 | SFI1       | p.W330R  | rs16989291   | <b>0.600,P</b> | T/C |
| 210 | REG3A      | p.H50P   | rs201139260  | <b>0.600,P</b> | T/G |
| 211 | PKD1L3     | p.H571Q  | rs1559401    | <b>0.601,P</b> | T/T |
| 212 | OR52E2     | p.N5S    | rs16909440   | <b>0.601,P</b> | T/C |
| 213 | 10-Mar     | p.F318S  | rs9891498    | <b>0.601,P</b> | A/G |
| 214 | INCENP     | p.R697Q  | rs116873148  | <b>0.602,P</b> | G/A |

|     |                 |           |              |                |     |
|-----|-----------------|-----------|--------------|----------------|-----|
| 215 | MFSD9           | p.I288T   | rs33993717   | <b>0.602,P</b> | A/G |
| 216 | KIR3DL1,KIR3DS1 | p.W304L   | rs35974949   | <b>0.606,P</b> | G/T |
| 217 | ERBB2           | p.P1155A  | rs1058808    | <b>0.607,P</b> | G/G |
| 218 | PZP             | p.N857S   | rs3213831    | <b>0.607,P</b> | C/C |
| 219 | HNRNPA1L2       | p.Y289C   | rs78872760   | <b>0.611,P</b> | A/G |
| 220 | TRIM51          | p.N20S    | rs2063276    | <b>0.612,P</b> | A/G |
| 221 | SDAD1           | p.S575C   | rs2242471    | <b>0.612,P</b> | G/C |
| 222 | GBP6            | p.A331S   | rs4658359    | <b>0.612,P</b> | T/T |
| 223 | LRRC56          | p.D523H   | rs10902171   | <b>0.615,P</b> | G/C |
| 224 | PTAFR           | p.N114S   | rs138629813  | <b>0.615,P</b> | T/C |
| 225 | ZNF568          | p.R461H   | rs16971886   | <b>0.615,P</b> | G/A |
| 226 | TOR1A           | p.D216H   | rs1801968    | <b>0.615,P</b> | C/G |
| 227 | MAFA            | p.G347C   | rs62521874   | <b>0.615,P</b> | A/A |
| 228 | SCARF1          | p.E639D   | rs3744644    | <b>0.616,P</b> | G/G |
| 229 | OR52E6          | p.S95P    | rs4592451    | <b>0.616,P</b> | A/G |
| 230 | KCNJ18          | p.L211F   | rs1435776313 | <b>0.618,P</b> | C/T |
| 231 | TUBA3E          | p.R221S   | rs13000249   | <b>0.619,P</b> | G/T |
| 232 | CDK5RAP2        | p.E289Q   | rs4836822    | <b>0.619,P</b> | C/G |
| 233 | ACAT2           | p.K211R   | rs25683      | <b>0.621,P</b> | G/G |
| 234 | KRTAP15-1       | p.L43M    | rs2832873    | <b>0.622,P</b> | C/A |
| 235 | FAM83H          | p.H437Y   | rs28573699   | <b>0.622,P</b> | G/A |
| 236 | OR14I1          | p.D50N    | rs4509608    | <b>0.624,P</b> | T/T |
| 237 | OR10A4          | p.R262Q   | rs10839635   | <b>0.627,P</b> | G/A |
| 238 | MRPL28          | p.D160E   | rs11557302   | <b>0.628,P</b> | G/C |
| 239 | MPHOSPH6        | p.I58V    | rs2303267    | <b>0.628,P</b> | T/C |
| 240 | OTOL1           | p.E470A   | rs3921595    | <b>0.628,P</b> | A/C |
| 241 | S1PR2           | p.V286A   | rs117064827  | <b>0.630,P</b> | A/G |
| 242 | TPR             | p.S960N   | rs3753565    | <b>0.630,P</b> | C/T |
| 243 | EHBP1L1         | p.V538G   | rs6591182    | <b>0.630,P</b> | T/G |
| 244 | COQ7            | p.T103M   | rs11074359   | <b>0.631,P</b> | C/T |
| 245 | TMPRSS11E       | p.Y303C   | rs976002     | <b>0.631,P</b> | A/G |
| 246 | UGT2B4          | p.D322E   | rs13119049   | <b>0.633,P</b> | A/T |
| 247 | ERICH6          | p.L426V   | rs73003074   | <b>0.633,P</b> | A/C |
| 248 | EYS             | p.S2556C  | rs66462731   | <b>0.634,P</b> | T/A |
| 249 | TEX33           | p.Y184C   | rs9610624    | <b>0.634,P</b> | T/C |
| 250 | FCER2           | p.R62W    | rs2228137    | <b>0.636,P</b> | G/A |
| 251 | TTN             | p.T26621M | rs3731746    | <b>0.636,P</b> | G/A |
| 252 | ZNF669          | p.E76D    | rs4925692    | <b>0.636,P</b> | C/A |
| 253 | RYR3            | p.N2016S  | rs942844610  | <b>0.636,P</b> | A/G |
| 254 | HLA-DQB1        | p.G77E    | rs1049083    | <b>0.637,P</b> | T/T |
| 255 | MROH5           | p.A375V   | rs12547980   | <b>0.637,P</b> | A/A |
| 256 | IL1A            | p.A114S   | rs17561      | <b>0.637,P</b> | C/A |
| 257 | STARD3          | p.R117Q   | rs1877031    | <b>0.637,P</b> | A/A |
| 258 | NOC3L           | p.E472A   | rs3758526    | <b>0.637,P</b> | T/G |
| 259 | GSDMA           | p.T314N   | rs56030650   | <b>0.637,P</b> | C/A |

|     |          |          |              |                |     |
|-----|----------|----------|--------------|----------------|-----|
| 260 | RGS9BP   | p.A96S   | rs259290     | <b>0.638,P</b> | G/T |
| 261 | PKD1L2   | p.P301A  | rs11150370   | <b>0.639,P</b> | G/C |
| 262 | NOP9     | p.S308N  | rs4280164    | <b>0.639,P</b> | G/A |
| 263 | AEN      | p.S88C   | rs8026929    | <b>0.639,P</b> | C/G |
| 264 | MVB12A   | p.D157N  | rs35944915   | <b>0.640,P</b> | G/A |
| 265 | RGPD3    | p.E1287K | rs3898279    | <b>0.640,P</b> | C/T |
| 266 | ZNF254   | p.D52G   | rs17854260   | <b>0.641,P</b> | A/G |
| 267 | FBN3     | p.P1958H | rs7245429    | <b>0.641,P</b> | G/T |
| 268 | MT1A     | p.T27N   | rs11640851   | <b>0.642,P</b> | A/A |
| 269 | MUC20    | p.D322H  | rs2688542    | <b>0.642,P</b> | G/C |
| 270 | TSEN54   | p.K347N  | rs9911502    | <b>0.642,P</b> | G/C |
| 271 | MKI67    | p.R2786Q | rs10764749   | <b>0.644,P</b> | C/T |
| 272 | KNG1     | p.I197M  | rs2304456    | <b>0.644,P</b> | T/G |
| 273 | MUC6     | p.P1794T | rs35549382   | <b>0.645,P</b> | G/T |
| 274 | SLC52A1  | p.V296M  | rs2304445    | <b>0.646,P</b> | C/T |
| 275 | PTCH1    | p.P1164L | rs357564     | <b>0.646,P</b> | G/A |
| 276 | ATAD5    | p.E135G  | rs11080134   | <b>0.647,P</b> | A/G |
| 277 | DNAJC17  | p.V204L  | rs117485355  | <b>0.647,P</b> | C/G |
| 278 | AHRR     | p.P189A  | rs2292596    | <b>0.647,P</b> | C/G |
| 279 | TEX35    | p.L171R  | rs3813636    | <b>0.648,P</b> | G/G |
| 280 | CCDC125  | p.V13M   | rs10471774   | <b>0.649,P</b> | C/T |
| 281 | ECE2     | p.R170W  | rs11546878   | <b>0.649,P</b> | T/T |
| 282 | GOLGA5   | p.A67G   | rs17128572   | <b>0.650,P</b> | C/G |
| 283 | ABCG5    | p.R50C   | rs6756629    | <b>0.650,P</b> | G/A |
| 284 | LILRB2   | p.L243F  | rs1473278082 | <b>0.651,P</b> | G/A |
| 285 | MOCOS    | p.S22R   | rs113873219  | <b>0.652,P</b> | C/A |
| 286 | C10orf11 | p.S181F  | rs35349706   | <b>0.652,P</b> | T/T |
| 287 | KBTBD13  | p.A81V   | rs2919358    | <b>0.653,P</b> | C/T |
| 288 | CDON     | p.A686V  | rs12274923   | <b>0.654,P</b> | G/A |
| 289 | CRTC1    | p.T344A  | rs3746266    | <b>0.654,P</b> | A/G |
| 290 | OR52N1   | p.T79N   | rs12365487   | <b>0.655,P</b> | T/T |
| 291 | GOLGA6L2 | p.R235P  | rs12594944   | <b>0.655,P</b> | G/G |
| 292 | PLB1     | p.A1318V | rs2199619    | <b>0.655,P</b> | C/T |
| 293 | TSEN54   | p.I137L  | rs11559205   | <b>0.656,P</b> | A/C |
| 294 | FLG2     | p.C298S  | rs2282302    | <b>0.656,P</b> | C/G |
| 295 | KIF20B   | p.K1609E | rs34354493   | <b>0.656,P</b> | A/G |
| 296 | OR51I2   | p.R151P  | rs16931292   | <b>0.657,P</b> | G/C |
| 297 | OR5L2    | p.R141P  | rs75822385   | <b>0.657,P</b> | G/C |
| 298 | TAS2R43  | p.L235F  | rs3759244    | <b>0.658,P</b> | A/A |
| 299 | LAMA4    | p.R538C  | rs138153075  | <b>0.659,P</b> | G/A |
| 300 | HLA-DPB1 | p.L207M  | rs14362      | <b>0.659,P</b> | C/A |
| 301 | WDYHV1   | p.R66C   | rs3824250    | <b>0.659,P</b> | C/T |
| 302 | NCAPD2   | p.V797M  | rs10849482   | <b>0.660,P</b> | G/A |
| 303 | CRYBG3   | p.S372F  | rs17301717   | <b>0.660,P</b> | T/T |
| 304 | VCAN     | p.G428D  | rs2287926    | <b>0.660,P</b> | A/A |

|     |             |          |              |                |     |
|-----|-------------|----------|--------------|----------------|-----|
| 305 | DNAH14      | p.N1099Y | rs3128655    | <b>0.660,P</b> | A/T |
| 306 | COASY       | p.S84Y   | rs615942     | <b>0.660,P</b> | C/A |
| 307 | AHNAK2      | p.P1562L | rs61996045   | <b>0.660,P</b> | A/A |
| 308 | FAM220A     | p.R127Q  | rs3750040    | <b>0.662,P</b> | C/T |
| 309 | OR52R1      | p.I129T  | rs7941731    | <b>0.662,P</b> | A/G |
| 310 | OTOP2       | p.G465W  | rs6501741    | <b>0.663,P</b> | G/T |
| 311 | UBASH3B     | p.A68T   | rs12790613   | <b>0.665,P</b> | G/A |
| 312 | KRTAP12-2   | p.S29C   | rs7275281    | <b>0.665,P</b> | G/C |
| 313 | DNAJB11     | p.I264V  | rs8147       | <b>0.665,P</b> | A/G |
| 314 | HLA-DQB2    | p.S228G  | rs9276572    | <b>0.665,P</b> | C/C |
| 315 | C7          | p.S389T  | rs1063499    | <b>0.666,P</b> | C/C |
| 316 | FXYP4       | p.D28H   | rs150156235  | <b>0.669,P</b> | G/C |
| 317 | ZNF493      | p.L420V  | rs10414834   | <b>0.669,P</b> | C/G |
| 318 | TLR10       | p.N241H  | rs11096957   | <b>0.669,P</b> | T/G |
| 319 | PKD1L2      | p.A2055T | rs16954717   | <b>0.669,P</b> | C/T |
| 320 | RNF39       | p.D268N  | rs1057539    | <b>0.670,P</b> | C/T |
| 321 | OR9G1,OR9G9 | p.R169C  | rs11228733   | <b>0.670,P</b> | C/T |
| 322 | DNAH11      | p.S654C  | rs62441683   | <b>0.670,P</b> | C/G |
| 323 | MAP2K3      | p.R65L   | rs56067280   | <b>0.671,P</b> | G/T |
| 324 | GBP1        | p.A409G  | rs1048443    | <b>0.672,P</b> | G/C |
| 325 | AHNAK2      | p.P5397A | rs3742935    | <b>0.672,P</b> | C/C |
| 326 | KRT6C       | p.G111D  | rs394598     | <b>0.672,P</b> | T/T |
| 327 | OR1L6       | p.I215T  | rs10985760   | <b>0.673,P</b> | T/C |
| 328 | C14orf159   | p.D507N  | rs2295524    | <b>0.673,P</b> | G/A |
| 329 | GPR101      | p.V124L  | rs1190736    | <b>0.674,P</b> | A/A |
| 330 | LRMP        | p.C197S  | rs1908946    | <b>0.674,P</b> | G/C |
| 331 | GLMP        | p.P203S  | rs10908496   | <b>0.675,P</b> | G/A |
| 332 | NIPSNAP3A   | p.R100Q  | rs2274870    | <b>0.675,P</b> | G/A |
| 333 | CHMP4A      | p.G196R  | rs2295322    | <b>0.675,P</b> | C/T |
| 334 | BPIFB4      | p.N320T  | rs2889732    | <b>0.675,P</b> | A/C |
| 335 | HLA-C       | p.T187M  | rs1050686    | <b>0.676,P</b> | G/A |
| 336 | TIGD2       | p.H475R  | rs2280099    | <b>0.677,P</b> | A/G |
| 337 | FCGBP       | p.P1961S | rs1464897604 | <b>0.679,P</b> | G/A |
| 338 | COL11A2     | p.P894L  | rs2855430    | <b>0.680,P</b> | G/A |
| 339 | NDUFAF1     | p.A314G  | rs12900702   | <b>0.683,P</b> | G/C |
| 340 | PTPRB       | p.G2152A | rs17226367   | <b>0.683,P</b> | C/G |
| 341 | PROM2       | p.G513S  | rs72819488   | <b>0.684,P</b> | G/A |
| 342 | IGFN1       | p.S3069R | rs61743921   | <b>0.686,P</b> | C/A |
| 343 | HSD17B4     | p.R82H   | rs25640      | <b>0.687,P</b> | G/A |
| 344 | CTTNBP2     | p.L1213V | rs62617115   | <b>0.687,P</b> | A/C |
| 345 | ZNF717      | p.R350C  | rs1962893    | <b>0.688,P</b> | G/A |
| 346 | WDR18       | p.I62V   | rs61732720   | <b>0.690,P</b> | A/G |
| 347 | ALS2CL      | p.E45Q   | rs7642448    | <b>0.690,P</b> | C/G |
| 348 | URAD        | p.R114S  | rs9579139    | <b>0.690,P</b> | G/T |
| 349 | USP31       | p.R931L  | rs10083789   | <b>0.691,P</b> | C/A |



|     |          |           |             |                |     |
|-----|----------|-----------|-------------|----------------|-----|
| 350 | CWH43    | p.H689N   | rs1051447   | <b>0.691,P</b> | A/A |
| 351 | R3HCC1   | p.L321R   | rs13530     | <b>0.691,P</b> | G/G |
| 352 | TM6SF1   | p.L48R    | rs79470022  | <b>0.691,P</b> | T/G |
| 353 | RANBP3L  | p.V451D   | rs145254521 | <b>0.692,P</b> | A/T |
| 354 | PLAU     | p.L141P   | rs2227564   | <b>0.694,P</b> | C/C |
| 355 | IL27RA   | p.L188P   | rs35026308  | <b>0.694,P</b> | T/C |
| 356 | SH3TC2   | p.M1184V  | rs142451273 | <b>0.695,P</b> | T/C |
| 357 | POM121   | p.Ala7Glu | rs143666868 | <b>0.695,P</b> | C/A |
| 358 | LRRC17   | p.K119E   | rs3800939   | <b>0.696,P</b> | A/G |
| 359 | KLK11    | p.R166C   | rs1048328   | <b>0.697,P</b> | G/A |
| 360 | DOK3     | p.P294R   | rs61749657  | <b>0.697,P</b> | G/C |
| 361 | VPS13D   | p.S3777C  | rs149521489 | <b>0.698,P</b> | C/G |
| 362 | NECAB1   | p.A271S   | rs115555424 | <b>0.700,P</b> | G/T |
| 363 | FGFR4    | p.G388R   | rs351855    | <b>0.700,P</b> | G/A |
| 364 | TNC      | p.R322Q   | rs145315080 | <b>0.701,P</b> | C/T |
| 365 | OR2M7    | p.V78A    | rs7555310   | <b>0.701,P</b> | A/G |
| 366 | MKI67    | p.N104S   | rs2071498   | <b>0.702,P</b> | C/C |
| 367 | TRIM49   | p.G373R   | rs12417980  | <b>0.703,P</b> | T/T |
| 368 | PLEKHG5  | p.E794K   | rs184242303 | <b>0.703,P</b> | C/T |
| 369 | TNN      | p.P930L   | rs2285215   | <b>0.703,P</b> | T/T |
| 370 | SAXO2    | p.P47L    | rs16973457  | <b>0.704,P</b> | C/T |
| 371 | ACACB    | p.E1815K  | rs61752535  | <b>0.704,P</b> | A/A |
| 372 | VCAN     | p.D2937Y  | rs160277    | <b>0.706,P</b> | G/T |
| 373 | ZNF254   | p.K496N   | rs12611425  | <b>0.707,P</b> | G/C |
| 374 | AHNAK2   | p.P2387S  | rs72702027  | <b>0.708,P</b> | A/A |
| 375 | MEIG1    | p.K9T     | rs4750568   | <b>0.709,P</b> | C/C |
| 376 | TMED5    | p.T175I   | rs1060622   | <b>0.710,P</b> | A/A |
| 377 | PLCXD1   | p.G305V   | rs112920828 | <b>0.711,P</b> | G/T |
| 378 | CA6      | p.S90G    | rs2274333   | <b>0.713,P</b> | A/G |
| 379 | MYH6     | p.A1130T  | rs28730771  | <b>0.713,P</b> | C/T |
| 380 | CLEC4A   | p.H36L    | rs2024301   | <b>0.714,P</b> | A/T |
| 381 | POLL     | p.R438W   | rs3730477   | <b>0.714,P</b> | A/A |
| 382 | C14orf37 | p.T96I    | rs3829765   | <b>0.714,P</b> | G/A |
| 383 | GRIN2C   | p.L65F    | rs78349823  | <b>0.714,P</b> | G/A |
| 384 | SNX31    | p.D73H    | rs2187016   | <b>0.715,P</b> | C/G |
| 385 | CA6      | p.T55M    | rs2274327   | <b>0.715,P</b> | T/T |
| 386 | ABCG8    | p.D19H    | rs11887534  | <b>0.717,P</b> | G/C |
| 387 | C1orf27  | p.S251C   | rs12084264  | <b>0.717,P</b> | C/G |
| 388 | TAS2R19  | p.F290S   | rs72475480  | <b>0.718,P</b> | A/G |
| 389 | MAPKBP1  | p.V392I   | rs75869993  | <b>0.718,P</b> | G/A |
| 390 | OR5T2    | p.A195T   | rs77295387  | <b>0.718,P</b> | C/T |
| 391 | MYOM1    | p.S181P   | rs1962519   | <b>0.719,P</b> | G/G |
| 392 | MYO10    | p.R324W   | rs11750538  | <b>0.720,P</b> | A/A |
| 393 | TJP3     | p.R28H    | rs2067019   | <b>0.720,P</b> | G/A |
| 394 | DCLRE1A  | p.D317H   | rs3750898   | <b>0.720,P</b> | C/G |

|     |                  |          |             |                |     |
|-----|------------------|----------|-------------|----------------|-----|
| 395 | TGM5             | p.R81C   | rs773076654 | <b>0.720,P</b> | G/A |
| 396 | NLRP14           | p.E808K  | rs10839708  | <b>0.721,P</b> | A/A |
| 397 | TTN              | p.V3261M | rs2291311   | <b>0.721,P</b> | T/T |
| 398 | SSX5             | p.E19Q   | rs4824675   | <b>0.721,P</b> | G/G |
| 399 | DMRT2            | p.E458Q  | rs17641078  | <b>0.723,P</b> | C/C |
| 400 | OSBPL10          | p.N254D  | rs2290532   | <b>0.724,P</b> | T/C |
| 401 | NPAP1            | p.V212A  | rs3784246   | <b>0.725,P</b> | T/C |
| 402 | HK2              | p.R373W  | rs199992983 | <b>0.728,P</b> | C/T |
| 403 | CDH4             | p.G523S  | rs142900721 | <b>0.729,P</b> | G/A |
| 404 | CSMD3            | p.N3581H | rs1592624   | <b>0.730,P</b> | G/G |
| 405 | GAK              | p.D787Y  | rs34585705  | <b>0.730,P</b> | C/A |
| 406 | SIGLEC6          | p.P246S  | rs2305772   | <b>0.732,P</b> | A/A |
| 407 | KCNJ12           | p.S371R  | rs1612176   | <b>0.734,P</b> | C/G |
| 408 | DNAH9            | p.N2195S | rs3744581   | <b>0.734,P</b> | A/G |
| 409 | SERPINA7         | p.L303F  | rs1804495   | <b>0.735,P</b> | A/A |
| 410 | OR6M1            | p.T276K  | rs4936845   | <b>0.735,P</b> | T/T |
| 411 | ANGPTL8          | p.R59W   | rs2278426   | <b>0.736,P</b> | C/T |
| 412 | KRTAP6-1         | p.R43C   | rs74914596  | <b>0.736,P</b> | G/A |
| 413 | RTL1             | p.E848Q  | rs11623267  | <b>0.737,P</b> | C/G |
| 414 | TCHH             | p.L790M  | rs11803731  | <b>0.737,P</b> | T/T |
| 415 | ACOT4            | p.R57C   | rs3742819   | <b>0.738,P</b> | C/T |
| 416 | TRPA1            | p.E179K  | rs920829    | <b>0.739,P</b> | C/T |
| 417 | ERICH6B          | p.V653F  | rs1536207   | <b>0.740,P</b> | C/A |
| 418 | DNAH1            | p.V3406I | rs201752275 | <b>0.740,P</b> | G/A |
| 419 | RP1L1            | p.H222P  | rs4388421   | <b>0.740,P</b> | G/G |
| 420 | ARHGEF28         | p.R585K  | rs2973566   | <b>0.744,P</b> | G/A |
| 421 | DLGAP4           | p.R747Q  | rs41274714  | <b>0.744,P</b> | G/A |
| 422 | CP               | p.T841R  | rs56033670  | <b>0.744,P</b> | G/C |
| 423 | OR51I1           | p.R302C  | rs61736831  | <b>0.745,P</b> | G/A |
| 424 | C9orf173         | p.L218F  | rs61759822  | <b>0.745,P</b> | T/T |
| 425 | OR7A10           | p.L44I   | rs12985894  | <b>0.746,P</b> | G/T |
| 426 | IMMT             | p.P124S  | rs1050301   | <b>0.747,P</b> | G/A |
| 427 | ZNF234           | p.V420I  | rs201556875 | <b>0.747,P</b> | G/A |
| 428 | KIAA0753         | p.P566L  | rs2304977   | <b>0.747,P</b> | A/A |
| 429 | YY1AP1           | p.D231N  | rs41264945  | <b>0.747,P</b> | C/T |
| 430 | C2orf74          | p.Y37D   | rs1729674   | <b>0.748,P</b> | T/G |
| 431 | MAP7             | p.R580W  | rs2076190   | <b>0.751,P</b> | A/A |
| 432 | ZNF681           | p.K336R  | rs7245561   | <b>0.751,P</b> | T/C |
| 433 | HTR3D            | p.R225H  | rs1000952   | <b>0.753,P</b> | A/A |
| 434 | ALNT4,POC1B-GALN | p.V334I  | rs2230283   | <b>0.753,P</b> | C/T |
| 435 | TET2             | p.L1721W | rs34402524  | <b>0.754,P</b> | T/G |
| 436 | ZNF19            | p.Q218H  | rs8050871   | <b>0.754,P</b> | G/G |
| 437 | UQCRH            | p.E22G   | rs41292543  | <b>0.755,P</b> | A/G |
| 438 | USP6             | p.R912Q  | rs9899177   | <b>0.755,P</b> | G/A |
| 439 | RASIP1           | p.R601C  | rs2287922   | <b>0.756,P</b> | A/A |



|     |                 |          |             |                |     |
|-----|-----------------|----------|-------------|----------------|-----|
| 440 | CERS2           | p.E115A  | rs267738    | <b>0.756,P</b> | T/G |
| 441 | KIR3DL1,KIR3DS1 | p.I75L   | rs1049150   | <b>0.757,P</b> | A/T |
| 442 | SH3RF3          | p.A15T   | rs34609468  | <b>0.757,P</b> | G/A |
| 443 | VPS41           | p.E432K  | rs62444122  | <b>0.757,P</b> | C/T |
| 444 | TAS2R38         | p.I296V  | rs10246939  | <b>0.759,P</b> | T/C |
| 445 | SLC39A8         | p.L449F  | rs112519623 | <b>0.759,P</b> | G/A |
| 446 | POU5F1B         | p.G176E  | rs6998061   | <b>0.759,P</b> | G/A |
| 447 | COL6A6          | p.I916T  | rs61730505  | <b>0.760,P</b> | T/C |
| 448 | SFTPC           | p.T138N  | rs4715      | <b>0.761,P</b> | C/A |
| 449 | LILRA1          | p.V387L  | rs116973751 | <b>0.764,P</b> | G/T |
| 450 | OR13C5          | p.S18F   | rs1851722   | <b>0.764,P</b> | G/A |
| 451 | AQP12B          | p.R23Q   | rs4081909   | <b>0.764,P</b> | C/T |
| 452 | CATSPERD        | p.G639R  | rs61180947  | <b>0.764,P</b> | G/A |
| 453 | CPN1            | p.G178D  | rs61751507  | <b>0.764,P</b> | C/T |
| 454 | OR2Y1           | p.V200L  | rs10464105  | <b>0.765,P</b> | G/G |
| 455 | OR4A47          | p.S236P  | rs76991989  | <b>0.765,P</b> | T/C |
| 456 | PNPLA2          | p.L481P  | rs1138693   | <b>0.766,P</b> | C/C |
| 457 | DDX58           | p.D580E  | rs17217280  | <b>0.766,P</b> | A/T |
| 458 | SLCO5A1         | p.G594V  | rs34698405  | <b>0.767,P</b> | C/A |
| 459 | IGSF10          | p.Y150D  | rs7619322   | <b>0.768,P</b> | C/C |
| 460 | HLA-A           | p.P217A  | rs1059563   | <b>0.769,P</b> | C/G |
| 461 | PPP2R3B         | p.A519V  | rs1133520   | <b>0.769,P</b> | G/A |
| 462 | TPCN2           | p.V219I  | rs72928978  | <b>0.769,P</b> | G/A |
| 463 | FHL2            | p.T171M  | rs727504674 | <b>0.770,P</b> | G/A |
| 464 | KRT76           | p.A359T  | rs6580904   | <b>0.771,P</b> | C/T |
| 465 | EPG5            | p.S1083L | rs78339727  | <b>0.771,P</b> | G/A |
| 466 | NQO1            | p.R139W  | rs1131341   | <b>0.773,P</b> | G/A |
| 467 | OPRM1           | p.N133D  | rs1799971   | <b>0.775,P</b> | A/G |
| 468 | C2orf16         | p.I774V  | rs1919128   | <b>0.775,P</b> | A/G |
| 469 | OTOP3           | p.M1T    | rs368367098 | <b>0.775,P</b> | T/C |
| 470 | PNMAL2          | p.V401I  | rs3745790   | <b>0.775,P</b> | C/T |
| 471 | IL37            | p.G31V   | rs3811046   | <b>0.775,P</b> | G/T |
| 472 | MRGPPE          | p.G160S  | rs4391795   | <b>0.776,P</b> | C/T |
| 473 | KIR3DL1         | p.C364Y  | rs45542639  | <b>0.776,P</b> | G/A |
| 474 | PSMB4           | p.I234T  | rs4603      | <b>0.776,P</b> | T/C |
| 475 | SDCBP2          | p.R223C  | rs1048621   | <b>0.777,P</b> | A/A |
| 476 | OR7C1           | p.V247L  | rs73004304  | <b>0.777,P</b> | C/G |
| 477 | GALNT9          | p.A400T  | rs11246991  | <b>0.778,P</b> | C/T |
| 478 | VCAN            | p.K349E  | rs61749613  | <b>0.778,P</b> | A/G |
| 479 | ALKBH3          | p.D228E  | rs1130290   | <b>0.779,P</b> | C/G |
| 480 | ACAN            | p.S939T  | rs938609    | <b>0.779,P</b> | T/A |
| 481 | MAVS            | p.Q198K  | rs7262903   | <b>0.780,P</b> | C/A |
| 482 | CORO2B          | p.L189Q  | rs138122643 | <b>0.781,P</b> | T/A |
| 483 | TRPM8           | p.Y251C  | rs17868387  | <b>0.781,P</b> | A/G |
| 484 | SMYD4           | p.P797H  | rs58337165  | <b>0.781,P</b> | G/T |

|     |           |          |              |                |     |
|-----|-----------|----------|--------------|----------------|-----|
| 485 | NRAP      | p.N519I  | rs2270182    | <b>0.783,P</b> | T/A |
| 486 | OXCT2     | p.D494N  | rs150795467  | <b>0.784,P</b> | C/T |
| 487 | ALG9      | p.V289I  | rs10502151   | <b>0.785,P</b> | C/T |
| 488 | FAM35A    | p.S550C  | rs11202365   | <b>0.785,P</b> | T/T |
| 489 | KIF9      | p.R638W  | rs2276853    | <b>0.785,P</b> | A/A |
| 490 | MUC20     | p.A296T  | rs572650436  | <b>0.785,P</b> | G/A |
| 491 | POM121L12 | p.A3S    | rs72598684   | <b>0.785,P</b> | T/T |
| 492 | ZFR2      | p.R521C  | rs61742027   | <b>0.786,P</b> | G/A |
| 493 | TRAPPC12  | p.S301G  | rs11686212   | <b>0.787,P</b> | A/G |
| 494 | DDX51     | p.Q295R  | rs1133690    | <b>0.788,P</b> | C/C |
| 495 | HLA-DRB5  | p.D40H   | rs1136752    | <b>0.788,P</b> | C/G |
| 496 | SVIL      | p.L1064R | rs199726033  | <b>0.789,P</b> | A/C |
| 497 | MKI67     | p.T2868S | rs2071496    | <b>0.789,P</b> | G/C |
| 498 | CCDC93    | p.R179C  | rs33975708   | <b>0.790,P</b> | G/A |
| 499 | CAMK2N2   | p.K47T   | rs1332780006 | <b>0.792,P</b> | T/G |
| 500 | GEMIN5    | p.R1016C | rs61749643   | <b>0.792,P</b> | G/A |
| 501 | SPATA31A6 | p.P1102L | rs10907643   | <b>0.794,P</b> | T/T |
| 502 | ATF7IP    | p.K538R  | rs3213764    | <b>0.794,P</b> | G/G |
| 503 | ITGA11    | p.P972L  | rs4777035    | <b>0.794,P</b> | A/A |
| 504 | CABLES2   | p.V381L  | rs61742254   | <b>0.794,P</b> | C/G |
| 505 | KCNMB1    | p.A27V   | N/A          | <b>0.797,P</b> | G/A |
| 506 | EVC       | p.D95G   | rs41269547   | <b>0.797,P</b> | A/G |
| 507 | GRIN3A    | p.G487R  | rs10989589   | <b>0.799,P</b> | C/T |
| 508 | MKI67     | p.E497D  | rs11016076   | <b>0.799,P</b> | C/G |
| 509 | HSPB9     | p.Q2P    | rs1122326    | <b>0.799,P</b> | A/C |
| 510 | NINJ1     | p.A110D  | rs2275848    | <b>0.799,P</b> | G/T |
| 511 | DISC1     | p.S736C  | rs821616     | <b>0.799,P</b> | A/T |
| 512 | MUC16     | p.T2506A | rs1609458    | <b>0.801,P</b> | T/C |
| 513 | ALPK1     | p.G565D  | rs2074388    | <b>0.801,P</b> | G/A |
| 514 | KLRB1     | p.I168T  | rs1135816    | <b>0.802,P</b> | G/G |
| 515 | GFRA2     | p.L462Q  | rs1128397    | <b>0.804,P</b> | A/T |
| 516 | WBSCR27   | p.S171W  | rs13232463   | <b>0.804,P</b> | C/C |
| 517 | ESYT2     | p.S584P  | rs2305475    | <b>0.804,P</b> | A/G |
| 518 | TICRR     | p.R1885C | rs3743372    | <b>0.804,P</b> | C/T |
| 519 | SEC16B    | p.Q845H  | rs7522194    | <b>0.804,P</b> | C/A |
| 520 | C2CD2L    | p.S466T  | rs1946807141 | <b>0.805,P</b> | T/A |
| 521 | PCDHGB3   | p.L715M  | rs138338803  | <b>0.805,P</b> | C/A |
| 522 | KIF24     | p.W218L  | rs17350674   | <b>0.806,P</b> | C/A |
| 523 | SARDH     | p.R614H  | rs2073817    | <b>0.806,P</b> | C/T |
| 524 | ADGRF2    | p.L256M  | rs17541107   | <b>0.807,P</b> | T/A |
| 525 | P2RX7     | p.Y155H  | rs208294     | <b>0.808,P</b> | T/C |
| 526 | CR1L      | p.L491P  | rs2796257    | <b>0.808,P</b> | T/C |
| 527 | SMYD4     | p.R562W  | rs11549830   | <b>0.809,P</b> | G/A |
| 528 | MMS22L    | p.T564M  | rs9481410    | <b>0.809,P</b> | G/A |
| 529 | ANXA2R    | p.Q119R  | rs1054428    | <b>0.810,P</b> | C/C |

|     |           |          |             |                |     |
|-----|-----------|----------|-------------|----------------|-----|
| 530 | MAGEC3    | p.A328T  | rs176026    | <b>0.811,P</b> | A/A |
| 531 | KRT13     | p.A187V  | rs9891361   | <b>0.811,P</b> | A/A |
| 532 | VTA1      | p.C38S   | rs2232300   | <b>0.812,P</b> | T/A |
| 533 | MUS81     | p.R37H   | rs13817     | <b>0.813,P</b> | G/A |
| 534 | SACS      | p.N232K  | rs2031640   | <b>0.813,P</b> | A/T |
| 535 | PLA2G7    | p.V379A  | rs1051931   | <b>0.814,P</b> | G/G |
| 536 | TUBGCP6   | p.S1364C | rs5771107   | <b>0.815,P</b> | T/A |
| 537 | SLC6A15   | p.E684D  | rs145111717 | <b>0.816,P</b> | C/A |
| 538 | OR5V1     | p.L23W   | rs6930033   | <b>0.817,P</b> | A/C |
| 539 | OR13C5    | p.L69M   | rs7042502   | <b>0.817,P</b> | A/T |
| 540 | RET       | p.R982C  | rs17158558  | <b>0.818,P</b> | C/T |
| 541 | TNXB      | p.N4055I | rs17421133  | <b>0.819,P</b> | T/A |
| 542 | KRT40     | p.E286D  | rs721958    | <b>0.819,P</b> | G/G |
| 543 | MUC16     | p.S1953P | rs1108380   | <b>0.820,P</b> | A/G |
| 544 | HJURP     | p.S549C  | rs3821238   | <b>0.821,P</b> | G/C |
| 545 | BCLAF1    | p.S209C  | rs6940018   | <b>0.823,P</b> | G/C |
| 546 | NPW       | p.E100Q  | rs11248906  | <b>0.824,P</b> | C/C |
| 547 | ALMS1     | p.S2101L | rs28730854  | <b>0.824,P</b> | C/T |
| 548 | IZUMO4    | p.Y137F  | rs45506200  | <b>0.824,P</b> | A/T |
| 549 | ZAN       | p.A2511V | rs76325149  | <b>0.824,P</b> | C/T |
| 550 | KLHL38    | p.C504Y  | rs11779866  | <b>0.825,P</b> | C/T |
| 551 | CFB       | p.R32W   | rs12614     | <b>0.825,P</b> | C/T |
| 552 | ITGAE     | p.R950W  | rs1716      | <b>0.825,P</b> | G/A |
| 553 | PCDHB2    | p.F516L  | rs143150465 | <b>0.826,P</b> | C/A |
| 554 | FOXA1     | p.E269V  | rs757337935 | <b>0.827,P</b> | T/A |
| 555 | PRTN3     | p.R249H  | rs150802678 | <b>0.828,P</b> | G/A |
| 556 | NKAIN4    | p.A131D  | rs2236194   | <b>0.828,P</b> | G/T |
| 557 | EXOC3L4   | p.R77W   | rs2297067   | <b>0.828,P</b> | C/T |
| 558 | PLXNA2    | p.E369G  | rs4844658   | <b>0.828,P</b> | T/C |
| 559 | OR51B5    | p.T78K   | rs57273781  | <b>0.828,P</b> | G/T |
| 560 | EYA4      | p.G277S  | rs9493627   | <b>0.828,P</b> | G/A |
| 561 | TPSG1     | p.R193H  | rs143120059 | <b>0.829,P</b> | T/T |
| 562 | MUC4      | p.N3782K | rs2550240   | <b>0.829,P</b> | C/C |
| 563 | NACAD     | p.C1152F | rs3735493   | <b>0.829,P</b> | C/A |
| 564 | SPATA31E1 | p.D1202G | rs11789780  | <b>0.830,P</b> | G/G |
| 565 | SERPINB11 | p.A181T  | rs1506418   | <b>0.830,P</b> | G/A |
| 566 | PYCRL     | p.V117M  | rs2242089   | <b>0.830,P</b> | C/T |
| 567 | MLIP      | p.S855T  | rs6934690   | <b>0.831,P</b> | A/A |
| 568 | DNHD1     | p.V2374M | rs11606889  | <b>0.832,P</b> | G/A |
| 569 | SH2D1B    | p.N122K  | rs34001279  | <b>0.832,P</b> | G/T |
| 570 | ODF4      | p.R77C   | rs73250854  | <b>0.833,P</b> | C/T |
| 571 | CEP131    | p.A1020T | rs117616373 | <b>0.834,P</b> | C/T |
| 572 | SLC25A5   | p.I79F   | rs141428607 | <b>0.834,P</b> | A/T |
| 573 | ENDOD1    | p.G446V  | rs3740861   | <b>0.834,P</b> | G/T |
| 574 | GOLGA6L2  | p.R317W  | rs59122400  | <b>0.835,P</b> | A/A |

|     |          |          |              |                |     |
|-----|----------|----------|--------------|----------------|-----|
| 575 | OR8A1    | p.T133R  | rs55861866   | <b>0.836,P</b> | C/G |
| 576 | APOL5    | p.T323M  | rs2076672    | <b>0.837,P</b> | C/T |
| 577 | OR2M2    | p.R220G  | rs4244171    | <b>0.838,P</b> | C/G |
| 578 | KRT75    | p.M438T  | rs764819403  | <b>0.838,P</b> | A/G |
| 579 | TCOF1    | p.P1176R | rs1136103    | <b>0.839,P</b> | C/G |
| 580 | EYS      | p.E641V  | rs17411795   | <b>0.839,P</b> | T/A |
| 581 | HLA-A    | p.E277Q  | rs2231095    | <b>0.840,P</b> | C/C |
| 582 | ERCC6L2  | p.V592A  | rs2274654    | <b>0.840,P</b> | T/C |
| 583 | ACAN     | p.S930I  | rs938608     | <b>0.840,P</b> | G/T |
| 584 | OR10J1   | p.I103M  | rs12048482   | <b>0.841,P</b> | A/G |
| 585 | EML5     | p.I269V  | rs17188228   | <b>0.841,P</b> | T/C |
| 586 | ACADL    | p.K333Q  | rs2286963    | <b>0.841,P</b> | T/G |
| 587 | PRR29    | p.T24S   | rs62070903   | <b>0.841,P</b> | C/G |
| 588 | GRWD1    | p.A64V   | rs1971402770 | <b>0.842,P</b> | C/T |
| 589 | CDH23    | p.G490A  | rs1227049    | <b>0.842,P</b> | G/C |
| 590 | MS4A15   | p.S20G   | rs12363342   | <b>0.842,P</b> | A/G |
| 591 | NEK4     | p.P225A  | rs1029871    | <b>0.843,P</b> | G/C |
| 592 | HLA-DQA1 | p.R70W   | rs1142326    | <b>0.843,P</b> | T/T |
| 593 | OR10A6   | p.V140G  | rs7933807    | <b>0.843,P</b> | A/C |
| 594 | TGOLN2   | p.R259W  | rs4247303    | <b>0.844,P</b> | G/A |
| 595 | CARD6    | p.S86L   | rs10512747   | <b>0.845,P</b> | C/T |
| 596 | TAS2R19  | p.C264Y  | rs76970958   | <b>0.845,P</b> | C/T |
| 597 | ECHDC3   | p.A69T   | rs4750090    | <b>0.846,P</b> | A/A |
| 598 | RPL22L1  | p.V96F   | rs13462      | <b>0.847,P</b> | C/A |
| 599 | INMT     | p.E219G  | rs2302340    | <b>0.847,P</b> | A/G |
| 600 | SPANXB1  | p.D86H   | rs1218473051 | <b>0.848,P</b> | G/C |
| 601 | C21orf58 | p.P194S  | rs13047478   | <b>0.848,P</b> | G/A |
| 602 | MS4A6E   | p.V47F   | rs2304933    | <b>0.849,P</b> | G/T |
| 603 | CRTC3    | p.S72N   | rs8033595    | <b>0.850,P</b> | G/A |
| 604 | FMN2     | p.P962L  | rs111896385  | <b>0.851,P</b> | T/T |
| 605 | MEFV     | p.E148Q  | rs3743930    | <b>0.851,P</b> | C/G |
| 606 | NT5C3B   | p.S213C  | rs1046404    | <b>0.852,P</b> | C/C |
| 607 | LYSMD4   | p.A181G  | rs2061007    | <b>0.852,P</b> | G/C |
| 608 | PRR22    | p.P248L  | rs34572934   | <b>0.852,P</b> | G/A |
| 609 | ZNF705A  | p.K142Q  | rs10743253   | <b>0.854,P</b> | A/C |
| 610 | KRT82    | p.T458M  | rs2658658    | <b>0.854,P</b> | G/A |
| 611 | OBSCN    | p.A3729T | rs437129     | <b>0.855,P</b> | G/A |
| 612 | ANKRD62  | p.E406K  | rs4519391    | <b>0.855,P</b> | A/A |
| 613 | NEB      | p.K1027N | rs6735208    | <b>0.855,P</b> | A/A |
| 614 | ZNF880   | p.V12M   | rs14048      | <b>0.856,P</b> | G/A |
| 615 | BANK1    | p.A383T  | rs3733197    | <b>0.856,P</b> | G/A |
| 616 | C3orf18  | p.A162V  | rs1034405    | <b>0.857,P</b> | A/A |
| 617 | PALD1    | p.R721C  | rs3740447    | <b>0.857,P</b> | C/T |
| 618 | BRWD1    | p.S1511P | rs2183573    | <b>0.858,P</b> | G/G |
| 619 | CTBP2    | p.L392P  | rs3781412    | <b>0.858,P</b> | A/G |

|     |          |          |              |                |     |
|-----|----------|----------|--------------|----------------|-----|
| 620 | CCDC183  | p.L113R  | rs4546744    | <b>0.858,P</b> | T/G |
| 621 | MLH3     | p.R1152C | rs569011240  | <b>0.858,P</b> | G/A |
| 622 | DOCK8    | p.R1238H | rs767874435  | <b>0.858,P</b> | G/A |
| 623 | CCDC96   | p.Q231H  | rs374259671  | <b>0.859,P</b> | C/G |
| 624 | SHROOM1  | p.T488N  | rs769565321  | <b>0.859,P</b> | G/T |
| 625 | SMTNL1   | p.R345G  | rs12223229   | <b>0.859,P</b> | C/G |
| 626 | PLEKHG4B | p.R1502G | rs12519352   | <b>0.859,P</b> | C/G |
| 627 | RREB1    | p.G195R  | rs1334576    | <b>0.859,P</b> | G/A |
| 628 | CCDC34   | p.E264A  | rs17244028   | <b>0.860,P</b> | T/G |
| 629 | APOL1    | p.E166K  | rs2239785    | <b>0.860,P</b> | A/A |
| 630 | OR10P1   | p.V200M  | rs7970885    | <b>0.860,P</b> | G/A |
| 631 | CLEC18A  | p.T151M  | rs75776403   | <b>0.861,P</b> | C/T |
| 632 | OBSCN    | p.V3149M | rs1188697    | <b>0.862,P</b> | G/A |
| 633 | HLA-DRB5 | p.G30V   | rs146966122  | <b>0.862,P</b> | C/A |
| 634 | USP35    | p.V236M  | rs2510044    | <b>0.862,P</b> | G/A |
| 635 | PLEKHG4B | p.R1432Q | rs4956987    | <b>0.862,P</b> | G/A |
| 636 | TTC29    | p.A302T  | rs10013280   | <b>0.863,P</b> | C/T |
| 637 | ZNF208   | p.E282K  | rs2007506    | <b>0.863,P</b> | C/T |
| 638 | PKD1L2   | p.L2119I | rs8050204    | <b>0.863,P</b> | G/T |
| 639 | MYH7B    | p.L1663F | rs1319423309 | <b>0.864,P</b> | C/T |
| 640 | OR5B3    | p.A181T  | rs11229411   | <b>0.864,P</b> | C/T |
| 641 | RNASEL   | p.R462Q  | rs486907     | <b>0.864,P</b> | T/T |
| 642 | OR10H5   | p.A224D  | rs61745514   | <b>0.864,P</b> | C/A |
| 643 | HLA-A    | p.I166T  | rs1059516    | <b>0.865,P</b> | T/C |
| 644 | HELT     | p.L62V   | rs1078461    | <b>0.866,P</b> | C/G |
| 645 | OR51M1   | p.L257R  | rs2736531    | <b>0.866,P</b> | T/G |
| 646 | AMPH     | p.K496T  | rs35024632   | <b>0.866,P</b> | T/G |
| 647 | ERV3-1   | p.N569S  | rs4717229    | <b>0.866,P</b> | C/C |
| 648 | S100P    | p.V14I   | rs187031070  | <b>0.867,P</b> | G/A |
| 649 | CSNK2A3  | p.I133T  | rs2071460    | <b>0.867,P</b> | G/G |
| 650 | TRIML1   | p.E132K  | rs13131525   | <b>0.868,P</b> | G/A |
| 651 | OSCAR    | p.C105W  | rs1488511419 | <b>0.870,P</b> | G/C |
| 652 | CST9     | p.L48F   | rs2983640    | <b>0.870,P</b> | G/A |
| 653 | BMP2     | p.R190S  | rs235768     | <b>0.871,P</b> | T/T |
| 654 | SENP7    | p.Q612H  | rs2433031    | <b>0.871,P</b> | T/A |
| 655 | ZNF750   | p.P288L  | rs35653278   | <b>0.871,P</b> | G/A |
| 656 | DHDH     | p.G282R  | rs3765148    | <b>0.871,P</b> | G/A |
| 657 | HLA-A    | p.P208A  | rs1136741    | <b>0.872,P</b> | C/G |
| 658 | PLEKHH1  | p.G677R  | rs61534804   | <b>0.872,P</b> | G/A |
| 659 | ARHGEF4  | p.R650C  | rs61758709   | <b>0.872,P</b> | C/T |
| 660 | NLRP3    | p.L331V  | rs202077909  | <b>0.873,P</b> | C/G |
| 661 | ATP10A   | p.T532M  | rs2066703    | <b>0.873,P</b> | G/A |
| 662 | CTBP2    | p.R298Q  | rs3781411    | <b>0.873,P</b> | C/T |
| 663 | OR12D2   | p.V47F   | rs9257834    | <b>0.873,P</b> | G/T |
| 664 | COL6A3   | p.E1386K | rs146092501  | <b>0.874,P</b> | C/T |

|     |            |           |             |                |     |
|-----|------------|-----------|-------------|----------------|-----|
| 665 | CCDC141    | p.E382D   | rs34883828  | <b>0.875,P</b> | C/A |
| 666 | EPSTI1     | p.N399K   | rs1044856   | <b>0.876,P</b> | A/T |
| 667 | SPATA24    | p.E176E   | rs10900862  | <b>0.876,P</b> | T/T |
| 668 | TPSD1      | p.A127V   | rs143993373 | <b>0.876,P</b> | C/T |
| 669 | OR2D2      | p.S148P   | rs1965209   | <b>0.876,P</b> | A/G |
| 670 | KCNJ12     | p.E378K   | rs78547883  | <b>0.876,P</b> | G/A |
| 671 | TTN        | p.R24947C | rs744426    | <b>0.877,P</b> | G/A |
| 672 | RP1L1      | p.E2070V  | rs11782670  | <b>0.878,P</b> | A/A |
| 673 | C6orf118   | p.I256M   | rs510579    | <b>0.878,P</b> | A/C |
| 674 | SPEG       | p.P2687T  | rs13026308  | <b>0.879,P</b> | C/A |
| 675 | FLT3       | p.T227M   | rs1933437   | <b>0.879,P</b> | G/A |
| 676 | SYNPO2L    | p.G2S     | rs60632610  | <b>0.879,P</b> | C/T |
| 677 | MTCH2      | p.P290A   | rs1064608   | <b>0.881,P</b> | G/C |
| 678 | DUPD1      | p.D66N    | rs11594934  | <b>0.881,P</b> | C/T |
| 679 | ZSCAN5A    | p.G337V   | rs34187696  | <b>0.881,P</b> | C/A |
| 680 | TMEM99     | p.L95R    | rs1044806   | <b>0.883,P</b> | T/G |
| 681 | PKD1L3     | p.T669S   | rs35259348  | <b>0.883,P</b> | G/C |
| 682 | ADGRV1     | p.Y2232C  | rs10037067  | <b>0.885,P</b> | G/G |
| 683 | AP5B1      | p.G170V   | rs12362011  | <b>0.885,P</b> | C/A |
| 684 | HLA-DRB5   | p.Q39L    | rs201948867 | <b>0.885,P</b> | T/A |
| 685 | TPD52L3    | p.F118L   | rs3847262   | <b>0.885,P</b> | C/C |
| 686 | LRP2       | p.G4417D  | rs41268685  | <b>0.885,P</b> | C/T |
| 687 | PEAR1      | p.S381F   | rs77795865  | <b>0.885,P</b> | C/T |
| 688 | OR51F1     | p.A251V   | rs17324609  | <b>0.886,P</b> | G/A |
| 689 | COL6A6     | p.A370T   | rs9830253   | <b>0.886,P</b> | A/A |
| 690 | HSPA1L     | p.E602K   | rs2075800   | <b>0.887,P</b> | C/T |
| 691 | PNPLA7     | p.W899S   | rs61747535  | <b>0.887,P</b> | C/G |
| 692 | PRKAG1     | p.T89S    | rs1126930   | <b>0.888,P</b> | G/C |
| 693 | MTDH       | p.A78S    | rs17854373  | <b>0.888,P</b> | G/T |
| 694 | UBAP2      | p.R14Q    | rs1785506   | <b>0.889,P</b> | C/T |
| 695 | ERAP1      | p.K528R   | rs30187     | <b>0.889,P</b> | T/C |
| 696 | CEP128     | p.H732R   | rs327463    | <b>0.890,P</b> | T/C |
| 697 | ALPK2      | p.K829N   | rs3809973   | <b>0.891,P</b> | G/G |
| 698 | C5orf60    | p.W240R   | rs62405726  | <b>0.891,P</b> | A/G |
| 699 | OR11L1     | p.G108S   | rs10888257  | <b>0.892,P</b> | T/T |
| 700 | AJAP1      | p.G263R   | rs242056    | <b>0.892,P</b> | A/A |
| 701 | OLFML1     | p.T53M    | rs141351486 | <b>0.893,P</b> | C/T |
| 702 | ARHGAP1    | p.G183E   | rs775108640 | <b>0.893,P</b> | C/T |
| 703 | KHDC3L     | p.A201G   | rs561930    | <b>0.894,P</b> | G/G |
| 704 | KRTAP6-3   | p.Y51S    | rs9305426   | <b>0.894,P</b> | A/C |
| 705 | HLA-A      | p.R169H   | rs1059520   | <b>0.895,P</b> | G/A |
| 706 | MUC16      | p.R1015G  | rs17000950  | <b>0.895,P</b> | T/C |
| 707 | TCEB3B     | p.A446T   | rs3744863   | <b>0.895,P</b> | C/T |
| 708 | KRTAP10-11 | p.R269C   | rs462007    | <b>0.895,P</b> | T/T |
| 709 | ESPL1      | p.S614R   | rs1318648   | <b>0.896,P</b> | C/A |



|     |             |          |              |                |     |
|-----|-------------|----------|--------------|----------------|-----|
| 710 | PSPH        | p.G90S   | rs75395437   | <b>0.896,P</b> | C/T |
| 711 | LIPF        | p.T138A  | rs814628     | <b>0.896,P</b> | A/G |
| 712 | TTYH2       | p.A409E  | rs9892705    | <b>0.896,P</b> | C/A |
| 713 | PCDHGB5     | p.S594L  | rs141997055  | <b>0.897,P</b> | C/T |
| 714 | GHR         | p.I544L  | rs6180       | <b>0.897,P</b> | C/C |
| 715 | ADGRF2      | p.S49P   | rs13212023   | <b>0.898,P</b> | T/C |
| 716 | MRM1        | p.C120S  | rs78943308   | <b>0.898,P</b> | G/C |
| 717 | OR10AD1     | p.Y279H  | rs11168459   | <b>0.899,P</b> | A/G |
| 718 | KRR1        | p.R134Q  | rs11540407   | <b>0.899,P</b> | T/T |
| 719 | OR9G9,OR9G1 | p.G193C  | rs12421330   | <b>0.899,P</b> | G/T |
| 720 | TMEM41A     | p.G236E  | rs139252054  | <b>0.901,P</b> | C/T |
| 721 | ZNF736      | p.A209E  | rs11976837   | <b>0.902,P</b> | C/A |
| 722 | RNF43       | p.R117H  | rs2257205    | <b>0.902,P</b> | C/T |
| 723 | MEGF6       | p.G1137A | rs4648506    | <b>0.902,P</b> | C/G |
| 724 | HLA-DRB1    | p.R42W   | rs1136758    | <b>0.903,P</b> | A/A |
| 725 | GIPR        | p.E354Q  | rs1800437    | <b>0.904,P</b> | C/C |
| 726 | TUBA3E      | p.R156W  | rs62165074   | <b>0.905,P</b> | G/A |
| 727 | CELSR3      | p.Q331R  | rs1051589441 | <b>0.906,P</b> | T/C |
| 728 | SGK223      | p.G1226S | rs13269488   | <b>0.906,P</b> | C/T |
| 729 | ALPK2       | p.H1174P | rs3809977    | <b>0.906,P</b> | G/G |
| 730 | SIM2        | p.L483M  | rs2073601    | <b>0.908,P</b> | A/A |
| 731 | CDRT1       | p.N644H  | rs79385100   | <b>0.908,P</b> | T/G |
| 732 | RNMTL1      | p.V339D  | rs80220493   | <b>0.908,P</b> | T/A |
| 733 | AHNAK2      | p.P3336L | rs10438247   | <b>0.909,D</b> | A/A |
| 734 | OTOGL       | p.N2237S | rs1551122    | <b>0.910,D</b> | G/G |
| 735 | ADH7        | p.G100A  | rs1573496    | <b>0.910,D</b> | C/G |
| 736 | KRT1        | p.A454S  | rs17678945   | <b>0.910,D</b> | C/A |
| 737 | WSCD2       | p.T266I  | rs3764002    | <b>0.910,D</b> | C/T |
| 738 | PCDH15      | p.D440A  | rs4935502    | <b>0.910,D</b> | T/G |
| 739 | ANGEL1      | p.F515C  | rs2075773    | <b>0.911,D</b> | A/C |
| 740 | DNAH12      | p.D1572N | rs6773904    | <b>0.911,D</b> | C/T |
| 741 | RBM46       | p.I126M  | rs79167802   | <b>0.911,D</b> | T/G |
| 742 | SNAPC2      | p.L118V  | rs475002     | <b>0.912,D</b> | C/G |
| 743 | MAN2B2      | p.T892M  | rs61729241   | <b>0.912,D</b> | C/T |
| 744 | MUC3A       | p.P2890L | rs144580177  | <b>0.913,D</b> | C/T |
| 745 | PGPEP1L     | p.P3L    | rs2593051    | <b>0.913,D</b> | A/A |
| 746 | MYO15A      | p.Y2682F | rs712270     | <b>0.913,D</b> | A/T |
| 747 | FAM186A     | p.K187Q  | rs12303082   | <b>0.914,D</b> | T/G |
| 748 | ZNF208      | p.P452T  | rs12975751   | <b>0.914,D</b> | G/T |
| 749 | GOLGA4      | p.Q1050K | rs11718848   | <b>0.915,D</b> | C/A |
| 750 | HLA-DRB1    | p.T80R   | rs1059582    | <b>0.916,D</b> | G/C |
| 751 | FBLIM1      | p.S191F  | rs10927851   | <b>0.916,D</b> | C/T |
| 752 | CASC5       | p.K1285E | rs17747633   | <b>0.916,D</b> | A/G |
| 753 | SLC35G5     | p.G46D   | rs6990563    | <b>0.916,D</b> | G/A |
| 754 | PTPRQ       | p.V645D  | rs10778752   | <b>0.917,D</b> | A/A |

|     |           |          |              |                |     |
|-----|-----------|----------|--------------|----------------|-----|
| 755 | ZNF880    | p.K471R  | rs55748277   | <b>0.917,D</b> | A/G |
| 756 | CPA4      | p.A282T  | rs570075096  | <b>0.917,D</b> | G/A |
| 757 | OR51B2    | p.L134F  | rs10837814   | <b>0.918,D</b> | G/A |
| 758 | KLLN      | p.R128G  | rs201652303  | <b>0.918,D</b> | G/C |
| 759 | ZNF404    | p.R474C  | rs76311065   | <b>0.918,D</b> | G/A |
| 760 | KIAA2013  | p.S667F  | rs11555351   | <b>0.919,D</b> | G/A |
| 761 | CHI3L2    | p.A182V  | rs11556868   | <b>0.919,D</b> | C/T |
| 762 | C11orf24  | p.G97V   | rs3802746    | <b>0.919,D</b> | A/A |
| 763 | SMG6      | p.R291P  | rs1885986    | <b>0.921,D</b> | C/G |
| 764 | VASN      | p.G551R  | rs367830549  | <b>0.921,D</b> | G/A |
| 765 | NPAS4     | p.G676V  | rs1371192899 | <b>0.922,D</b> | G/T |
| 766 | HLA-DQB1  | p.R87P   | rs1130380    | <b>0.922,D</b> | G/G |
| 767 | KRTAP10-1 | p.V101M  | rs233319     | <b>0.922,D</b> | C/T |
| 768 | MACC1     | p.R804T  | rs3735615    | <b>0.922,D</b> | G/G |
| 769 | IL11      | p.R112H  | rs4252548    | <b>0.922,D</b> | C/T |
| 770 | ASMTL     | p.S228P  | rs11553051   | <b>0.923,D</b> | A/G |
| 771 | MYO19     | p.N176S  | rs2306595    | <b>0.923,D</b> | T/C |
| 772 | ZFP28     | p.S141W  | rs34136271   | <b>0.923,D</b> | C/G |
| 773 | NVL       | p.V404I  | rs34631151   | <b>0.923,D</b> | C/T |
| 774 | GRIN3B    | p.T157M  | rs2240154    | <b>0.925,D</b> | C/T |
| 775 | NOL9      | p.R10W   | rs4908923    | <b>0.925,D</b> | A/A |
| 776 | MAVS      | p.S409F  | rs7269320    | <b>0.925,D</b> | C/T |
| 777 | PON1      | p.L55M   | rs854560     | <b>0.925,D</b> | A/T |
| 778 | INADL     | p.E362A  | rs1286823    | <b>0.926,D</b> | A/C |
| 779 | FBXO2     | p.K118T  | rs9614       | <b>0.926,D</b> | T/G |
| 780 | MAGEF1    | p.E236A  | rs9872799    | <b>0.926,D</b> | G/G |
| 781 | NAALADL2  | p.P622R  | rs9866564    | <b>0.927,D</b> | G/G |
| 782 | KRT81     | p.G52R   | rs2071588    | <b>0.928,D</b> | G/G |
| 783 | ITIH1     | p.E585V  | rs678        | <b>0.928,D</b> | A/T |
| 784 | OR4K17    | p.K159N  | rs8005245    | <b>0.928,D</b> | G/C |
| 785 | ZNF443    | p.K480T  | rs10402252   | <b>0.930,D</b> | G/G |
| 786 | OR13C5    | p.P79S   | rs7025570    | <b>0.931,D</b> | G/A |
| 787 | QRICH2    | p.E1036Q | rs2279052    | <b>0.932,D</b> | C/G |
| 788 | ASPM      | p.S2562G | rs41310927   | <b>0.932,D</b> | T/C |
| 789 | OR5H14    | p.G64R   | rs4241468    | <b>0.933,D</b> | A/A |
| 790 | PCDHGA8   | p.L16R   | rs726684     | <b>0.933,D</b> | T/G |
| 791 | KRT35     | p.S36P   | rs743686     | <b>0.933,D</b> | A/G |
| 792 | CPZ       | p.R19P   | rs79736750   | <b>0.933,D</b> | G/C |
| 793 | MICA      | p.R29P   | rs9380254    | <b>0.933,D</b> | G/C |
| 794 | CDCP2     | p.G244R  | rs3766465    | <b>0.934,D</b> | C/T |
| 795 | MUC16     | p.L1833F | rs4520945    | <b>0.934,D</b> | G/A |
| 796 | CELSR1    | p.S664W  | rs4823850    | <b>0.935,D</b> | C/C |
| 797 | OR9Q2     | p.C179R  | rs34337292   | <b>0.936,D</b> | T/C |
| 798 | SMYD4     | p.P382R  | rs3809875    | <b>0.936,D</b> | G/C |
| 799 | KRT79     | p.A393V  | rs17688627   | <b>0.937,D</b> | G/A |



|     |          |          |             |                |     |
|-----|----------|----------|-------------|----------------|-----|
| 800 | FARP1    | p.H644Y  | rs61730892  | <b>0.937,D</b> | C/T |
| 801 | TPSG1    | p.S138F  | rs113856625 | <b>0.939,D</b> | A/A |
| 802 | ISCU     | p.A12V   | rs2287555   | <b>0.939,D</b> | T/T |
| 803 | HPS1     | p.P167R  | rs2296434   | <b>0.939,D</b> | G/C |
| 804 | CAPN8    | p.S245Y  | rs35539373  | <b>0.939,D</b> | G/T |
| 805 | PKD1L2   | p.G129D  | rs7185774   | <b>0.939,D</b> | C/T |
| 806 | ACSM5    | p.P352R  | rs8062344   | <b>0.940,D</b> | C/G |
| 807 | KAZN     | p.E88D   | N/A         | <b>0.941,D</b> | A/C |
| 808 | MTHFR    | p.A222V  | rs1801133   | <b>0.941,D</b> | G/A |
| 809 | PYGB     | p.A303S  | rs2228976   | <b>0.941,D</b> | G/T |
| 810 | FCGR3A   | p.L66H   | rs10127939  | <b>0.942,D</b> | A/T |
| 811 | TTC21B   | p.V201M  | rs1432273   | <b>0.942,D</b> | T/T |
| 812 | ARFGAP2  | p.S364F  | N/A         | <b>0.943,D</b> | G/A |
| 813 | RABL6    | p.E382Q  | rs2811741   | <b>0.943,D</b> | G/C |
| 814 | FRG2C    | p.D143G  | rs79973298  | <b>0.943,D</b> | A/G |
| 815 | HLA-DQB1 | p.A118E  | rs9274380   | <b>0.943,D</b> | T/T |
| 816 | COL4A3   | p.P574L  | rs28381984  | <b>0.944,D</b> | T/T |
| 817 | KRT3     | p.R375G  | rs3887954   | <b>0.944,D</b> | G/C |
| 818 | SELE     | p.S149R  | rs5361      | <b>0.944,D</b> | T/G |
| 819 | OR7A17   | p.A237T  | rs13345394  | <b>0.945,D</b> | C/T |
| 820 | OR13F1   | p.T254M  | rs7030820   | <b>0.947,D</b> | C/T |
| 821 | PKD1L2   | p.P512L  | rs7205673   | <b>0.947,D</b> | A/A |
| 822 | COL17A1  | p.T210M  | rs805708    | <b>0.947,D</b> | A/A |
| 823 | SYCP2L   | p.P672S  | rs1225746   | <b>0.948,D</b> | T/T |
| 824 | LRRC15   | p.P292L  | rs13070515  | <b>0.948,D</b> | G/A |
| 825 | EXPH5    | p.R12G   | rs2640738   | <b>0.948,D</b> | T/C |
| 826 | SLC25A5  | p.G121C  | rs753913830 | <b>0.948,D</b> | G/T |
| 827 | TNXB     | p.P2412L | rs12524664  | <b>0.949,D</b> | G/A |
| 828 | EFTUD1   | p.I617V  | rs1128431   | <b>0.950,D</b> | T/C |
| 829 | USP21    | p.G321D  | rs17356051  | <b>0.950,D</b> | G/A |
| 830 | EPYC     | p.S150C  | rs17784152  | <b>0.950,D</b> | G/C |
| 831 | ITGAM    | p.R246Q  | rs199671976 | <b>0.950,D</b> | G/A |
| 832 | PLXND1   | p.L1412V | rs2625973   | <b>0.950,D</b> | A/C |
| 833 | ANXA9    | p.D166G  | rs267733    | <b>0.950,D</b> | A/G |
| 834 | RD3      | p.G57V   | rs767481165 | <b>0.950,D</b> | C/A |
| 835 | MYO18A   | p.A977V  | rs8076604   | <b>0.950,D</b> | G/A |
| 836 | HLA-DRB1 | p.K41T   | rs1136756   | <b>0.951,D</b> | T/G |
| 837 | MRPS31   | p.D279N  | rs13508     | <b>0.951,D</b> | C/T |
| 838 | AARS     | p.G931S  | rs149377346 | <b>0.951,D</b> | C/T |
| 839 | AP5B1    | p.L211F  | rs12146493  | <b>0.952,D</b> | A/A |
| 840 | CD5      | p.A471V  | rs2229177   | <b>0.952,D</b> | C/T |
| 841 | ZIM3     | p.I379V  | rs4801433   | <b>0.952,D</b> | T/C |
| 842 | AHNAK2   | p.A2015P | rs117379881 | <b>0.953,D</b> | G/G |
| 843 | WFS1     | p.R456H  | rs1801208   | <b>0.953,D</b> | G/A |
| 844 | MATN2    | p.T187M  | rs2290472   | <b>0.953,D</b> | C/T |

|     |          |          |             |                |     |
|-----|----------|----------|-------------|----------------|-----|
| 845 | ZBBX     | p.K160N  | rs4619784   | <b>0.953,D</b> | T/A |
| 846 | RGPD4    | p.W1646R | rs832352    | <b>0.953,D</b> | T/A |
| 847 | RBMX     | p.S337N  | rs35899675  | <b>0.954,D</b> | C/T |
| 848 | ERV3-1   | p.C192Y  | rs34639489  | <b>0.955,D</b> | C/T |
| 849 | BPIFA3   | p.A41E   | rs17124391  | <b>0.956,D</b> | C/A |
| 850 | TPO      | p.S398T  | rs2175977   | <b>0.956,D</b> | G/C |
| 851 | MYOC     | p.R76K   | rs2234926   | <b>0.956,D</b> | C/T |
| 852 | KIF24    | p.S837F  | rs41274041  | <b>0.956,D</b> | G/A |
| 853 | NFS1     | p.R145W  | rs148627243 | <b>0.957,D</b> | G/A |
| 854 | CCDC86   | p.Q153H  | rs2074421   | <b>0.957,D</b> | C/C |
| 855 | PFAS     | p.R811W  | rs147698247 | <b>0.958,D</b> | C/T |
| 856 | CYP2D6   | p.L213P  | rs3021082   | <b>0.958,D</b> | A/G |
| 857 | ANKDD1A  | p.K355E  | rs34988193  | <b>0.958,D</b> | A/G |
| 858 | CCDC116  | p.R122W  | rs861853    | <b>0.958,D</b> | C/T |
| 859 | ITGB4    | p.L1779P | rs871443    | <b>0.958,D</b> | T/C |
| 860 | ZC3HC1   | p.R342H  | rs11556924  | <b>0.959,D</b> | C/T |
| 861 | THAP7    | p.E69Q   | rs145388226 | <b>0.959,D</b> | C/G |
| 862 | TSPAN32  | p.R164C  | rs148601311 | <b>0.959,D</b> | C/T |
| 863 | IDI1     | p.G12A   | rs4880760   | <b>0.959,D</b> | C/G |
| 864 | FFAR3    | p.Y249C  | rs763450506 | <b>0.959,D</b> | A/G |
| 865 | PLCE1    | p.R548L  | rs17417407  | <b>0.960,D</b> | G/T |
| 866 | NEMF     | p.S257C  | rs3100906   | <b>0.960,D</b> | A/A |
| 867 | SRBD1    | p.K811R  | rs3755072   | <b>0.960,D</b> | T/C |
| 868 | ALPK2    | p.P1449S | rs3809982   | <b>0.960,D</b> | A/A |
| 869 | SLX4     | p.S1271F | rs3810813   | <b>0.960,D</b> | G/A |
| 870 | MOV10L1  | p.R182C  | rs3810971   | <b>0.960,D</b> | C/T |
| 871 | FAM169A  | p.E511K  | rs76455982  | <b>0.960,D</b> | C/T |
| 872 | OR52I2   | p.T167M  | rs1847632   | <b>0.961,D</b> | C/T |
| 873 | USP16    | p.Q141H  | rs2274802   | <b>0.961,D</b> | A/T |
| 874 | EXO1     | p.N279S  | rs4149909   | <b>0.961,D</b> | A/G |
| 875 | ACSM1    | p.A176P  | rs61740631  | <b>0.961,D</b> | C/G |
| 876 | SPECC1   | p.S274R  | rs9908032   | <b>0.961,D</b> | C/G |
| 877 | ACACB    | p.D1481V | rs113524436 | <b>0.962,D</b> | A/T |
| 878 | SLC45A2  | p.L374F  | rs16891982  | <b>0.962,D</b> | C/G |
| 879 | HLA-DRB5 | p.K41T   | rs200581589 | <b>0.962,D</b> | T/G |
| 880 | OR52N4   | p.Y170S  | rs75108386  | <b>0.962,D</b> | A/C |
| 881 | CCDC22   | p.R384C  | rs143790434 | <b>0.963,D</b> | T/T |
| 882 | ARHGEF37 | p.P489L  | rs9324624   | <b>0.963,D</b> | T/T |
| 883 | TRAPPC5  | p.R7C    | rs753176463 | <b>0.964,D</b> | C/T |
| 884 | C6orf118 | p.G271E  | rs17852379  | <b>0.964,D</b> | C/T |
| 885 | CNOT1    | p.R299Q  | rs34830321  | <b>0.964,D</b> | C/T |
| 886 | TRIM58   | p.T374M  | rs3811444   | <b>0.964,D</b> | T/T |
| 887 | FAM186A  | p.M2193I | rs6580742   | <b>0.964,D</b> | C/T |
| 888 | OR6C68   | p.F110I  | rs7304753   | <b>0.964,D</b> | T/A |
| 889 | CROCC    | p.D586H  | rs9435714   | <b>0.964,D</b> | G/C |

|     |           |          |             |                |     |
|-----|-----------|----------|-------------|----------------|-----|
| 890 | ZNF286B   | p.T490S  | rs9912644   | <b>0.964,D</b> | G/C |
| 891 | FSIP1     | p.G528A  | rs16969386  | <b>0.965,D</b> | C/G |
| 892 | LAMA2     | p.A2587V | rs2229848   | <b>0.965,D</b> | T/T |
| 893 | P3H3      | p.R304C  | rs35359746  | <b>0.965,D</b> | C/T |
| 894 | RNF213    | p.L4649V | rs61745599  | <b>0.965,D</b> | C/G |
| 895 | HJURP     | p.E723G  | rs10511     | <b>0.966,D</b> | T/C |
| 896 | FKBP9     | p.V367M  | rs150348129 | <b>0.966,D</b> | G/A |
| 897 | MUC16     | p.S5885F | rs1862458   | <b>0.966,D</b> | G/A |
| 898 | LKAAEAR1  | p.G9W    | rs4431000   | <b>0.966,D</b> | A/A |
| 899 | NPSR1     | p.S241R  | rs727162    | <b>0.966,D</b> | C/G |
| 900 | TRPM1     | p.A486V  | rs751743414 | <b>0.966,D</b> | G/A |
| 901 | ZNF764    | p.A332V  | rs17850402  | <b>0.967,D</b> | G/A |
| 902 | ADAMTSL4  | p.R87P   | rs199599791 | <b>0.968,D</b> | G/C |
| 903 | LRRC43    | p.Q71K   | rs11060094  | <b>0.968,D</b> | C/A |
| 904 | CACTIN    | p.S108L  | rs55862054  | <b>0.968,D</b> | G/A |
| 905 | ZNF764    | p.R52Q   | rs61744716  | <b>0.968,D</b> | C/T |
| 906 | MYH15     | p.H504Y  | rs9868484   | <b>0.968,D</b> | A/A |
| 907 | ZNF714    | p.K332R  | rs2884554   | <b>0.969,D</b> | G/G |
| 908 | CES1      | p.G18V   | rs3826190   | <b>0.969,D</b> | C/A |
| 909 | RBMX      | p.Y357H  | rs76876438  | <b>0.969,D</b> | A/G |
| 910 | RBMX      | p.R324P  | rs77794331  | <b>0.969,D</b> | C/G |
| 911 | IQGAP3    | p.V410L  | rs11264498  | <b>0.970,D</b> | G/G |
| 912 | HK3       | p.G246D  | rs61749653  | <b>0.970,D</b> | C/T |
| 913 | SLF2      | p.S541Y  | rs10883563  | <b>0.971,D</b> | A/A |
| 914 | BZRAP1    | p.A645G  | rs61739511  | <b>0.971,D</b> | G/C |
| 915 | HMCN1     | p.G1292V | N/A         | <b>0.972,D</b> | G/T |
| 916 | OR52W1    | p.L254Q  | rs11040799  | <b>0.972,D</b> | A/A |
| 917 | COL6A5    | p.T1280P | rs12488457  | <b>0.972,D</b> | A/C |
| 918 | ZNF676    | p.G27E   | rs8104929   | <b>0.972,D</b> | T/T |
| 919 | PKHD1L1   | p.Y440H  | rs964307    | <b>0.972,D</b> | T/C |
| 920 | HLA-A     | p.A270S  | rs1059632   | <b>0.973,D</b> | G/T |
| 921 | IPO4      | p.P580A  | rs11550452  | <b>0.973,D</b> | G/C |
| 922 | WDR46     | p.V341A  | rs14398     | <b>0.973,D</b> | A/G |
| 923 | CCT6B     | p.V48A   | rs2230552   | <b>0.973,D</b> | A/G |
| 924 | KRTAP10-1 | p.R241Q  | rs233317    | <b>0.973,D</b> | C/T |
| 925 | TYR       | p.S192Y  | rs1042602   | <b>0.974,D</b> | C/A |
| 926 | OR2D3     | p.L82I   | rs10839658  | <b>0.974,D</b> | C/A |
| 927 | NIPAL1    | p.I324V  | rs13116684  | <b>0.974,D</b> | A/G |
| 928 | C10orf71  | p.D45G   | rs151171891 | <b>0.974,D</b> | A/G |
| 929 | HLA-A     | p.S14L   | rs2230954   | <b>0.974,D</b> | C/T |
| 930 | R3HDM1    | p.Q632P  | rs2305165   | <b>0.974,D</b> | A/C |
| 931 | PRX       | p.P1083R | rs3745202   | <b>0.974,D</b> | G/C |
| 932 | KIAA0430  | p.Y223H  | rs775204838 | <b>0.974,D</b> | A/G |
| 933 | BAG3      | p.I94F   | rs145393807 | <b>0.975,D</b> | A/T |
| 934 | OR3A1     | p.R125Q  | rs703903    | <b>0.975,D</b> | C/T |

|     |          |          |              |                |     |
|-----|----------|----------|--------------|----------------|-----|
| 935 | C7orf57  | p.P201H  | rs2708890    | <b>0.976,D</b> | A/A |
| 936 | OR2T8    | p.A231G  | rs4595394    | <b>0.976,D</b> | G/G |
| 937 | OR10H5   | p.L216P  | rs62106066   | <b>0.976,D</b> | T/C |
| 938 | SCFD2    | p.L512S  | rs7675987    | <b>0.976,D</b> | A/G |
| 939 | KRT26    | p.W118R  | rs9898164    | <b>0.976,D</b> | A/G |
| 940 | C9orf43  | p.P271A  | rs111748634  | <b>0.977,D</b> | C/G |
| 941 | EPPK1    | p.R1066C | rs116925616  | <b>0.977,D</b> | G/A |
| 942 | EPPK1    | p.R1066H | rs118079568  | <b>0.977,D</b> | C/T |
| 943 | RFPL2    | p.R341C  | rs136468     | <b>0.977,D</b> | A/A |
| 944 | MAP1S    | p.S411C  | rs17710707   | <b>0.977,D</b> | C/G |
| 945 | KRT32    | p.S222Y  | rs2071561    | <b>0.977,D</b> | T/T |
| 946 | ACTN3    | p.E678A  | rs2229456    | <b>0.977,D</b> | A/C |
| 947 | IPPK     | p.L376F  | rs2277170    | <b>0.977,D</b> | G/A |
| 948 | TIMELESS | p.P1018L | rs2291739    | <b>0.977,D</b> | G/A |
| 949 | APOL4    | p.A316E  | rs6000173    | <b>0.977,D</b> | G/T |
| 950 | RGPD3    | p.D111N  | rs62152530   | <b>0.977,D</b> | C/T |
| 951 | MCTP1    | p.R612K  | rs9885412    | <b>0.977,D</b> | C/T |
| 952 | PKD1L1   | p.E645D  | N/A          | <b>0.978,D</b> | T/A |
| 953 | C17orf74 | p.S108A  | rs13290      | <b>0.978,D</b> | T/G |
| 954 | TAS2R42  | p.Y175F  | rs35969491   | <b>0.978,D</b> | T/A |
| 955 | FSCN3    | p.A24S   | rs3779536    | <b>0.978,D</b> | G/T |
| 956 | C1orf106 | p.Y347F  | rs41313912   | <b>0.978,D</b> | A/T |
| 957 | DOCK8    | p.P97T   | rs529208     | <b>0.978,D</b> | C/A |
| 958 | SCML4    | p.R337W  | rs56215636   | <b>0.978,D</b> | G/A |
| 959 | NUP107   | p.E394G  | rs899872828  | <b>0.978,D</b> | A/G |
| 960 | COL4A3   | p.G43R   | rs13424243   | <b>0.979,D</b> | G/C |
| 961 | SLC25A5  | p.R138H  | rs200550329  | <b>0.979,D</b> | G/A |
| 962 | OR1D5    | p.P210L  | rs2676567    | <b>0.979,D</b> | G/A |
| 963 | ZNF117   | p.K112N  | rs3807068    | <b>0.979,D</b> | T/G |
| 964 | FSCN2    | p.R406P  | rs750102960  | <b>0.979,D</b> | G/C |
| 965 | OR11I    | p.Y252S  | rs8105737    | <b>0.979,D</b> | C/C |
| 966 | HPSE2    | p.Y579F  | rs10883100   | <b>0.980,D</b> | T/A |
| 967 | KRT33B   | p.E85K   | rs12450621   | <b>0.980,D</b> | C/T |
| 968 | CYP4F2   | p.V433M  | rs2108622    | <b>0.980,D</b> | C/T |
| 969 | ADAMTS7  | p.T307M  | rs2127898    | <b>0.980,D</b> | G/A |
| 970 | VWDE     | p.C1050Y | rs35171886   | <b>0.980,D</b> | C/T |
| 971 | SERPINB8 | p.H359R  | rs3826616    | <b>0.980,D</b> | A/G |
| 972 | GATAD2A  | p.R293H  | rs748958687  | <b>0.980,D</b> | G/A |
| 973 | NCAPG2   | p.A132V  | N/A          | <b>0.981,D</b> | G/A |
| 974 | PSPH     | p.R65H   | rs200442078  | <b>0.981,D</b> | C/T |
| 975 | LYZL2    | p.K13R   | rs74551644   | <b>0.981,D</b> | T/C |
| 976 | IPPK     | p.R130W  | rs75957544   | <b>0.981,D</b> | G/A |
| 977 | TYSND1   | p.S239R  | rs1166621779 | <b>0.982,D</b> | T/G |
| 978 | COL6A2   | p.R680H  | rs1042917    | <b>0.982,D</b> | G/A |
| 979 | DLAT     | p.D451N  | rs10891314   | <b>0.982,D</b> | G/A |

|      |                  |          |              |                |     |
|------|------------------|----------|--------------|----------------|-----|
| 980  | BTC              | p.L124M  | rs11938093   | <b>0.982,D</b> | A/T |
| 981  | POM121L2         | p.G644C  | rs16897515   | <b>0.982,D</b> | C/A |
| 982  | FRG2C            | p.D9N    | rs201766868  | <b>0.982,D</b> | G/A |
| 983  | CTAGE9           | p.L398V  | rs202051647  | <b>0.982,D</b> | G/C |
| 984  | FUT2             | p.G258S  | rs602662     | <b>0.982,D</b> | A/A |
| 985  | PKP1             | p.R705W  | rs61818256   | <b>0.982,D</b> | C/T |
| 986  | FGGY             | p.T230M  | rs62623594   | <b>0.982,D</b> | C/T |
| 987  | MLX              | p.Q169R  | rs665268     | <b>0.982,D</b> | A/G |
| 988  | SCFD2            | p.G283V  | rs79025139   | <b>0.982,D</b> | C/A |
| 989  | MYOM1            | p.E704K  | rs149528866  | <b>0.983,D</b> | C/T |
| 990  | SLC25A5          | p.L173P  | rs200606066  | <b>0.983,D</b> | T/C |
| 991  | ECD              | p.D667G  | rs2271904    | <b>0.983,D</b> | T/C |
| 992  | SVOPL            | p.F385C  | rs2305816    | <b>0.983,D</b> | A/C |
| 993  | HMMR             | p.R92C   | rs299284     | <b>0.983,D</b> | C/T |
| 994  | ASPM             | p.L2647I | rs3762271    | <b>0.983,D</b> | G/T |
| 995  | SAT2             | p.R126C  | rs13894      | <b>0.984,D</b> | G/A |
| 996  | SLC25A5          | p.G73S   | rs143413528  | <b>0.984,D</b> | G/A |
| 997  | PLA2G3           | p.L157V  | rs2074735    | <b>0.984,D</b> | G/C |
| 998  | ATP10A           | p.W1172C | rs2076742    | <b>0.984,D</b> | C/G |
| 999  | RIOK2            | p.S96C   | rs2544773    | <b>0.984,D</b> | C/C |
| 1000 | WDR72            | p.P306L  | rs551225     | <b>0.984,D</b> | G/A |
| 1001 | OR10H5           | p.C204G  | rs61738869   | <b>0.984,D</b> | T/G |
| 1002 | SVOPL            | p.I362R  | rs773196860  | <b>0.984,D</b> | A/C |
| 1003 | KRT40            | p.T153M  | rs9908304    | <b>0.984,D</b> | A/A |
| 1004 | ATXN7            | p.K264R  | rs1053338    | <b>0.985,D</b> | A/G |
| 1005 | FLNB             | p.D1157N | rs1131356    | <b>0.985,D</b> | G/A |
| 1006 | ULK3             | p.K328R  | rs12898397   | <b>0.985,D</b> | C/C |
| 1007 | SLC35G5          | p.A43V   | rs13260331   | <b>0.985,D</b> | C/T |
| 1008 | RTP5             | p.G101E  | rs7420371    | <b>0.985,D</b> | A/A |
| 1009 | WASHC2A          | p.V1285M | rs1427726813 | <b>0.986,D</b> | G/A |
| 1010 | OR2W3            | p.E196D  | rs12139390   | <b>0.986,D</b> | C/C |
| 1011 | S100Z            | p.E23A   | rs1320308    | <b>0.986,D</b> | C/C |
| 1012 | KRT39            | p.L383M  | rs17843023   | <b>0.986,D</b> | G/T |
| 1013 | PDPR             | p.G564S  | rs369641860  | <b>0.986,D</b> | G/A |
| 1014 | SCARB1           | p.G2S    | rs4238001    | <b>0.986,D</b> | C/T |
| 1015 | EP400            | p.P2792S | rs542350095  | <b>0.986,D</b> | C/T |
| 1016 | TRPM3            | p.R1542Q | rs6560142    | <b>0.986,D</b> | C/T |
| 1017 | ST8SIA4          | p.S221N  | rs759794120  | <b>0.986,D</b> | C/T |
| 1018 | HOPX             | p.E110K  | rs76451666   | <b>0.986,D</b> | C/T |
| 1019 | LAMA5            | p.H1717Y | rs875379     | <b>0.986,D</b> | G/A |
| 1020 | OR5R1            | p.A274V  | rs998544     | <b>0.986,D</b> | G/A |
| 1021 | JBPF26, NOTCH2NL | p.T235S  | rs1387085969 | <b>0.987,D</b> | T/T |
| 1022 | C8B              | p.E46K   | rs12067507   | <b>0.987,D</b> | C/T |
| 1023 | OR56B4           | p.P277S  | rs1462983    | <b>0.987,D</b> | C/T |
| 1024 | SLC25A5          | p.N77T   | rs148294496  | <b>0.987,D</b> | A/C |

|      |             |          |             |                |     |
|------|-------------|----------|-------------|----------------|-----|
| 1025 | PDCD4       | p.M390K  | rs201057391 | <b>0.987,D</b> | T/A |
| 1026 | POLQ        | p.A2547V | rs2306211   | <b>0.987,D</b> | G/A |
| 1027 | OR14C36     | p.D231Y  | rs28545014  | <b>0.987,D</b> | G/T |
| 1028 | ANO4        | p.G115A  | rs34162417  | <b>0.987,D</b> | G/C |
| 1029 | PKD1L3      | p.V903I  | rs9921412   | <b>0.987,D</b> | T/T |
| 1030 | PRAMEF10    | p.K99I   | rs3121398   | <b>0.988,D</b> | T/A |
| 1031 | MB21D1      | p.P261H  | rs610913    | <b>0.988,D</b> | T/T |
| 1032 | VKORC1      | p.D36Y   | rs61742245  | <b>0.988,D</b> | C/A |
| 1033 | MPHOSPH8    | p.D460Y  | rs75390100  | <b>0.988,D</b> | G/T |
| 1034 | OR9G9,OR9G1 | p.V279E  | rs79251113  | <b>0.988,D</b> | T/A |
| 1035 | CNTNAP3     | p.G714V  | rs10974150  | <b>0.989,D</b> | A/A |
| 1036 | PJA1        | p.E418D  | rs11539157  | <b>0.989,D</b> | A/A |
| 1037 | TMC6        | p.L153F  | rs12449858  | <b>0.989,D</b> | G/A |
| 1038 | PMFBP1      | p.E48K   | rs35370634  | <b>0.989,D</b> | C/T |
| 1039 | TSPAN8      | p.G73A   | rs3763978   | <b>0.989,D</b> | C/G |
| 1040 | OR2G2       | p.L167P  | rs10925085  | <b>0.990,D</b> | T/C |
| 1041 | CLDN3       | p.P134L  | rs139191328 | <b>0.990,D</b> | G/A |
| 1042 | APBA2       | p.S55N   | rs142678624 | <b>0.990,D</b> | G/A |
| 1043 | CUBN        | p.N2157D | rs144360241 | <b>0.990,D</b> | T/C |
| 1044 | MTRR        | p.I49M   | rs1801394   | <b>0.990,D</b> | G/G |
| 1045 | IL17F       | p.E126G  | rs2397084   | <b>0.990,D</b> | T/C |
| 1046 | FNDC3B      | p.A452S  | rs35409041  | <b>0.990,D</b> | G/T |
| 1047 | OR52L1      | p.D88N   | rs4501959   | <b>0.990,D</b> | C/T |
| 1048 | ADGB        | p.E1621D | rs1052444   | <b>0.991,D</b> | A/T |
| 1049 | CROCC       | p.D463Y  | rs114323849 | <b>0.991,D</b> | G/T |
| 1050 | VWA5B1      | p.R880H  | rs11582960  | <b>0.991,D</b> | A/A |
| 1051 | PRDM7       | p.D90E   | rs12925933  | <b>0.991,D</b> | A/C |
| 1052 | FBXO39      | p.L231F  | rs1509123   | <b>0.991,D</b> | C/T |
| 1053 | HS6ST1      | p.D87E   | rs200979099 | <b>0.991,D</b> | G/T |
| 1054 | HLA-DRB1    | p.L28F   | rs201614260 | <b>0.991,D</b> | C/G |
| 1055 | OR51F2      | p.D84G   | rs35003053  | <b>0.991,D</b> | A/G |
| 1056 | LOXHD1      | p.G632C  | rs35088381  | <b>0.991,D</b> | C/A |
| 1057 | ZMIZ2       | p.L408F  | rs3735478   | <b>0.991,D</b> | G/T |
| 1058 | RRS1        | p.R191L  | rs3739336   | <b>0.991,D</b> | G/T |
| 1059 | PLEKHH1     | p.Q113L  | rs3825723   | <b>0.991,D</b> | A/T |
| 1060 | OR5H6       | p.C195R  | rs9853887   | <b>0.991,D</b> | C/C |
| 1061 | CCHCR1      | p.L179Q  | rs11540822  | <b>0.992,D</b> | A/T |
| 1062 | OR8D4       | p.L55R   | rs17127947  | <b>0.992,D</b> | T/G |
| 1063 | STON2       | p.S851A  | rs2241621   | <b>0.992,D</b> | C/C |
| 1064 | BCAS4       | p.E56D   | rs2272962   | <b>0.992,D</b> | G/T |
| 1065 | DOCK8       | p.D63N   | rs3209441   | <b>0.992,D</b> | G/A |
| 1066 | LRP2        | p.I4210L | rs4667591   | <b>0.992,D</b> | G/G |
| 1067 | FAM81B      | p.R134C  | rs76962324  | <b>0.992,D</b> | C/T |
| 1068 | ZNF703      | p.P307S  | rs79707182  | <b>0.992,D</b> | C/T |
| 1069 | MCPH1       | p.D314H  | rs930557    | <b>0.992,D</b> | C/C |



|      |          |          |             |                |     |
|------|----------|----------|-------------|----------------|-----|
| 1070 | MYH13    | p.R1438C | rs141961168 | <b>0.993,D</b> | G/A |
| 1071 | PLEKHG7  | p.D99G   | rs17790310  | <b>0.993,D</b> | A/G |
| 1072 | PEX6     | p.A721V  | rs35830695  | <b>0.993,D</b> | G/A |
| 1073 | FAM198A  | p.G539S  | rs3732858   | <b>0.993,D</b> | G/A |
| 1074 | UGT2A1   | p.L197S  | rs41292307  | <b>0.993,D</b> | A/G |
| 1075 | SYT8     | p.T303M  | rs484955    | <b>0.993,D</b> | T/T |
| 1076 | MUC6     | p.Y1826D | rs55903826  | <b>0.993,D</b> | A/C |
| 1077 | CYP4F8   | p.T152M  | rs61746468  | <b>0.993,D</b> | C/T |
| 1078 | PLEKHA6  | p.A128T  | rs61755454  | <b>0.993,D</b> | C/T |
| 1079 | C6orf222 | p.L582V  | rs743852    | <b>0.993,D</b> | G/C |
| 1080 | FBLN5    | p.V361I  | rs757825263 | <b>0.993,D</b> | C/T |
| 1081 | HLA-DRB1 | p.A169T  | rs78916069  | <b>0.993,D</b> | C/T |
| 1082 | OR10A2   | p.K258T  | rs7926083   | <b>0.993,D</b> | A/C |
| 1083 | VRK2     | p.I167V  | rs1051061   | <b>0.994,D</b> | A/G |
| 1084 | SPATA6   | p.C478Y  | rs1056042   | <b>0.994,D</b> | C/T |
| 1085 | ARSB     | p.V358M  | rs1065757   | <b>0.994,D</b> | T/T |
| 1086 | TRIM66   | p.H324R  | rs11042023  | <b>0.994,D</b> | C/C |
| 1087 | TYR      | p.R402Q  | rs1126809   | <b>0.994,D</b> | G/A |
| 1088 | SAA1     | p.V75A   | rs1136747   | <b>0.994,D</b> | T/C |
| 1089 | FAM179A  | p.Q265R  | rs12623297  | <b>0.994,D</b> | A/G |
| 1090 | ZBBX     | p.A473G  | rs13096767  | <b>0.994,D</b> | G/C |
| 1091 | MRI1     | p.T209R  | rs141252695 | <b>0.994,D</b> | C/G |
| 1092 | EEF2K    | p.P75A   | rs17841292  | <b>0.994,D</b> | C/G |
| 1093 | DMD      | p.R1622H | rs1801187   | <b>0.994,D</b> | T/T |
| 1094 | SPATA19  | p.A50V   | rs2282602   | <b>0.994,D</b> | G/A |
| 1095 | PKD1L1   | p.V312F  | rs2686817   | <b>0.994,D</b> | A/A |
| 1096 | MUC6     | p.P1873Q | rs34844844  | <b>0.994,D</b> | G/T |
| 1097 | OR5I1    | p.L50S   | rs4367963   | <b>0.994,D</b> | A/G |
| 1098 | OR9G4    | p.V222A  | rs513873    | <b>0.994,D</b> | A/G |
| 1099 | MAP2K3   | p.R67W   | rs56216806  | <b>0.994,D</b> | C/T |
| 1100 | ABCB5    | p.G810V  | rs62453384  | <b>0.994,D</b> | G/T |
| 1101 | RUNX3    | p.I18N   | rs6672420   | <b>0.994,D</b> | A/T |
| 1102 | FER1L5   | p.R1523Q | rs745681758 | <b>0.994,D</b> | G/A |
| 1103 | FRMD4B   | p.S947L  | rs9831516   | <b>0.994,D</b> | A/A |
| 1104 | KIAA0753 | p.E375D  | rs9889363   | <b>0.994,D</b> | A/A |
| 1105 | NEB      | p.W3603C | rs10172023  | <b>0.995,D</b> | C/G |
| 1106 | HLA-B    | p.E70A   | rs1050538   | <b>0.995,D</b> | T/G |
| 1107 | GUCA1C   | p.G148D  | rs10933973  | <b>0.995,D</b> | C/A |
| 1108 | EVC      | p.R576Q  | rs1383180   | <b>0.995,D</b> | G/A |
| 1109 | TMF1     | p.D798H  | rs1532918   | <b>0.995,D</b> | C/G |
| 1110 | SPTB     | p.G1408R | rs17245552  | <b>0.995,D</b> | C/G |
| 1111 | STEAP2   | p.F17C   | rs194520    | <b>0.995,D</b> | T/G |
| 1112 | MUC6     | p.L1836H | rs200241162 | <b>0.995,D</b> | A/T |
| 1113 | TAS2R19  | p.A227P  | rs200715232 | <b>0.995,D</b> | C/G |
| 1114 | AHNAK2   | p.K2170R | rs201127689 | <b>0.995,D</b> | C/C |

|      |           |           |             |                |     |
|------|-----------|-----------|-------------|----------------|-----|
| 1115 | ABCA9     | p.K1306T  | rs2302294   | <b>0.995,D</b> | G/G |
| 1116 | GSDMB     | p.G304R   | rs2305479   | <b>0.995,D</b> | C/T |
| 1117 | KRTAP10-1 | p.P39L    | rs233320    | <b>0.995,D</b> | G/A |
| 1118 | PLET1     | p.S142P   | rs2564872   | <b>0.995,D</b> | A/G |
| 1119 | INMT      | p.F254C   | rs4720015   | <b>0.995,D</b> | G/G |
| 1120 | ADGRV1    | p.P1987L  | rs4916685   | <b>0.995,D</b> | T/T |
| 1121 | DCK       | p.P122S   | rs67437265  | <b>0.995,D</b> | C/T |
| 1122 | MS4A15    | p.L47R    | rs1032939   | <b>0.996,D</b> | T/G |
| 1123 | PKD1L3    | p.S1176R  | rs1035543   | <b>0.996,D</b> | C/C |
| 1124 | ZNF683    | p.D48G    | rs10794532  | <b>0.996,D</b> | C/C |
| 1125 | PDHX      | p.T101A   | rs11539202  | <b>0.996,D</b> | A/G |
| 1126 | RELN      | p.S630R   | rs115734214 | <b>0.996,D</b> | T/G |
| 1127 | CD300C    | p.T71I    | rs11870245  | <b>0.996,D</b> | G/A |
| 1128 | CLEC12B   | p.T6N     | rs1359082   | <b>0.996,D</b> | C/A |
| 1129 | CATSPERD  | p.E596D   | rs143660393 | <b>0.996,D</b> | G/C |
| 1130 | SVEP1     | p.E3412Q  | rs145193955 | <b>0.996,D</b> | C/G |
| 1131 | HPSE2     | p.Y211H   | rs147866530 | <b>0.996,D</b> | A/G |
| 1132 | HLA-DRB1  | p.P25R    | rs148093782 | <b>0.996,D</b> | G/C |
| 1133 | RNF40     | p.L261F   | rs150097902 | <b>0.996,D</b> | C/T |
| 1134 | PMFBP1    | p.K768N   | rs16973716  | <b>0.996,D</b> | T/G |
| 1135 | TCP10L2   | p.G254R   | rs200019718 | <b>0.996,D</b> | G/A |
| 1136 | MUC4      | p.A4101S  | rs2246901   | <b>0.996,D</b> | A/A |
| 1137 | C1orf131  | p.L28V    | rs2274067   | <b>0.996,D</b> | G/C |
| 1138 | CHD1L     | p.S671C   | rs2275249   | <b>0.996,D</b> | C/G |
| 1139 | TTN       | p.R19479H | rs2288569   | <b>0.996,D</b> | C/T |
| 1140 | ITSN2     | p.A1520T  | rs2303291   | <b>0.996,D</b> | C/T |
| 1141 | GP6       | p.P314A   | rs2304166   | <b>0.996,D</b> | C/C |
| 1142 | SNTG2     | p.S168Y   | rs28505970  | <b>0.996,D</b> | C/A |
| 1143 | ZAN       | p.N2073S  | rs314300    | <b>0.996,D</b> | A/G |
| 1144 | POLI      | p.F532S   | rs3218786   | <b>0.996,D</b> | T/C |
| 1145 | SHROOM3   | p.P469A   | rs344141    | <b>0.996,D</b> | G/G |
| 1146 | MUC6      | p.T1854M  | rs34507884  | <b>0.996,D</b> | G/A |
| 1147 | OR51G1    | p.R124H   | rs34742470  | <b>0.996,D</b> | C/T |
| 1148 | TTC21A    | p.R622W   | rs35581078  | <b>0.996,D</b> | C/T |
| 1149 | GPR45     | p.L312F   | rs35946826  | <b>0.996,D</b> | C/T |
| 1150 | APLF      | p.Q433K   | rs36021078  | <b>0.996,D</b> | C/A |
| 1151 | A2ML1     | p.I1054T  | rs371117844 | <b>0.996,D</b> | T/C |
| 1152 | SYNPO2L   | p.P707L   | rs3812629   | <b>0.996,D</b> | G/A |
| 1153 | TTN       | p.R34594H | rs3829747   | <b>0.996,D</b> | C/T |
| 1154 | OR1N2     | p.F194L   | rs41297203  | <b>0.996,D</b> | T/C |
| 1155 | SLCO1B1   | p.V174A   | rs4149056   | <b>0.996,D</b> | T/C |
| 1156 | FRMD7     | p.S281L   | rs5977625   | <b>0.996,D</b> | A/A |
| 1157 | INCENP    | p.E644D   | rs7129085   | <b>0.996,D</b> | G/T |
| 1158 | RBMX      | p.G379R   | rs72615484  | <b>0.996,D</b> | C/G |
| 1159 | KCNMB3    | p.A31T    | rs7645550   | <b>0.996,D</b> | C/T |



|      |               |          |             |                |     |
|------|---------------|----------|-------------|----------------|-----|
| 1160 | UNC45A        | p.T781M  | rs8041035   | <b>0.996,D</b> | C/T |
| 1161 | OGG1          | p.N151I  | rs764308935 | <b>0.997,D</b> | A/T |
| 1162 | USP19         | p.V956A  | N/A         | <b>0.997,D</b> | A/G |
| 1163 | MICA          | p.L48V   | rs1051790   | <b>0.997,D</b> | C/G |
| 1164 | BCAS1         | p.S583P  | rs1055246   | <b>0.997,D</b> | A/G |
| 1165 | UNC45B        | p.I850N  | rs11654824  | <b>0.997,D</b> | T/A |
| 1166 | HLA-DRB5      | p.D31G   | rs139583918 | <b>0.997,D</b> | T/C |
| 1167 | OR2AG2        | p.G233R  | rs143018775 | <b>0.997,D</b> | C/T |
| 1168 | FAM65B        | p.W15R   | rs148823241 | <b>0.997,D</b> | A/G |
| 1169 | PCDHB7        | p.V689L  | rs1811237   | <b>0.997,D</b> | G/T |
| 1170 | SLC25A5       | p.G183V  | rs200974395 | <b>0.997,D</b> | G/T |
| 1171 | AKR7L         | p.C186Y  | rs2235794   | <b>0.997,D</b> | T/T |
| 1172 | CHIA          | p.F354S  | rs2275254   | <b>0.997,D</b> | T/C |
| 1173 | TRERF1        | p.C834S  | rs2295275   | <b>0.997,D</b> | A/T |
| 1174 | DPYD          | p.M166V  | rs2297595   | <b>0.997,D</b> | T/C |
| 1175 | ADGRV1        | p.N2345S | rs2366926   | <b>0.997,D</b> | G/G |
| 1176 | ADAMTS13      | p.P618A  | rs28647808  | <b>0.997,D</b> | C/G |
| 1177 | SLC7A13       | p.V249M  | rs2976189   | <b>0.997,D</b> | T/T |
| 1178 | DNAH10        | p.T1986M | rs33935373  | <b>0.997,D</b> | C/T |
| 1179 | NPHS1         | p.R408Q  | rs33950747  | <b>0.997,D</b> | C/T |
| 1180 | THEG          | p.R193C  | rs35119230  | <b>0.997,D</b> | A/A |
| 1181 | AHSG          | p.R317C  | rs35457250  | <b>0.997,D</b> | C/T |
| 1182 | ZCCHC14       | p.V693M  | rs3748400   | <b>0.997,D</b> | C/T |
| 1183 | LGALS3        | p.P64H   | rs4644      | <b>0.997,D</b> | C/A |
| 1184 | AGT           | p.T207M  | rs4762      | <b>0.997,D</b> | G/A |
| 1185 | MATN3         | p.E252K  | rs52826764  | <b>0.997,D</b> | C/T |
| 1186 | OBSCN         | p.G4209R | rs56218706  | <b>0.997,D</b> | G/A |
| 1187 | OBSL1         | p.R1767Q | rs59332477  | <b>0.997,D</b> | T/T |
| 1188 | SVEP1         | p.R229G  | rs61751937  | <b>0.997,D</b> | G/C |
| 1189 | GALNTL5       | p.C124R  | rs6960270   | <b>0.997,D</b> | C/C |
| 1190 | FAM131C       | p.R107Q  | rs71510977  | <b>0.997,D</b> | C/T |
| 1191 | HLA-DRB5      | p.L28F   | rs72508462  | <b>0.997,D</b> | C/G |
| 1192 | MUC6          | p.T1889I | rs747429892 | <b>0.997,D</b> | G/A |
| 1193 | HLA-C         | p.R155S  | rs76907552  | <b>0.997,D</b> | G/T |
| 1194 | HSPG2         | p.A1503V | rs897471    | <b>0.997,D</b> | A/A |
| 1195 | GEMIN4        | p.A579G  | rs910925    | <b>0.997,D</b> | G/C |
| 1196 | ANXA11        | p.R230C  | rs1049550   | <b>0.998,D</b> | G/A |
| 1197 | SPAG17        | p.P1348L | rs10923472  | <b>0.998,D</b> | G/A |
| 1198 | TNXB          | p.R2704H | rs10947230  | <b>0.998,D</b> | C/T |
| 1199 | OR51I2        | p.R263H  | rs11037502  | <b>0.998,D</b> | G/A |
| 1200 | SPATA3        | p.C122S  | rs12105962  | <b>0.998,D</b> | G/C |
| 1201 | CCHCR1        | p.R627Q  | rs130072    | <b>0.998,D</b> | C/T |
| 1202 | NEB           | p.K2613N | rs13013209  | <b>0.998,D</b> | C/G |
| 1203 | TAS2R31       | p.D45H   | rs143614038 | <b>0.998,D</b> | C/G |
| 1204 | UGT2A2,UGT2A1 | p.S488Y  | rs144056072 | <b>0.998,D</b> | G/T |

|      |          |          |              |                |     |
|------|----------|----------|--------------|----------------|-----|
| 1205 | DOPEY2   | p.R2055C | rs145488940  | <b>0.998,D</b> | C/T |
| 1206 | PSG2     | p.G118R  | rs149579909  | <b>0.998,D</b> | C/G |
| 1207 | VWDE     | p.C890F  | rs17165906   | <b>0.998,D</b> | C/A |
| 1208 | SPAG17   | p.E158V  | rs17185492   | <b>0.998,D</b> | T/A |
| 1209 | NBPF3    | p.Y58C   | rs1827293    | <b>0.998,D</b> | G/G |
| 1210 | KRT78    | p.L92P   | rs2013335    | <b>0.998,D</b> | A/G |
| 1211 | C5orf46  | p.S4L    | rs2250145    | <b>0.998,D</b> | A/A |
| 1212 | COLEC12  | p.G606S  | rs2305027    | <b>0.998,D</b> | C/T |
| 1213 | HYDIN    | p.E2306G | rs2502726    | <b>0.998,D</b> | T/C |
| 1214 | KMT2C    | p.C988F  | rs28522267   | <b>0.998,D</b> | C/A |
| 1215 | TRPM5    | p.V335L  | rs34350821   | <b>0.998,D</b> | C/A |
| 1216 | ELSPBP1  | p.P185L  | rs35700000   | <b>0.998,D</b> | C/T |
| 1217 | IGF2R    | p.R292Q  | rs370150079  | <b>0.998,D</b> | G/A |
| 1218 | ANLN     | p.S65W   | rs3735400    | <b>0.998,D</b> | C/G |
| 1219 | NEK11    | p.E530V  | rs3738000    | <b>0.998,D</b> | A/T |
| 1220 | IRAK2    | p.L392V  | rs3844283    | <b>0.998,D</b> | C/G |
| 1221 | DNHD1    | p.L846M  | rs4282961    | <b>0.998,D</b> | C/A |
| 1222 | NWD2     | p.L569M  | rs4634233    | <b>0.998,D</b> | A/A |
| 1223 | OR8B2    | p.S273F  | rs503220     | <b>0.998,D</b> | A/A |
| 1224 | OBP2A    | p.G130A  | rs55695858   | <b>0.998,D</b> | G/C |
| 1225 | ABCB5    | p.D370G  | rs61732039   | <b>0.998,D</b> | A/G |
| 1226 | CRAMP1   | p.P1084S | rs61746451   | <b>0.998,D</b> | C/T |
| 1227 | APOB     | p.A618V  | rs679899     | <b>0.998,D</b> | G/A |
| 1228 | FADS6    | p.V256I  | rs7219093    | <b>0.998,D</b> | C/T |
| 1229 | AFAP1L2  | p.L384F  | rs73365341   | <b>0.998,D</b> | G/A |
| 1230 | OR51I2   | p.R263C  | rs75620804   | <b>0.998,D</b> | C/T |
| 1231 | TAS2R19  | p.L235R  | rs763119571  | <b>0.998,D</b> | A/C |
| 1232 | AHNAK2   | p.R51W   | rs76650680   | <b>0.998,D</b> | G/A |
| 1233 | OR10X1   | p.T90M   | rs77690058   | <b>0.998,D</b> | G/A |
| 1234 | BMS1     | p.R939G  | rs779750824  | <b>0.998,D</b> | C/G |
| 1235 | OR8B2    | p.L164F  | rs886202     | <b>0.998,D</b> | A/A |
| 1236 | PKD1L3   | p.V593M  | rs9925415    | <b>0.998,D</b> | C/T |
| 1237 | ESPNL    | p.L866Q  | rs1225875400 | <b>0.999,D</b> | T/A |
| 1238 | ITGB1    | p.I782F  | N/A          | <b>0.999,D</b> | T/A |
| 1239 | TMEM176A | p.L187F  | rs10378      | <b>0.999,D</b> | G/T |
| 1240 | NUDT6    | p.R40Q   | rs1048201    | <b>0.999,D</b> | C/T |
| 1241 | OR4X1    | p.P282S  | rs10838852   | <b>0.999,D</b> | T/T |
| 1242 | SPATS1   | p.G8R    | rs10948132   | <b>0.999,D</b> | G/A |
| 1243 | ZAN      | p.G1674C | rs10953303   | <b>0.999,D</b> | G/T |
| 1244 | RBMXL1   | p.G71A   | rs111779380  | <b>0.999,D</b> | C/G |
| 1245 | IL23R    | p.R381Q  | rs11209026   | <b>0.999,D</b> | G/A |
| 1246 | OR51V1   | p.G96W   | rs11512276   | <b>0.999,D</b> | C/G |
| 1247 | AVPI1    | p.L36R   | rs11556392   | <b>0.999,D</b> | A/C |
| 1248 | CDC25C   | p.G297R  | rs11567997   | <b>0.999,D</b> | C/G |
| 1249 | SLCO1A2  | p.E172D  | rs11568563   | <b>0.999,D</b> | T/G |

|      |                 |           |             |                |     |
|------|-----------------|-----------|-------------|----------------|-----|
| 1250 | SLC22A10        | p.P516L   | rs1201559   | <b>0.999,D</b> | T/T |
| 1251 | SPINK6          | p.P36T    | rs12186491  | <b>0.999,D</b> | A/A |
| 1252 | LARP1B          | p.P462R   | rs12508837  | <b>0.999,D</b> | C/G |
| 1253 | EPPK1           | p.Y744C   | rs12543389  | <b>0.999,D</b> | T/C |
| 1254 | OR2G2           | p.P24A    | rs12737801  | <b>0.999,D</b> | C/G |
| 1255 | FSIP1           | p.L411F   | rs12908846  | <b>0.999,D</b> | G/A |
| 1256 | ZNF404          | p.H230Y   | rs12977303  | <b>0.999,D</b> | G/A |
| 1257 | ESYT2           | p.C182S   | rs13233513  | <b>0.999,D</b> | A/T |
| 1258 | KIR3DS1,KIR3DL1 | p.S107L   | rs143159382 | <b>0.999,D</b> | C/T |
| 1259 | SERPINB11       | p.W188R   | rs1506419   | <b>0.999,D</b> | T/A |
| 1260 | KRTAP3-2        | p.P53L    | rs150830376 | <b>0.999,D</b> | G/A |
| 1261 | A2ML1           | p.C970Y   | rs1558526   | <b>0.999,D</b> | G/A |
| 1262 | GPR151          | p.P40L    | rs17104742  | <b>0.999,D</b> | G/A |
| 1263 | STPG2           | p.Y125H   | rs17558193  | <b>0.999,D</b> | A/G |
| 1264 | PRR16           | p.P40T    | rs17853861  | <b>0.999,D</b> | C/A |
| 1265 | MBL2            | p.G54D    | rs1800450   | <b>0.999,D</b> | T/T |
| 1266 | NQO1            | p.P187S   | rs1800566   | <b>0.999,D</b> | G/A |
| 1267 | ETFA            | p.T171I   | rs1801591   | <b>0.999,D</b> | G/A |
| 1268 | HPS4            | p.H624Y   | rs1894706   | <b>0.999,D</b> | A/A |
| 1269 | SLC22A24        | p.T58S    | rs1939748   | <b>0.999,D</b> | C/C |
| 1270 | MUC6            | p.P1841T  | rs199539548 | <b>0.999,D</b> | G/T |
| 1271 | SNED1           | p.S270Y   | rs201554730 | <b>0.999,D</b> | C/A |
| 1272 | TG              | p.G653D   | rs2069548   | <b>0.999,D</b> | G/A |
| 1273 | OR1A2           | p.G256C   | rs2241091   | <b>0.999,D</b> | G/T |
| 1274 | PARP4           | p.A899T   | rs2275660   | <b>0.999,D</b> | C/T |
| 1275 | THSD7A          | p.D771E   | rs2285744   | <b>0.999,D</b> | G/C |
| 1276 | CHIT1           | p.G102S   | rs2297950   | <b>0.999,D</b> | C/T |
| 1277 | ACACB           | p.A651T   | rs2300455   | <b>0.999,D</b> | G/A |
| 1278 | SLC22A14        | p.P560R   | rs240033    | <b>0.999,D</b> | C/G |
| 1279 | ADAMTS5         | p.R614H   | rs2830585   | <b>0.999,D</b> | C/T |
| 1280 | STKLD1          | p.G535C   | rs33919837  | <b>0.999,D</b> | G/T |
| 1281 | FBN3            | p.G1614S  | rs33967815  | <b>0.999,D</b> | C/T |
| 1282 | TRAF3IP2        | p.D19N    | rs33980500  | <b>0.999,D</b> | C/T |
| 1283 | PPP1R26         | p.R381L   | rs34151777  | <b>0.999,D</b> | G/T |
| 1284 | GTPBP10         | p.L164F   | rs35001814  | <b>0.999,D</b> | G/C |
| 1285 | OR51G1          | p.E113K   | rs35264256  | <b>0.999,D</b> | C/T |
| 1286 | PVRL4           | p.P104T   | rs35434391  | <b>0.999,D</b> | G/T |
| 1287 | TTN             | p.R32538H | rs3731749   | <b>0.999,D</b> | C/T |
| 1288 | HEATR5A         | p.V886M   | rs3736918   | <b>0.999,D</b> | T/T |
| 1289 | ZNF45           | p.P303R   | rs388685    | <b>0.999,D</b> | G/C |
| 1290 | HIVEP3          | p.P407T   | rs41269477  | <b>0.999,D</b> | G/T |
| 1291 | INPP5B          | p.D871H   | rs41311191  | <b>0.999,D</b> | C/G |
| 1292 | MYH15           | p.R454Q   | rs4299484   | <b>0.999,D</b> | C/T |
| 1293 | CYBA            | p.Y72H    | rs4673      | <b>0.999,D</b> | A/G |
| 1294 | KRTAP10-11      | p.S130F   | rs4818952   | <b>0.999,D</b> | C/T |

|      |             |           |              |                |     |
|------|-------------|-----------|--------------|----------------|-----|
| 1295 | OR1L6       | p.C150Y   | rs4838012    | <b>0.999,D</b> | G/A |
| 1296 | RCBTB1      | p.A24V    | rs4942848    | <b>0.999,D</b> | G/A |
| 1297 | OR9G9,OR9G1 | p.Y112C   | rs4990194    | <b>0.999,D</b> | A/G |
| 1298 | OR51B5      | p.R88G    | rs57900141   | <b>0.999,D</b> | T/C |
| 1299 | SLC9B1      | p.A473V   | rs58374767   | <b>0.999,D</b> | G/A |
| 1300 | OR51L1      | p.N241Y   | rs61729748   | <b>0.999,D</b> | A/T |
| 1301 | NME8        | p.I338T   | rs62001870   | <b>0.999,D</b> | T/C |
| 1302 | TSEN54      | p.P483A   | rs62088470   | <b>0.999,D</b> | C/G |
| 1303 | CEP120      | p.L602V   | rs6595440    | <b>0.999,D</b> | G/C |
| 1304 | DISC1       | p.L639F   | rs6675281    | <b>0.999,D</b> | C/T |
| 1305 | FAM171A2    | p.P129L   | rs71371993   | <b>0.999,D</b> | G/A |
| 1306 | CAPN8       | p.A136V   | rs71644745   | <b>0.999,D</b> | G/A |
| 1307 | OR56B1      | p.C106R   | rs7397032    | <b>0.999,D</b> | C/C |
| 1308 | CCDC66      | p.R460Q   | rs7637449    | <b>0.999,D</b> | G/A |
| 1309 | DLGAP2      | p.T375M   | rs767514905  | <b>0.999,D</b> | C/T |
| 1310 | USP45       | p.K67E    | rs7744845    | <b>0.999,D</b> | T/C |
| 1311 | TTN         | p.Y15591H | rs775496863  | <b>0.999,D</b> | A/G |
| 1312 | ANKLE1      | p.R548Q   | rs77683348   | <b>0.999,D</b> | G/A |
| 1313 | SUSD2       | p.G70V    | rs79232038   | <b>0.999,D</b> | G/T |
| 1314 | RTN3        | p.D501H   | rs7936660    | <b>0.999,D</b> | G/C |
| 1315 | OR5AN1      | p.L289F   | rs7941190    | <b>0.999,D</b> | C/C |
| 1316 | ASPSCR1     | p.L252Q   | rs8074498    | <b>0.999,D</b> | A/A |
| 1317 | SYNGR4      | p.R27W    | rs919804     | <b>0.999,D</b> | C/T |
| 1318 | COL12A1     | p.G3058S  | rs970547     | <b>0.999,D</b> | T/T |
| 1319 | LEXM        | p.G126C   | rs9782980    | <b>0.999,D</b> | G/T |
| 1320 | UBASH3B     | p.Y546C   | rs1428664827 | <b>1.000,D</b> | A/G |
| 1321 | IDO2        | p.R248W   | rs10109853   | <b>1.000,D</b> | T/T |
| 1322 | OR6B2       | p.C179R   | rs10187574   | <b>1.000,D</b> | A/G |
| 1323 | RAD17       | p.L546R   | rs1045051    | <b>1.000,D</b> | T/G |
| 1324 | PIGC        | p.P266S   | rs1063412    | <b>1.000,D</b> | A/A |
| 1325 | NXPE1       | p.G211R   | rs10891692   | <b>1.000,D</b> | C/T |
| 1326 | SPATA31A6   | p.P420L   | rs11261835   | <b>1.000,D</b> | T/T |
| 1327 | IGSF10      | p.D2614N  | rs112889898  | <b>1.000,D</b> | C/T |
| 1328 | GAK         | p.D1297N  | rs1134921    | <b>1.000,D</b> | C/T |
| 1329 | CFAP69      | p.T867M   | rs1134956    | <b>1.000,D</b> | C/T |
| 1330 | HLA-A       | p.G131W   | rs1136702    | <b>1.000,D</b> | G/T |
| 1331 | TBC1D26     | p.A206V   | rs11650318   | <b>1.000,D</b> | T/T |
| 1332 | PXDNL       | p.R781G   | rs11992240   | <b>1.000,D</b> | G/C |
| 1333 | INADL       | p.G1543V  | rs12140153   | <b>1.000,D</b> | G/T |
| 1334 | NFXL1       | p.P246L   | rs12651301   | <b>1.000,D</b> | G/A |
| 1335 | ERICH3      | p.G319R   | rs140864337  | <b>1.000,D</b> | C/G |
| 1336 | ATP2C2      | p.G809W   | rs141229929  | <b>1.000,D</b> | G/T |
| 1337 | SCN11A      | p.L1158P  | rs141686175  | <b>1.000,D</b> | A/G |
| 1338 | SCML4       | p.G158D   | rs142985964  | <b>1.000,D</b> | C/T |
| 1339 | PDHA2       | p.R286P   | rs147966234  | <b>1.000,D</b> | G/C |

|                   |          |          |             |         |     |
|-------------------|----------|----------|-------------|---------|-----|
| 1340              | FAT4     | p.G3524D | rs1567047   | 1.000,D | A/A |
| 1341              | FANK1    | p.P12L   | rs17153879  | 1.000,D | C/T |
| 1342              | QSOX1    | p.G200A  | rs17855475  | 1.000,D | G/C |
| 1343              | CFTR     | p.R668C  | rs1800100   | 1.000,D | C/T |
| 1344              | LOXL4    | p.D405A  | rs1983864   | 1.000,D | T/G |
| 1345              | MUSK     | p.A763T  | rs199507468 | 1.000,D | G/A |
| 1346              | PCDHGA11 | p.G469C  | rs199543811 | 1.000,D | G/T |
| 1347              | FER1L6   | p.G943W  | rs200894396 | 1.000,D | G/T |
| 1348              | RHBG     | p.G46D   | rs2245623   | 1.000,D | A/A |
| 1349              | CYP4B1   | p.R376C  | rs2297809   | 1.000,D | C/T |
| 1350              | SMPDL3A  | p.P161S  | rs28385609  | 1.000,D | C/T |
| 1351              | NDUFA9   | p.P294L  | rs34076756  | 1.000,D | C/T |
| 1352              | GMPR2    | p.G206D  | rs34354104  | 1.000,D | G/A |
| 1353              | LOXHD1   | p.G626C  | rs34589386  | 1.000,D | C/A |
| 1354              | PRSS48   | p.C53Y   | rs36097019  | 1.000,D | A/A |
| 1355              | PCDHA1   | p.N449H  | rs3733712   | 1.000,D | A/C |
| 1356              | TLR3     | p.L412F  | rs3775291   | 1.000,D | C/T |
| 1357              | BCL2A1   | p.G82D   | rs3826007   | 1.000,D | C/T |
| 1358              | CYP2A7   | p.R311C  | rs3869579   | 1.000,D | A/A |
| 1359              | ACTL7A   | p.G214S  | rs41278347  | 1.000,D | G/A |
| 1360              | OR1D2    | p.T240I  | rs4300683   | 1.000,D | G/A |
| 1361              | ZNF221   | p.C256R  | rs439676    | 1.000,D | C/C |
| 1362              | ZNF493   | p.C323F  | rs4621113   | 1.000,D | G/T |
| 1363              | PKD1L2   | p.G1163W | rs4889244   | 1.000,D | T/T |
| 1364              | OR2L8    | p.Y217C  | rs4925583   | 1.000,D | G/G |
| 1365              | SLC22A24 | p.R172G  | rs4963245   | 1.000,D | G/C |
| 1366              | OR5AU1   | p.L117F  | rs4982419   | 1.000,D | A/A |
| 1367              | OR1D5    | p.L250F  | rs55677131  | 1.000,D | G/A |
| 1368              | OR51A2   | p.S218F  | rs55889636  | 1.000,D | A/A |
| 1369              | SPINT4   | p.G73S   | rs6017667   | 1.000,D | G/A |
| 1370              | MRC1     | p.G396S  | rs606231248 | 1.000,D | G/A |
| 1371              | GLT6D1   | p.A216T  | rs61739510  | 1.000,D | C/T |
| 1372              | TPSD1    | p.L70F   | rs61739908  | 1.000,D | C/T |
| 1373              | ARRDC4   | p.T235M  | rs61747226  | 1.000,D | C/T |
| 1374              | OR5A1    | p.D183N  | rs6591536   | 1.000,D | A/A |
| 1375              | POU5F1B  | p.E238Q  | rs7002225   | 1.000,D | G/C |
| 1376              | KCNJ12   | p.D173N  | rs73313922  | 1.000,D | G/A |
| 1377              | CCDC157  | p.D51N   | rs740223    | 1.000,D | G/A |
| 1378              | KCNJ12   | p.G145S  | rs75029097  | 1.000,D | G/A |
| 1379              | KCNJ12   | p.E139K  | rs76265595  | 1.000,D | G/A |
| 1380              | GOLGA3   | p.G608C  | rs768043775 | 1.000,D | C/A |
| 1381              | EPHA10   | p.G187R  | rs912259721 | 1.000,D | C/G |
| <b>opGain SNP</b> |          |          |             |         |     |
| 1382              | AADACL3  | p.C13X   | rs3000860   | N/A     | C/A |
| 1383              | TTC22    | p.R342X  | rs2270002   | N/A     | G/A |

|      |              |          |              |     |     |
|------|--------------|----------|--------------|-----|-----|
| 1384 | NBPF8        | p.Y905X  | rs878920914  | N/A | C/G |
| 1385 | FCGR2A       | p.Q62X   | rs9427397    | N/A | C/T |
| 1386 | FMO2         | p.Q472X  | rs6661174    | N/A | T/T |
| 1387 | TLR5         | p.R392X  | rs5744168    | N/A | G/A |
| 1388 | OR2L8        | p.Y289X  | rs10888281   | N/A | A/A |
| 1389 | ANKRD36C     | p.R417X  | rs76474100   | N/A | G/A |
| 1390 | DBI          | p.Y28X   | rs3731608    | N/A | C/G |
| 1391 | TEX51        | p.R72X   | rs61730220   | N/A | C/T |
| 1392 | LOC100130451 | p.S82X   | rs13000409   | N/A | C/C |
| 1393 | C2orf83      | p.W141X  | rs2176186    | N/A | C/T |
| 1394 | TTLL3        | p.R704X  | rs115917139  | N/A | C/T |
| 1395 | LOC100132146 | p.R46X   | rs148870990  | N/A | C/T |
| 1396 | CPN2         | p.Q509X  | rs4974539    | N/A | G/A |
| 1397 | ADH4         | p.Y22X   | rs3919370    | N/A | A/T |
| 1398 | SLC6A18      | p.Y319X  | rs7447815    | N/A | C/G |
| 1399 | ADAMTS12     | p.L230X  | rs1530507    | N/A | T/T |
| 1400 | ANKDD1B      | p.W480X  | rs34358      | N/A | G/A |
| 1401 | FAM81B       | p.Q144X  | rs35391433   | N/A | C/T |
| 1402 | DCANP1       | p.R117X  | rs12520799   | N/A | T/A |
| 1403 | SRA1         | p.S93X   | rs250426     | N/A | G/T |
| 1404 | OR2J1        | p.Q194X  | rs2394517    | N/A | C/T |
| 1405 | CCHCR1       | p.E41X   | rs72856718   | N/A | C/A |
| 1406 | HLA-DRB1     | p.W38X   | rs9269958    | N/A | C/T |
| 1407 | HLA-DPB1     | p.G40X   | rs1126511    | N/A | G/T |
| 1408 | TAAR9        | p.K61X   | rs2842899    | N/A | T/T |
| 1409 | AMZ1         | p.R292X  | rs55919423   | N/A | C/T |
| 1410 | VWDE         | p.R230X  | rs17165936   | N/A | G/A |
| 1411 | DNAH11       | p.E34X   | rs2285943    | N/A | T/T |
| 1412 | ZNF117       | p.R428X  | rs1404453    | N/A | A/A |
| 1413 | TYW1B        | p.W373X  | rs3015858    | N/A | T/T |
| 1414 | LRRD1        | p.E329X  | rs200099667  | N/A | C/A |
| 1415 | PVRIG        | p.E18X   | rs7786505    | N/A | G/T |
| 1416 | MUC3A        | p.Q2944X | rs79874934   | N/A | C/T |
| 1417 | PRSS1        | p.G177X  | rs1240508430 | N/A | G/T |
| 1418 | LPL          | p.S474X  | rs328        | N/A | C/G |
| 1419 | IDO2         | p.Y359X  | rs4503083    | N/A | T/A |
| 1420 | VPS13B       | p.Y413X  | rs7460625    | N/A | G/G |
| 1421 | IFNE         | p.Q71X   | rs2039381    | N/A | G/A |
| 1422 | KIAA1161     | p.Y23X   | rs4879782    | N/A | G/C |
| 1423 | OR1B1        | p.R192X  | rs1476860    | N/A | G/A |
| 1424 | POMT1        | p.Q251X  | rs3887873    | N/A | C/T |
| 1425 | ARMS2        | p.R38X   | rs2736911    | N/A | C/T |
| 1426 | PSTK         | p.C181X  | rs1848991631 | N/A | T/A |
| 1427 | OR51Q1       | p.R236X  | rs2647574    | N/A | C/T |
| 1428 | OR4X1        | p.Y273X  | rs10838851   | N/A | A/A |

|      |           |                    |              |     |     |
|------|-----------|--------------------|--------------|-----|-----|
| 1429 | OR4C16    | p.Q17X             | rs1459101    | N/A | C/T |
| 1430 | OR5AR1    | p.Q19X             | rs11228710   | N/A | C/T |
| 1431 | SLC22A24  | p.Y501X            | rs11231341   | N/A | C/C |
| 1432 | SLC22A10  | p.W96X             | rs1790218    | N/A | A/A |
| 1433 | ACTN3     | p.R620X            | rs1815739    | N/A | C/T |
| 1434 | CEP295    | p.L2557X           | rs980660332  | N/A | T/G |
| 1435 | OR8G1     | p.Y259X            | rs4268525    | N/A | G/G |
| 1436 | TAS2R31   | p.W300X            | rs78820764   | N/A | C/T |
| 1437 | TAS2R46   | p.W250X            | rs2708381    | N/A | C/T |
| 1438 | PRB4      | p.R39X             | rs12829245   | N/A | G/A |
| 1439 | SPERT     | p.C71X             | rs80072371   | N/A | C/A |
| 1440 | GPR33     | p.R140X            | rs17097921   | N/A | A/A |
| 1441 | GOLGA6L6  | p.E474X            | rs199807662  | N/A | C/A |
| 1442 | SPATA8    | p.R34X             | rs3812907    | N/A | C/T |
| 1443 | NTHL1     | p.Q90X             | rs150766139  | N/A | G/A |
| 1444 | PKD1L3    | p.R789X            | rs4788587    | N/A | G/A |
| 1445 | PKD1L2    | p.Q220X            | rs7499011    | N/A | G/A |
| 1446 | GGT6      | p.R152X            | rs7215121    | N/A | G/A |
| 1447 | C17orf107 | p.W152X            | rs35400274   | N/A | G/A |
| 1448 | MAP2K3    | p.Q73X             | rs55796947   | N/A | C/T |
| 1449 | KRT37     | p.Q235X            | rs78158550   | N/A | G/A |
| 1450 | KRT38     | p.Q235X            | rs148768443  | N/A | G/A |
| 1451 | C17orf77  | p.C207X            | rs545652     | N/A | C/A |
| 1452 | SERPINB11 | p.E90X             | rs4940595    | N/A | G/T |
| 1453 | PSG7      | p.R98X             | rs113247044  | N/A | G/A |
| 1454 | ZNF283    | p.Y599X            | rs756423061  | N/A | T/G |
| 1455 | FUT2      | p.W154X            | rs601338     | N/A | A/A |
| 1456 | DHDH      | p.Q233X            | rs10423255   | N/A | C/T |
| 1457 | LILRA2    | p.W175X            | rs1455280111 | N/A | G/A |
| 1458 | LILRA1    | p.G261X            | rs150508449  | N/A | G/T |
| 1459 | USP29     | p.Y913X            | rs9973206    | N/A | A/A |
| 1460 | LOC388780 | p.Q52X             | rs6137326    | N/A | C/T |
| 1461 | SIGLEC1   | p.E88X             | rs150358287  | N/A | C/A |
| 1462 | KIAA1755  | p.R510X            | rs41282820   | N/A | G/A |
| 1463 | TPTE      | p.R229X            | rs1810540    | N/A | C/T |
| 1464 | KRTAP13-2 | p.C135X            | rs877346     | N/A | A/T |
| 1465 | KRTAP10-6 | p.C261X            | rs233303     | N/A | G/T |
| 1466 | GAB4      | p.G163X            | rs28502153   | N/A | C/A |
| 1467 | CLDN5     | p.Q37X             | rs885985     | N/A | G/A |
| 1468 | RFPL1     | p.Q243X            | rs12484086   | N/A | T/T |
| 1469 | MAGEB16   | p.R272X            | rs4829392    | N/A | T/T |
| 1470 | OR2T35    | p.I320_R321delinsX | rs370874670  | N/A | /// |
| 1471 | NRP2      | p.C901_X902delinsX | rs200483574  | N/A | /// |
| 1472 | CCDC66    | p.L3_G4delinsLGX   | rs150150392  | N/A | /// |
| 1473 | RETNLB    | p.L14_L15delinsX   | rs368497660  | N/A | /// |



|             |          |                      |              |                     |     |
|-------------|----------|----------------------|--------------|---------------------|-----|
| 1474        | HLA-DQA1 | p.M99X               | rs199556640  | N/A                 | /// |
| 1475        | FAM20C   | p.L317_D318delinsLDR | rs771282640  | N/A                 | /// |
| 1476        | VWDE     | p.K1273_E1274delinsX | rs11454536   | N/A                 | /// |
| 1477        | TYW1B    | p.E339_S340delinsX   | rs11354897   | N/A                 | /// |
| 1478        | SSPO     | p.Y3861_C3862delinsX | N/A          | N/A                 | /// |
| 1479        | KMT2C    | p.Y816_I817delinsX   | rs150073007  | N/A                 | /// |
| 1480        | LILRB2   | p.L241X              | rs2080410040 | N/A                 | /// |
| 1481        | OR12D1   | N/A                  | rs28993580   | N/A                 | /// |
| 1482        | PKD1L2   | N/A                  | rs145602984  | N/A                 | /// |
| 1483        | MROH8    | p.A37delinsPCLX      | rs11467214   | N/A                 | /// |
| 1484        | MROH8    | p.Lys31X             | rs57415986   | N/A                 | /// |
| nDel Exonic |          |                      |              |                     |     |
| 1485        | FAM231B  | p.F71fs              | rs57681900   | frameshift deletion |     |
| 1486        | MST1L    | p.G298fs             | rs59375146   | frameshift deletion |     |
| 1487        | MST1L    | p.Q40fs              | rs113982165  | frameshift deletion |     |
| 1488        | UBXN11   | p.P499fs             | rs761408866  | frameshift deletion |     |
| 1489        | UBXN11   | p.G496fs             | rs749678087  | frameshift deletion |     |
| 1490        | AIM1L    | p.P538fs             | rs759140804  | frameshift deletion |     |
| 1491        | AIM1L    | p.G536fs             | rs755623773  | frameshift deletion |     |
| 1492        | AIM1L    | p.L524fs             | rs1460539649 | frameshift deletion |     |
| 1493        | CYP4B1   | p.D295fs             | rs3215983    | frameshift deletion |     |
| 1494        | NBPF8    | p.K39fs              | N/A          | frameshift deletion |     |
| 1495        | HRNR     | p.M1fs               | rs34061715   | frameshift deletion |     |
| 1496        | KIAA0040 | p.K68fs              | rs754204844  | frameshift deletion |     |
| 1497        | KIAA0040 | p.N65fs              | rs762930078  | frameshift deletion |     |
| 1498        | ACTN2    | p.P31fs              | rs11355106   | frameshift deletion |     |
| 1499        | OR2B11   | p.F8fs               | rs35305980   | frameshift deletion |     |
| 1500        | OR2T4    | p.I253fs             | rs34079073   | frameshift deletion |     |
| 1501        | OR2T35   | p.C203fs             | rs72452004   | frameshift deletion |     |
| 1502        | KIAA1841 | p.G695fs             | rs142269591  | frameshift deletion |     |
| 1503        | SULT1C3  | p.K222fs             | rs149535765  | frameshift deletion |     |
| 1504        | SCRN3    | p.I411fs             | rs145699077  | frameshift deletion |     |
| 1505        | NRP2     | p.S899fs             | rs527478913  | frameshift deletion |     |
| 1506        | CCR5     | p.Y184fs             | rs333        | frameshift deletion |     |
| 1507        | FRG2C    | p.R161fs             | rs373728386  | frameshift deletion |     |
| 1508        | OR5K4    | p.K299fs             | rs11288615   | frameshift deletion |     |
| 1509        | POLQ     | p.I1421fs            | rs546221341  | frameshift deletion |     |
| 1510        | ALG1L2   | p.G156fs             | rs55800015   | frameshift deletion |     |
| 1511        | COL6A5   | p.H2590fs            | rs11355796   | frameshift deletion |     |
| 1512        | HTR3E    | p.R21fs              | rs397897677  | frameshift deletion |     |
| 1513        | CLDN16   | p.R55fs              | rs368234054  | frameshift deletion |     |
| 1514        | MUC20    | p.A344fs             | rs1203696921 | frameshift deletion |     |
| 1515        | MUC20    | p.V205fs             | N/A          | frameshift deletion |     |
| 1516        | MUC20    | p.A344fs             | rs144288174  | frameshift deletion |     |
| 1517        | MUC4     | p.Q3693fs            | rs774501141  | frameshift deletion |     |



|      |           |           |              |                     |
|------|-----------|-----------|--------------|---------------------|
| 1518 | CRIPAK    | p.H201fs  | rs557758398  | frameshift deletion |
| 1519 | SLC9B1    | p.V446fs  | rs3974499    | frameshift deletion |
| 1520 | MAML3     | p.Q502fs  | rs373804063  | frameshift deletion |
| 1521 | MAML3     | p.Q498fs  | rs58287721   | frameshift deletion |
| 1522 | DCHS2     | p.N1365fs | rs140019361  | frameshift deletion |
| 1523 | SPATA4    | p.R279fs  | rs28381989   | frameshift deletion |
| 1524 | PCDHA4    | p.R71fs   | rs543774145  | frameshift deletion |
| 1525 | PCDHA4    | p.G73fs   | rs563991668  | frameshift deletion |
| 1526 | TIGD6     | p.Q344fs  | rs3832324    | frameshift deletion |
| 1527 | SPARC     | p.*342fs  | rs71757813   | frameshift deletion |
| 1528 | HLA-A     | p.Q250fs  | rs45576436   | frameshift deletion |
| 1529 | HLA-B     | p.Q94fs   | rs750527298  | frameshift deletion |
| 1530 | HLA-B     | p.R68fs   | rs200186034  | frameshift deletion |
| 1531 | MICA      | p.G180fs  | rs67841474   | frameshift deletion |
| 1532 | BTNL2     | p.H151fs  | rs370253771  | frameshift deletion |
| 1533 | HLA-DRB5  | p.A103fs  | rs780328684  | frameshift deletion |
| 1534 | HLA-DRB5  | p.Q39fs   | rs774167796  | frameshift deletion |
| 1535 | HLA-DRB1  | p.A103fs  | rs67476479   | frameshift deletion |
| 1536 | HLA-DRB1  | p.R101fs  | rs758506454  | frameshift deletion |
| 1537 | HLA-DRB1  | p.L37fs   | rs767010367  | frameshift deletion |
| 1538 | HLA-DQA1  | p.E73fs   | rs760671632  | frameshift deletion |
| 1539 | HLA-DQA1  | p.V91fs   | rs758294111  | frameshift deletion |
| 1540 | MYCT1     | p.R21fs   | rs3841162    | frameshift deletion |
| 1541 | SLC22A1   | p.P425fs  | rs113569197  | frameshift deletion |
| 1542 | TBP       | p.Q76fs   | rs796868804  | frameshift deletion |
| 1543 | TBP       | p.Q77fs   | rs770128377  | frameshift deletion |
| 1544 | MEOX2     | p.H69fs   | rs745896587  | frameshift deletion |
| 1545 | MEOX2     | p.H69fs   | rs780233864  | frameshift deletion |
| 1546 | POMZP3    | p.L187fs  | rs71819724   | frameshift deletion |
| 1547 | ZAN       | p.G2344fs | rs369526619  | frameshift deletion |
| 1548 | MUC3A     | p.A352fs  | rs1584799673 | frameshift deletion |
| 1549 | MUC3A     | p.S2935fs | rs764123091  | frameshift deletion |
| 1550 | ASB15     | p.A240fs  | rs138215101  | frameshift deletion |
| 1551 | PRSS2     | p.C234fs  | rs554627905  | frameshift deletion |
| 1552 | IQCA1L    | p.E459fs  | rs1317223808 | frameshift deletion |
| 1553 | ERI1      | p.*350fs  | rs140242735  | frameshift deletion |
| 1554 | PEBP4     | p.N220fs  | rs35121552   | frameshift deletion |
| 1555 | FAM205C   | p.A119fs  | rs151257262  | frameshift deletion |
| 1556 | CBWD5     | p.S102fs  | rs1187604683 | frameshift deletion |
| 1557 | ANKRD20A1 | p.L259fs  | rs1190757672 | frameshift deletion |
| 1558 | HSDL2     | p.I170fs  | rs10538330   | frameshift deletion |
| 1559 | RABEPK    | p.S133fs  | rs546948946  | frameshift deletion |
| 1560 | GLT6D1    | p.W143fs  | rs34217442   | frameshift deletion |
| 1561 | CASP7     | p.L43fs   | rs10553596   | frameshift deletion |
| 1562 | CHST15    | p.R456fs  | rs398015013  | frameshift deletion |

|      |             |           |              |                     |
|------|-------------|-----------|--------------|---------------------|
| 1563 | TMEM80      | p.T271fs  | rs35782494   | frameshift deletion |
| 1564 | MUC6        | p.Y1920fs | rs752117134  | frameshift deletion |
| 1565 | OR52B4      | p.L41fs   | rs11310407   | frameshift deletion |
| 1566 | OR51F1      | p.R92fs   | rs34672924   | frameshift deletion |
| 1567 | OR52Z1P     | p.G8fs    | rs5789371    | frameshift deletion |
| 1568 | OR51B5      | p.A66fs   | rs147062602  | frameshift deletion |
| 1569 | OR8U8,OR8U1 | p.I109fs  | rs767571255  | frameshift deletion |
| 1570 | FOLR3       | p.Y16fs   | rs71891516   | frameshift deletion |
| 1571 | MYO7A       | p.G1172fs | rs111033223  | frameshift deletion |
| 1572 | AKAP3       | p.S700fs  | rs67512580   | frameshift deletion |
| 1573 | TAS2R43     | p.G253fs  | rs765322779  | frameshift deletion |
| 1574 | OR6C76      | p.K308fs  | rs397719965  | frameshift deletion |
| 1575 | PTGES3      | wholegene | rs10579382   | frameshift deletion |
| 1576 | LRRIQ1      | p.E1699fs | rs398102301  | frameshift deletion |
| 1577 | NOC4L       | p.D299fs  | rs1565960277 | frameshift deletion |
| 1578 | NEK3        | p.T293fs  | rs1277302339 | frameshift deletion |
| 1579 | IFI27       | p.V41fs   | rs3064076    | frameshift deletion |
| 1580 | C14orf180   | p.*161fs  | rs111285011  | frameshift deletion |
| 1581 | NIPA2       | p.*361fs  | rs368460716  | frameshift deletion |
| 1582 | GOLGA6L2    | p.R694fs  | rs375981990  | frameshift deletion |
| 1583 | GOLGA6L2    | p.E673fs  | rs763821476  | frameshift deletion |
| 1584 | GOLGA6L2    | p.E659fs  | rs756870099  | frameshift deletion |
| 1585 | CHRFAM7A    | p.L76fs   | rs201490160  | frameshift deletion |
| 1586 | LOC283710   | p.P25fs   | rs3835087    | frameshift deletion |
| 1587 | TPSD1       | p.Q42fs   | rs3830782    | frameshift deletion |
| 1588 | UNKL        | p.R245fs  | rs1567228821 | frameshift deletion |
| 1589 | CNOT1       | p.F1543fs | rs5817153    | frameshift deletion |
| 1590 | PKD1L2      | p.N236fs  | rs548490632  | frameshift deletion |
| 1591 | ZFPM1       | p.E444fs  | rs796900280  | frameshift deletion |
| 1592 | ZFPM1       | p.P445fs  | rs67322929   | frameshift deletion |
| 1593 | CTU2        | p.R437fs  | rs11278302   | frameshift deletion |
| 1594 | GP1BA       | p.T435fs  | rs758041497  | frameshift deletion |
| 1595 | GP1BA       | p.S441fs  | rs770089708  | frameshift deletion |
| 1596 | KRTAP29-1   | p.P173fs  | rs144150438  | frameshift deletion |
| 1597 | EFCAB13     | p.S269fs  | rs10538163   | frameshift deletion |
| 1598 | CCDC40      | p.T1027fs | rs71163918   | frameshift deletion |
| 1599 | TGIF1       | p.P82fs   | rs11571510   | frameshift deletion |
| 1600 | ANKLE1      | p.G630fs  | rs58535756   | frameshift deletion |
| 1601 | ZNF626      | p.A461fs  | N/A          | frameshift deletion |
| 1602 | FCGBP       | p.E1221fs | N/A          | frameshift deletion |
| 1603 | FCGBP       | p.R1196fs | N/A          | frameshift deletion |
| 1604 | FCGBP       | p.Q1188fs | rs1374568639 | frameshift deletion |
| 1605 | FCGBP       | p.V1184fs | rs1213861174 | frameshift deletion |
| 1606 | ZNF283      | wholegene | rs71907168   | frameshift deletion |
| 1607 | DHDH        | p.E294fs  | rs3835153    | frameshift deletion |

|      |                   |               |              |                      |
|------|-------------------|---------------|--------------|----------------------|
| 1608 | ZNF480            | p.L2fs        | rs3217319    | frameshift deletion  |
| 1609 | ZNF880            | p.K105fs      | rs34470614   | frameshift deletion  |
| 1610 | LILRB5            | p.P599fs      | N/A          | frameshift deletion  |
| 1611 | LILRB1            | p.P366fs      | rs2064059683 | frameshift deletion  |
| 1612 | LILRB1            | p.Y373fs      | rs2064062450 | frameshift deletion  |
| 1613 | 2DL1,KIR2DS5,KIR2 | p.K176fs      | rs767604061  | frameshift deletion  |
| 1614 | KIR2DL4           | p.M318fs      | rs1280409609 | frameshift deletion  |
| 1615 | ZNF211            | p.V104fs      | rs34418076   | frameshift deletion  |
| 1616 | ZNF544            | p.R93fs       | rs570026104  | frameshift deletion  |
| 1617 | DEFB126           | p.G53fs       | rs11467497   | frameshift deletion  |
| 1618 | DEFB126           | p.T105fs      | rs11467417   | frameshift deletion  |
| 1619 | KRTAP19-6         | p.F57fs       | rs5843453    | frameshift deletion  |
| 1620 | SON               | p.R2416fs     | rs34373121   | frameshift deletion  |
| 1621 | KRTAP10-1         | p.D159fs      | rs782130783  | frameshift deletion  |
| 1622 | COL18A1           | p.G942fs      | rs149296338  | frameshift deletion  |
| 1623 | DDTL              | p.G114fs      | rs199896117  | frameshift deletion  |
| 1624 | APOL4             | p.E108fs      | N/A          | frameshift deletion  |
| 1625 | NUDT11            | wholegene     | rs782744505  | frameshift deletion  |
| 1626 | SLC25A5           | p.A150fs      | rs759019641  | frameshift deletion  |
| 1627 | MUC19             | N/A           | rs1163167564 | frameshift deletion  |
| 1628 | MUC19             | N/A           | rs1308102439 | frameshift deletion  |
| 1629 | MUC19             | N/A           | rs112524759  | frameshift deletion  |
| 1630 | MUC19             | N/A           | N/A          | UNKNOWN deletion     |
| 1631 | CDCP2             | p.M409fs      | rs3841798    | frameshift insertion |
| 1632 | CDCP2             | p.P408fs      | rs36013100   | frameshift insertion |
| 1633 | RHBG              | p.S392fs      | rs587735548  | frameshift insertion |
| 1634 | GPATCH4           | p.F357fs      | rs10637036   | frameshift insertion |
| 1635 | FMO2              | p.A527fs      | rs2234889    | frameshift insertion |
| 1636 | OR2W3             | p.V297fs      | rs112696640  | frameshift insertion |
| 1637 | PMS1              | p.F159fs      | rs3214425    | frameshift insertion |
| 1638 | OR5K3             | p.M299fs      | rs144759043  | frameshift insertion |
| 1639 | ATG3              | p.L307fs      | rs35560667   | frameshift insertion |
| 1640 | CRIPAK            | p.R154fs      | rs759566743  | frameshift insertion |
| 1641 | CPEB2             | p.G486fs      | N/A          | frameshift insertion |
| 1642 | SRA1              | p.V110fs      | rs3085220    | frameshift insertion |
| 1643 | SRA1              | p.V110fs      | rs5871740    | frameshift insertion |
| 1644 | ABCF1             | p.X846delinsX | rs4148252    | frameshift insertion |
| 1645 | PSORS1C1          | p.R37fs       | rs138474986  | frameshift insertion |
| 1646 | HLA-B             | p.Q94fs       | rs749557905  | frameshift insertion |
| 1647 | HLA-B             | p.E69fs       | rs9281379    | frameshift insertion |
| 1648 | HLA-B             | p.E69fs       | rs9281379    | frameshift insertion |
| 1649 | MICA              | p.G180fs      | rs41293539   | frameshift insertion |
| 1650 | HLA-DRB5          | p.D99fs       | rs771796054  | frameshift insertion |
| 1651 | HLA-DRB5          | p.E98fs       | rs776055221  | frameshift insertion |
| 1652 | HLA-DRB5          | p.Q39fs       | rs766955366  | frameshift insertion |

|      |          |               |              |                      |
|------|----------|---------------|--------------|----------------------|
| 1653 | HLA-DRB5 | p.L15fs       | rs756922265  | frameshift insertion |
| 1654 | HLA-DRB5 | p.L15fs       | rs745343465  | frameshift insertion |
| 1655 | HLA-DRB5 | p.L6fs        | rs747906579  | frameshift insertion |
| 1656 | HLA-DRB1 | p.A100fs      | rs200320734  | frameshift insertion |
| 1657 | HLA-DRB1 | p.P40fs       | rs749085224  | frameshift insertion |
| 1658 | HLA-DQA1 | p.F74fs       | rs764189141  | frameshift insertion |
| 1659 | HLA-DQA1 | p.A92fs       | rs777760029  | frameshift insertion |
| 1660 | HLA-DQA1 | p.I98fs       | rs9282026    | frameshift insertion |
| 1661 | CCDC129  | p.P1032fs     | rs35589779   | frameshift insertion |
| 1662 | ZAN      | p.C1923fs     | N/A          | frameshift insertion |
| 1663 | MUC3A    | p.I351fs      | rs1385837141 | frameshift insertion |
| 1664 | MUC3A    | p.R2936fs     | rs756000364  | frameshift insertion |
| 1665 | ARHGEF5  | p.M1fs        | rs766185415  | frameshift insertion |
| 1666 | SSPO     | p.S3069fs     | rs397815440  | frameshift insertion |
| 1667 | AGAP3    | p.G24fs       | rs539642617  | frameshift insertion |
| 1668 | AGAP3    | p.A27fs       | rs552859803  | frameshift insertion |
| 1669 | AGAP3    | p.C32fs       | rs766984834  | frameshift insertion |
| 1670 | LAPTM4B  | p.R67fs       | rs764278197  | frameshift insertion |
| 1671 | MROH6    | p.G676fs      | rs551319836  | frameshift insertion |
| 1672 | IFNK     | p.K10fs       | rs144060127  | frameshift insertion |
| 1673 | CBWD3    | p.Q257fs      | rs200498038  | frameshift insertion |
| 1674 | OR1J2    | p.Y102fs      | rs145911830  | frameshift insertion |
| 1675 | OBP2A    | p.Q194fs      | rs112851559  | frameshift insertion |
| 1676 | PTCHD3   | p.G308fs      | rs112067123  | frameshift insertion |
| 1677 | TMEM254  | p.S13fs       | rs113172526  | frameshift insertion |
| 1678 | MUC6     | p.T1922fs     | rs754561621  | frameshift insertion |
| 1679 | C11orf40 | p.M201fs      | rs141600462  | frameshift insertion |
| 1680 | C11orf40 | p.C200fs      | rs67037861   | frameshift insertion |
| 1681 | OR51B5   | p.S187fs      | rs113047337  | frameshift insertion |
| 1682 | OR51I2   | p.L238fs      | rs35301588   | frameshift insertion |
| 1683 | OR8J1    | p.X317delinsX | rs34649252   | frameshift insertion |
| 1684 | WNK1     | p.L740fs      | rs11441897   | frameshift insertion |
| 1685 | AKAP3    | p.G701fs      | rs200178782  | frameshift insertion |
| 1686 | CLECL1   | p.S52fs       | rs113222621  | frameshift insertion |
| 1687 | TAS2R43  | p.S254fs      | rs760672236  | frameshift insertion |
| 1688 | SLAIN1   | p.A73fs       | rs201380414  | frameshift insertion |
| 1689 | SLAIN1   | p.Q76fs       | rs542815284  | frameshift insertion |
| 1690 | OR11G2   | p.C227fs      | rs398077614  | frameshift insertion |
| 1691 | ZFYVE19  | p.W38fs       | rs142730574  | frameshift insertion |
| 1692 | C15orf40 | p.L132fs      | rs534261421  | frameshift insertion |
| 1693 | MESP1    | p.A53fs       | rs759335947  | frameshift insertion |
| 1694 | MESP1    | p.A53fs       | rs763577487  | frameshift insertion |
| 1695 | PGPEP1L  | p.V111fs      | rs398043625  | frameshift insertion |
| 1696 | IL32     | p.R113fs      | rs71818662   | frameshift insertion |
| 1697 | ZNF778   | p.E110fs      | rs10625512   | frameshift insertion |

|      |                   |              |              |                        |
|------|-------------------|--------------|--------------|------------------------|
| 1698 | KRTAP4-8          | p.M1fs       | rs201764113  | frameshift insertion   |
| 1699 | LOC100134391      | p.S283fs     | rs58614631   | frameshift insertion   |
| 1700 | TSPAN10           | p.F265fs     | N/A          | frameshift insertion   |
| 1701 | SETBP1            | p.L227fs     | rs3085861    | frameshift insertion   |
| 1702 | OR7G3             | p.S310fs     | rs111279560  | frameshift insertion   |
| 1703 | DCAF15            | p.E480fs     | rs141180609  | frameshift insertion   |
| 1704 | FCGBP             | p.G1220fs    | rs1330583248 | frameshift insertion   |
| 1705 | FCGBP             | p.D1195fs    | N/A          | frameshift insertion   |
| 1706 | FCGBP             | p.G1187fs    | rs1266581324 | frameshift insertion   |
| 1707 | FCGBP             | p.V1186fs    | N/A          | frameshift insertion   |
| 1708 | DHDH              | p.A170fs     | rs3830420    | frameshift insertion   |
| 1709 | EMC10             | p.L231fs     | rs200206091  | frameshift insertion   |
| 1710 | VSIG10L           | p.A859fs     | rs11402251   | frameshift insertion   |
| 1711 | SIGLEC12          | p.A66fs      | rs368715137  | frameshift insertion   |
| 1712 | LILRB2            | p.E239fs     | rs2080410693 | frameshift insertion   |
| 1713 | LILRB1            | p.W367fs     | rs2064060119 | frameshift insertion   |
| 1714 | LILRB1            | p.T372fs     | rs2064061088 | frameshift insertion   |
| 1715 | 2DS1,KIR2DS5,KIR2 | p.V177fs     | rs750502059  | frameshift insertion   |
| 1716 | KIR2DL4           | p.S267fs     | rs11371265   | frameshift insertion   |
| 1717 | KIR2DL4           | p.G319fs     | rs1168791468 | frameshift insertion   |
| 1718 | KIR2DS4           | p.S151fs     | rs551456772  | frameshift insertion   |
| 1719 | GNRH2             | p.E101fs     | rs16996832   | frameshift insertion   |
| 1720 | KIZ               | p.R13fs      | rs397791672  | frameshift insertion   |
| 1721 | ADNP              | p.K1016fs    | rs761350619  | frameshift insertion   |
| 1722 | SON               | p.G2412fs    | rs34377180   | frameshift insertion   |
| 1723 | PRDM15            | p.R88fs      | rs202107842  | frameshift insertion   |
| 1724 | KRTAP10-1         | p.S160fs     | rs781946879  | frameshift insertion   |
| 1725 | TCEAL6            | p.Q175fs     | rs11408120   | frameshift insertion   |
| 1726 | OR10J4            | N/A          | rs11419544   | frameshift insertion   |
| 1727 | ABO               | N/A          | rs8176719    | frameshift insertion   |
| 1728 | MUC19             | N/A          | rs5797672    | frameshift insertion   |
| 1729 | MUC19             | N/A          | rs60568788   | frameshift insertion   |
| 1730 | CYP2D6            | N/A          | rs149012039  | frameshift insertion   |
| 1731 | MUC19             | N/A          | rs879792835  | frameshift insertion   |
| 1732 | SERPINA2          | N/A          | N/A          | UNKNOWN insertion      |
| 1733 | CDK11A            | p.301_304del | rs199942750  | nonframeshift deletion |
| 1734 | TMEM52            | p.23_26del   | rs575852588  | nonframeshift deletion |
| 1735 | UBXN11            | p.490_492del | rs140364749  | nonframeshift deletion |
| 1736 | NRDC              | p.154_155del | rs35723519   | nonframeshift deletion |
| 1737 | CLCA4             | p.877_878del | rs4001061    | nonframeshift deletion |
| 1738 | GPSM2             | p.523_524del | rs35029887   | nonframeshift deletion |
| 1739 | EFNA3             | p.70_73del   | rs199552063  | nonframeshift deletion |
| 1740 | PRG4              | p.473_480del | rs770844232  | nonframeshift deletion |
| 1741 | SYT14             | p.186_186del | rs2307890    | nonframeshift deletion |
| 1742 | ITPKB             | p.92_95del   | rs147889095  | nonframeshift deletion |

|      |         |                |              |                        |
|------|---------|----------------|--------------|------------------------|
| 1743 | FMN2    | p.54_54del     | rs140531536  | nonframeshift deletion |
| 1744 | FMN2    | p.938_949del   | rs562038978  | nonframeshift deletion |
| 1745 | OR14A16 | p.163_164del   | rs35979231   | nonframeshift deletion |
| 1746 | OR2T27  | p.77_81del     | rs368069888  | nonframeshift deletion |
| 1747 | MYT1L   | p.162_163del   | rs764655663  | nonframeshift deletion |
| 1748 | ALLC    | p.301_301del   | rs201406139  | nonframeshift deletion |
| 1749 | APOB    | p.12_15del     | rs17240441   | nonframeshift deletion |
| 1750 | TSPYL6  | p.194_195del   | rs76397255   | nonframeshift deletion |
| 1751 | CEP68   | p.139_140del   | rs147392467  | nonframeshift deletion |
| 1752 | APLF    | p.312_313del   | rs139666972  | nonframeshift deletion |
| 1753 | AAK1    | p.541_542del   | rs3832159    | nonframeshift deletion |
| 1754 | ALMS1   | p.12_14del     | rs61156725   | nonframeshift deletion |
| 1755 | ALMS1   | p.524_525del   | rs797045227  | nonframeshift deletion |
| 1756 | TCF7L1  | p.8_8del       | rs566806913  | nonframeshift deletion |
| 1757 | EIF2AK3 | p.21_21del     | rs72416210   | nonframeshift deletion |
| 1758 | ADRA2B  | p.301_304del   | N/A          | nonframeshift deletion |
| 1759 | TMEM87B | p.166_167del   | rs71385858   | nonframeshift deletion |
| 1760 | TNFAIP6 | p.X278X        | rs35060021   | nonframeshift deletion |
| 1761 | SPATA3  | p.29_37del     | rs72362780   | nonframeshift deletion |
| 1762 | GIGYF2  | p.1210_1211del | rs10555297   | nonframeshift deletion |
| 1763 | KIF1A   | p.917_918del   | rs10594016   | nonframeshift deletion |
| 1764 | TMIE    | p.123_123del   | rs10578999   | nonframeshift deletion |
| 1765 | GPX1    | p.11_13del     | rs17838762   | nonframeshift deletion |
| 1766 | RPL29   | p.129_131del   | rs368982942  | nonframeshift deletion |
| 1767 | ZNF717  | p.650_652del   | rs201263569  | nonframeshift deletion |
| 1768 | OR5H6   | p.120_123del   | rs398062605  | nonframeshift deletion |
| 1769 | BBX     | p.397_398del   | rs34531902   | nonframeshift deletion |
| 1770 | USF3    | p.1470_1473del | rs112313093  | nonframeshift deletion |
| 1771 | CFAP100 | p.411_412del   | rs140223152  | nonframeshift deletion |
| 1772 | YEATS2  | p.804_804del   | rs146705467  | nonframeshift deletion |
| 1773 | MUC4    | p.3343_3369del | N/A          | nonframeshift deletion |
| 1774 | MUC4    | p.2937_2940del | rs1728040062 | nonframeshift deletion |
| 1775 | MUC4    | p.2937_2940del | rs756208448  | nonframeshift deletion |
| 1776 | MUC4    | p.2853_2900del | rs1560325547 | nonframeshift deletion |
| 1777 | MUC4    | p.2979_3011del | rs1728722813 | nonframeshift deletion |
| 1778 | MUC4    | p.1535_1551del | rs754456588  | nonframeshift deletion |
| 1779 | MUC4    | p.1433_1449del | rs751980714  | nonframeshift deletion |
| 1780 | MUC4    | p.1327_1343del | rs770878205  | nonframeshift deletion |
| 1781 | MUC4    | p.1104_1151del | rs1560389462 | nonframeshift deletion |
| 1782 | HTT     | p.18_19del     | rs374076986  | nonframeshift deletion |
| 1783 | DSPP    | p.1019_1024del | rs759454841  | nonframeshift deletion |
| 1784 | DSPP    | p.1023_1024del | rs750849673  | nonframeshift deletion |
| 1785 | DSPP    | p.1025_1035del | rs1238747995 | nonframeshift deletion |
| 1786 | DSPP    | p.1087_1089del | rs367717407  | nonframeshift deletion |
| 1787 | MAML3   | p.768_768del   | rs3051167    | nonframeshift deletion |

|      |          |                |              |                        |
|------|----------|----------------|--------------|------------------------|
| 1788 | CDKN2AIP | p.241_242del   | rs10533201   | nonframeshift deletion |
| 1789 | MAP3K1   | p.941_942del   | rs10552703   | nonframeshift deletion |
| 1790 | FOXD1    | p.303_303del   | N/A          | nonframeshift deletion |
| 1791 | GFM2     | p.641_643del   | rs5868753    | nonframeshift deletion |
| 1792 | MSH3     | p.52_57del     | rs201874762  | nonframeshift deletion |
| 1793 | MSH3     | p.66_68del     | rs144629981  | nonframeshift deletion |
| 1794 | CHD1     | p.1684_1684del | rs138635992  | nonframeshift deletion |
| 1795 | HAVCR1   | p.158_163del   | rs141023871  | nonframeshift deletion |
| 1796 | WWC1     | p.861_862del   | rs111457550  | nonframeshift deletion |
| 1797 | SLC34A1  | p.91_97del     | rs876661296  | nonframeshift deletion |
| 1798 | DOK3     | p.289_289del   | rs138153794  | nonframeshift deletion |
| 1799 | WRNIP1   | p.170_173del   | rs535821800  | nonframeshift deletion |
| 1800 | PRSS16   | p.506_510del   | rs141138864  | nonframeshift deletion |
| 1801 | MUC22    | p.1469_1472del | rs1324521685 | nonframeshift deletion |
| 1802 | MUC22    | p.1475_1478del | N/A          | nonframeshift deletion |
| 1803 | MUC22    | p.1480_1483del | rs1385650348 | nonframeshift deletion |
| 1804 | CYP21A2  | p.6_6del       | rs61338903   | nonframeshift deletion |
| 1805 | NOTCH4   | p.15_16del     | rs35795312   | nonframeshift deletion |
| 1806 | HLA-DRB5 | p.101_101del   | rs770709838  | nonframeshift deletion |
| 1807 | HLA-DQA1 | p.79_79del     | rs534654325  | nonframeshift deletion |
| 1808 | RRP36    | p.8_9del       | rs200886831  | nonframeshift deletion |
| 1809 | TTBK1    | p.750_750del   | rs113160341  | nonframeshift deletion |
| 1810 | FNDC1    | p.1471_1477del | rs141435210  | nonframeshift deletion |
| 1811 | MRPL18   | p.9_10del      | rs58504486   | nonframeshift deletion |
| 1812 | MAP3K4   | p.642_643del   | rs113801384  | nonframeshift deletion |
| 1813 | HGC6.3   | p.52_80del     | rs1798203599 | nonframeshift deletion |
| 1814 | TBP      | p.72_72del     | rs71815788   | nonframeshift deletion |
| 1815 | MEOX2    | p.76_77del     | rs113582077  | nonframeshift deletion |
| 1816 | SP8      | p.147_147del   | rs372591893  | nonframeshift deletion |
| 1817 | COA1     | p.58_58del     | rs143305109  | nonframeshift deletion |
| 1818 | NACAD    | p.614_654del   | rs1562927994 | nonframeshift deletion |
| 1819 | NACAD    | p.601_641del   | rs1562928025 | nonframeshift deletion |
| 1820 | COBL     | p.538_539del   | rs142060269  | nonframeshift deletion |
| 1821 | ZAN      | p.1922_1922del | rs1186793581 | nonframeshift deletion |
| 1822 | MUC3A    | p.389_390del   | N/A          | nonframeshift deletion |
| 1823 | LRRC17   | p.214_214del   | rs3832497    | nonframeshift deletion |
| 1824 | PODXL    | p.28_30del     | rs11277659   | nonframeshift deletion |
| 1825 | CREB3L2  | p.100_101del   | rs3217268    | nonframeshift deletion |
| 1826 | KIAA1549 | p.54_54del     | N/A          | nonframeshift deletion |
| 1827 | EPHB6    | p.165_166del   | rs764828501  | nonframeshift deletion |
| 1828 | OR2A14   | p.175_176del   | rs34602346   | nonframeshift deletion |
| 1829 | AGAP3    | p.31_32del     | rs776100575  | nonframeshift deletion |
| 1830 | WDR60    | p.104_105del   | rs145233696  | nonframeshift deletion |
| 1831 | SGK223   | p.1168_1170del | N/A          | nonframeshift deletion |
| 1832 | SGK223   | p.351_352del   | N/A          | nonframeshift deletion |

|      |          |                |             |                        |
|------|----------|----------------|-------------|------------------------|
| 1833 | FDFT1    | p.65_66del     | rs71711801  | nonframeshift deletion |
| 1834 | SLC39A14 | p.12_14del     | rs111662782 | nonframeshift deletion |
| 1835 | SFRP1    | p.13_14del     | rs3055861   | nonframeshift deletion |
| 1836 | RPL7     | p.9_9del       | rs556746526 | nonframeshift deletion |
| 1837 | ZFHx4    | p.2048_2048del | rs755670320 | nonframeshift deletion |
| 1838 | MAFA     | p.207_208del   | rs141816879 | nonframeshift deletion |
| 1839 | ARHGAP39 | p.376_376del   | rs138155129 | nonframeshift deletion |
| 1840 | PRSS3    | p.45_45del     | rs143332708 | nonframeshift deletion |
| 1841 | SPAG8    | p.182_186del   | rs141090907 | nonframeshift deletion |
| 1842 | MAMDC2   | p.355_355del   | rs61609258  | nonframeshift deletion |
| 1843 | PRUNE2   | p.2713_2718del | rs11267615  | nonframeshift deletion |
| 1844 | ZCCHC6   | p.226_227del   | rs397759922 | nonframeshift deletion |
| 1845 | NUTM2F   | p.691_691del   | rs150455117 | nonframeshift deletion |
| 1846 | MEGF9    | p.30_32del     | rs369989873 | nonframeshift deletion |
| 1847 | USP20    | p.358_358del   | rs10602985  | nonframeshift deletion |
| 1848 | HMCN2    | p.16_18del     | rs140466453 | nonframeshift deletion |
| 1849 | CACNA1B  | p.992_997del   | rs145816559 | nonframeshift deletion |
| 1850 | KAT6B    | p.1097_1097del | rs71929101  | nonframeshift deletion |
| 1851 | GSTO1    | p.154_154del   | rs113200905 | nonframeshift deletion |
| 1852 | KRTAP5-1 | p.110_120del   | rs775990209 | nonframeshift deletion |
| 1853 | KRTAP5-2 | p.93_103del    | rs59506446  | nonframeshift deletion |
| 1854 | KRTAP5-5 | p.182_191del   | rs576867883 | nonframeshift deletion |
| 1855 | SMPD1    | p.35_38del     | rs550365194 | nonframeshift deletion |
| 1856 | SCUBE2   | p.22_23del     | rs142900716 | nonframeshift deletion |
| 1857 | NUCB2    | p.401_402del   | rs3842269   | nonframeshift deletion |
| 1858 | FNBP4    | p.58_59del     | rs397711020 | nonframeshift deletion |
| 1859 | OR4X1    | p.190_191del   | rs57294041  | nonframeshift deletion |
| 1860 | MAML2    | p.604_607del   | rs141671766 | nonframeshift deletion |
| 1861 | TMPRSS13 | p.83_88del     | rs201746372 | nonframeshift deletion |
| 1862 | ADAMTS8  | p.21_22del     | rs10548872  | nonframeshift deletion |
| 1863 | ZNF384   | p.514_515del   | rs3835029   | nonframeshift deletion |
| 1864 | ATN1     | p.488_488del   | N/A         | nonframeshift deletion |
| 1865 | PLBD1    | p.25_26del     | rs147342083 | nonframeshift deletion |
| 1866 | PIK3C2G  | p.128_129del   | rs35277916  | nonframeshift deletion |
| 1867 | ATG101   | p.81_84del     | rs143921343 | nonframeshift deletion |
| 1868 | THAP2    | p.102_103del   | rs140783391 | nonframeshift deletion |
| 1869 | PHLDA1   | p.194_195del   | rs111754051 | nonframeshift deletion |
| 1870 | FAM109A  | p.146_148del   | rs139032867 | nonframeshift deletion |
| 1871 | VSIG10   | p.473_474del   | rs67582641  | nonframeshift deletion |
| 1872 | CHFR     | p.382_384del   | N/A         | nonframeshift deletion |
| 1873 | ERICH6B  | p.135_141del   | rs142875900 | nonframeshift deletion |
| 1874 | ZIC5     | p.420_421del   | rs71114653  | nonframeshift deletion |
| 1875 | HOMEZ    | p.536_537del   | rs35076736  | nonframeshift deletion |
| 1876 | FBXO33   | p.34_37del     | rs535061628 | nonframeshift deletion |
| 1877 | CCDC177  | p.177_179del   | rs147747237 | nonframeshift deletion |



|      |           |                |              |                        |
|------|-----------|----------------|--------------|------------------------|
| 1878 | CCDC177   | p.178_179del   | rs375620132  | nonframeshift deletion |
| 1879 | IRF2BPL   | p.123_125del   | rs200317113  | nonframeshift deletion |
| 1880 | RIN3      | p.967_967del   | rs570458246  | nonframeshift deletion |
| 1881 | TMEM121   | p.293_294del   | N/A          | nonframeshift deletion |
| 1882 | GOLGA6L6  | p.577_578del   | rs201222558  | nonframeshift deletion |
| 1883 | GOLGA6L2  | p.624_625del   | rs796716630  | nonframeshift deletion |
| 1884 | GOLGA6L2  | p.598_599del   | rs766696615  | nonframeshift deletion |
| 1885 | OTUD7A    | p.689_689del   | rs199744400  | nonframeshift deletion |
| 1886 | RYR3      | p.4438_4439del | rs3217346    | nonframeshift deletion |
| 1887 | LRRC49    | p.342_342del   | rs3834543    | nonframeshift deletion |
| 1888 | GOLGA6L9  | p.209_216del   | N/A          | nonframeshift deletion |
| 1889 | WDR73     | p.315_321del   | rs11267906   | nonframeshift deletion |
| 1890 | MESP2     | p.178_186del   | rs200021459  | nonframeshift deletion |
| 1891 | MESP2     | p.183_186del   | rs56192595   | nonframeshift deletion |
| 1892 | FAM174B   | p.69_71del     | rs66488707   | nonframeshift deletion |
| 1893 | ATF7IP2   | p.60_61del     | rs113642662  | nonframeshift deletion |
| 1894 | TNRC6A    | p.111_115del   | rs71156436   | nonframeshift deletion |
| 1895 | IST1      | p.243_244del   | rs372825060  | nonframeshift deletion |
| 1896 | ZFPM1     | p.446_447del   | rs67873604   | nonframeshift deletion |
| 1897 | PIZO1     | p.1878_1878del | rs150376294  | nonframeshift deletion |
| 1898 | MPRIIP    | p.178_179del   | rs113250356  | nonframeshift deletion |
| 1899 | KCNJ12    | p.333_333del   | rs112163749  | nonframeshift deletion |
| 1900 | KRT10     | p.490_493del   | rs778613907  | nonframeshift deletion |
| 1901 | KRTAP4-1  | p.82_85del     | rs71155126   | nonframeshift deletion |
| 1902 | KRTAP9-2  | p.139_143del   | rs542786200  | nonframeshift deletion |
| 1903 | KRTAP17-1 | p.46_50del     | rs796251471  | nonframeshift deletion |
| 1904 | QRICH2    | p.630_639del   | rs758349471  | nonframeshift deletion |
| 1905 | QRICH2    | p.581_582del   | rs34007000   | nonframeshift deletion |
| 1906 | USP36     | p.958_960del   | rs71964596   | nonframeshift deletion |
| 1907 | SLC38A10  | p.1071_1072del | rs10569617   | nonframeshift deletion |
| 1908 | TXNDC2    | p.238_252del   | rs781380178  | nonframeshift deletion |
| 1909 | CABLES1   | p.97_99del     | rs139352344  | nonframeshift deletion |
| 1910 | C18orf25  | p.313_314del   | rs34068795   | nonframeshift deletion |
| 1911 | POLI      | p.14_15del     | rs10584411   | nonframeshift deletion |
| 1912 | ALPK2     | p.1006_1011del | rs67925233   | nonframeshift deletion |
| 1913 | PLIN4     | p.731_797del   | rs66701788   | nonframeshift deletion |
| 1914 | KANK3     | p.674_675del   | rs111905975  | nonframeshift deletion |
| 1915 | CACNA1A   | p.2320_2325del | rs765169827  | nonframeshift deletion |
| 1916 | URI1      | p.298_299del   | rs3840928    | nonframeshift deletion |
| 1917 | DMKN      | p.270_271del   | rs72334573   | nonframeshift deletion |
| 1918 | FCGBP     | p.2632_2633del | rs1346321490 | nonframeshift deletion |
| 1919 | NUMBL     | p.435_437del   | rs141662737  | nonframeshift deletion |
| 1920 | ZNF284    | p.123_124del   | rs139900131  | nonframeshift deletion |
| 1921 | CD3EAP    | p.422_422del   | rs35729377   | nonframeshift deletion |
| 1922 | TPRX1     | p.206_210del   | rs781226540  | nonframeshift deletion |

|      |           |                      |              |                         |
|------|-----------|----------------------|--------------|-------------------------|
| 1923 | ZNF83     | p.267_295del         | rs1568523939 | nonframeshift deletion  |
| 1924 | FAM71E2   | p.778_786del         | rs67168196   | nonframeshift deletion  |
| 1925 | DEFB132   | p.6_8del             | rs371825938  | nonframeshift deletion  |
| 1926 | NINL      | p.958_959del         | rs34410422   | nonframeshift deletion  |
| 1927 | TP53TG5   | p.97_97del           | rs10546815   | nonframeshift deletion  |
| 1928 | CTSA      | p.29_29del           | rs397784956  | nonframeshift deletion  |
| 1929 | KRTAP10-2 | p.190_194del         | rs67692969   | nonframeshift deletion  |
| 1930 | DRICH1    | p.126_127del         | rs10564183   | nonframeshift deletion  |
| 1931 | CARD10    | p.272_273del         | rs113275238  | nonframeshift deletion  |
| 1932 | CDC42EP1  | p.253_260del         | rs200195385  | nonframeshift deletion  |
| 1933 | TRIOBP    | p.398_398del         | rs55745992   | nonframeshift deletion  |
| 1934 | TRIOBP    | p.538_539del         | rs36219868   | nonframeshift deletion  |
| 1935 | BAIAP2L2  | p.441_455del         | rs371997714  | nonframeshift deletion  |
| 1936 | TCF20     | p.322_323del         | rs552166978  | nonframeshift deletion  |
| 1937 | SUPT20HL1 | p.517_518del         | rs762156994  | nonframeshift deletion  |
| 1938 | SUPT20HL1 | p.520_526del         | rs1569203623 | nonframeshift deletion  |
| 1939 | FAM47A    | p.518_530del         | N/A          | nonframeshift deletion  |
| 1940 | MUC2      | p.Thr4174_Ile4196del | rs1858695544 | nonframeshift deletion  |
| 1941 | MUC19     | N/A                  | rs766853816  | nonframeshift deletion  |
| 1942 | NADK      | p.G591delinsEG       | rs150880809  | nonframeshift insertion |
| 1943 | RERE      | p.R17delinsRDR       | rs201665914  | nonframeshift insertion |
| 1944 | MDS2      | p.V93delinsVR        | rs3072132    | nonframeshift insertion |
| 1945 | SERINC2   | p.T308delinsTQ       | rs3050461    | nonframeshift insertion |
| 1946 | FOXD2     | p.H287delinsHPH      | rs3046924    | nonframeshift insertion |
| 1947 | IGSF3     | p.D1041delinsED      | rs576658823  | nonframeshift insertion |
| 1948 | NBPF12    | p.Y932delinsYVLD     | rs1553888457 | nonframeshift insertion |
| 1949 | LCE4A     | p.S43delinsSSSGGCC   | rs11269814   | nonframeshift insertion |
| 1950 | LOR       | p.G21delinsGGG       | rs150026164  | nonframeshift insertion |
| 1951 | LOR       | p.Y189delinsYSGGG    | rs11272549   | nonframeshift insertion |
| 1952 | KCNN3     | p.P81delinsQQQQP     | rs3831942    | nonframeshift insertion |
| 1953 | KCNN3     | P81delinsQQQQQQQQ    | N/A          | nonframeshift insertion |
| 1954 | SEC16B    | 79delinsGPKAPMKFY    | rs762937108  | nonframeshift insertion |
| 1955 | IGFN1     | SVNETGYRKDLGVP       | N/A          | nonframeshift insertion |
| 1956 | HADHB     | p.M1delinsMT         | rs1064793144 | nonframeshift insertion |
| 1957 | TMEM247   | 8delinsQRQHEVVMEO    | rs70940616   | nonframeshift insertion |
| 1958 | LHCGR     | p.P19delinsLQP       | rs376653903  | nonframeshift insertion |
| 1959 | TMEM37    | p.T70delinsSVP       | rs3217464    | nonframeshift insertion |
| 1960 | DARS      | p.R8delinsASR        | rs551090724  | nonframeshift insertion |
| 1961 | PDE11A    | p.P672delinsSP       | rs3830637    | nonframeshift insertion |
| 1962 | ZNF804A   | p.N696delinsNT       | rs3046266    | nonframeshift insertion |
| 1963 | FAM171B   | p.Q43delinsQQ        | rs549897920  | nonframeshift insertion |
| 1964 | CPS1      | p.I5delinsIF         | rs61509952   | nonframeshift insertion |
| 1965 | TTLL3     | p.L123delinsLD       | rs34761997   | nonframeshift insertion |
| 1966 | EOMES     | p.A120delinsGAA      | rs3062761    | nonframeshift insertion |
| 1967 | RPL14     | p.T149delinsTAAAAA   | rs369485042  | nonframeshift insertion |

|      |          |                    |              |                         |
|------|----------|--------------------|--------------|-------------------------|
| 1968 | TRAK1    | p.T688delinsTE     | rs10634555   | nonframeshift insertion |
| 1969 | LTF      | p.R10delinsRR      | rs10662431   | nonframeshift insertion |
| 1970 | RPL29    | p.D131delinsAKD    | rs71084167   | nonframeshift insertion |
| 1971 | CCDC66   | p.S606delinsSP     | rs112267342  | nonframeshift insertion |
| 1972 | ATXN7    | p.R29delinsRQQ     | rs1060499845 | nonframeshift insertion |
| 1973 | LNP1     | nsHPRRHSHEDQEFRQ   | rs71132521   | nonframeshift insertion |
| 1974 | USF3     | p.Q1473delinsQQQ   | rs879138126  | nonframeshift insertion |
| 1975 | MAGEF1   | p.D159delinsED     | rs112819846  | nonframeshift insertion |
| 1976 | MUC4     | QATPLPVTSTSSVSTG   | N/A          | nonframeshift insertion |
| 1977 | MUC4     | SVSTGDTTPLPVTDA    | rs1727440275 | nonframeshift insertion |
| 1978 | MUC4     | delinsLASTGHTTLPV  | rs771345062  | nonframeshift insertion |
| 1979 | MUC4     | delinsPLPVTDTSSAST | rs1553875496 | nonframeshift insertion |
| 1980 | MUC4     | p.S2026delinsSS    | rs112774151  | nonframeshift insertion |
| 1981 | MUC4     | TDASSVSTGHATSLP    | rs1731410319 | nonframeshift insertion |
| 1982 | MUC4     | STGHATPLPVTDNSS    | rs1732020095 | nonframeshift insertion |
| 1983 | MUC4     | STSSASTGHATPLPV    | rs1732040728 | nonframeshift insertion |
| 1984 | MUC4     | p.T113delinsTVTQET | rs142781032  | nonframeshift insertion |
| 1985 | RNF212   | S241delinsWLAPAWA  | rs138488801  | nonframeshift insertion |
| 1986 | CPEB2    | p.R169delinsRQ     | rs576522935  | nonframeshift insertion |
| 1987 | POU4F2   | p.G55delinsGG      | rs530695040  | nonframeshift insertion |
| 1988 | ZSWIM6   | p.P18delinsPG      | rs565100893  | nonframeshift insertion |
| 1989 | MCC      | p.S22delinsGS      | rs35336557   | nonframeshift insertion |
| 1990 | KCNN2    | p.A53delinsAA      | rs151038013  | nonframeshift insertion |
| 1991 | PRDM6    | p.T88delinsTSAS    | rs199942027  | nonframeshift insertion |
| 1992 | SOWAHA   | p.L3delinsLAAA     | rs566990199  | nonframeshift insertion |
| 1993 | PCDHA4   | p.G70delinsGH      | rs200172095  | nonframeshift insertion |
| 1994 | DIAPH1   | p.P618delinsPP     | rs3075570    | nonframeshift insertion |
| 1995 | PCDH12   | p.R1182delinsSSSR  | rs5871792    | nonframeshift insertion |
| 1996 | ADAMTS2  | p.P24delinsLP      | rs568040559  | nonframeshift insertion |
| 1997 | FOXF2    | p.G301delinsGG     | rs111257067  | nonframeshift insertion |
| 1998 | ATXN1    | p.H226delinsQH     | rs765686161  | nonframeshift insertion |
| 1999 | NOTCH4   | p.L16delinsLL      | rs546167192  | nonframeshift insertion |
| 2000 | HLA-DRB5 | p.P7delinsLA       | rs774116269  | nonframeshift insertion |
| 2001 | PRICKLE4 | p.L287delinsLL     | rs140326303  | nonframeshift insertion |
| 2002 | FAM46A   | p.G44delinsGGDFGG  | rs754008809  | nonframeshift insertion |
| 2003 | PRDM13   | p.D371delinsDP     | rs112674667  | nonframeshift insertion |
| 2004 | TSPYL1   | p.K177delinsVK     | rs397735194  | nonframeshift insertion |
| 2005 | AKAP12   | p.I1530delinsIE    | rs113116275  | nonframeshift insertion |
| 2006 | ARID1B   | p.A445delinsAP     | rs572236007  | nonframeshift insertion |
| 2007 | FAM120B  | 06delinsDPEPRQEVPM | rs1265015773 | nonframeshift insertion |
| 2008 | TMEM184A | p.S393delinsGS     | rs112463195  | nonframeshift insertion |
| 2009 | ANLN     | p.T294delinsTS     | rs61549495   | nonframeshift insertion |
| 2010 | PCLO     | p.E2927delinsDE    | rs10630259   | nonframeshift insertion |
| 2011 | FZD1     | p.Q88delinsQP      | rs139480179  | nonframeshift insertion |
| 2012 | AKAP9    | p.K1335delinsKQ    | rs10644111   | nonframeshift insertion |

|      |           |                    |              |                         |
|------|-----------|--------------------|--------------|-------------------------|
| 2013 | DLX6      | p.Q44delinsQP      | rs559903070  | nonframeshift insertion |
| 2014 | MUC3A     | p.P205delinsPS     | rs111723000  | nonframeshift insertion |
| 2015 | MUC3A     | p.P2577delinsPT    | rs112753297  | nonframeshift insertion |
| 2016 | MUC12     | p.T18delinsTA      | rs150485202  | nonframeshift insertion |
| 2017 | RP1L1     | delinsGTKVIEGLQEER | rs1585963467 | nonframeshift insertion |
| 2018 | RP1L1     | p.T1327delinsET    | rs146656804  | nonframeshift insertion |
| 2019 | BHLHE22   | p.S90delinsSG      | rs544639534  | nonframeshift insertion |
| 2020 | BHLHE22   | p.G220delinsGSG    | rs763704164  | nonframeshift insertion |
| 2021 | ADCK5     | p.L419delinsLGVQGE | rs782071356  | nonframeshift insertion |
| 2022 | LURAP1L   | p.G49delinsGGGG    | rs139315731  | nonframeshift insertion |
| 2023 | PRUNE2    | p.S1019delinsLQQSS | rs11267622   | nonframeshift insertion |
| 2024 | PHF2      | p.T987delinsTPASTT | rs149736720  | nonframeshift insertion |
| 2025 | HABP4     | p.E60delinsEAA     | rs753920168  | nonframeshift insertion |
| 2026 | CCDC180   | p.E772delinsEEE    | rs113264216  | nonframeshift insertion |
| 2027 | C9orf43   | p.R296delinsRQ     | rs527300639  | nonframeshift insertion |
| 2028 | SKIDA1    | p.G429delinsEEG    | rs112207161  | nonframeshift insertion |
| 2029 | EBLN1     | p.L143delinsLL     | rs3059425    | nonframeshift insertion |
| 2030 | GPRIN2    | p.A243delinsEVGA   | rs554090811  | nonframeshift insertion |
| 2031 | KIF20B    | p.L1062delinsLKV   | rs55921521   | nonframeshift insertion |
| 2032 | PDZD7     | p.S785delinsRSS    | rs200896335  | nonframeshift insertion |
| 2033 | PCGF6     | p.P28delinsPPP     | rs113359610  | nonframeshift insertion |
| 2034 | AFAP1L2   | p.G111delinsRG     | rs60778514   | nonframeshift insertion |
| 2035 | CTBP2     | A390delinsALQPQPA  | rs372118432  | nonframeshift insertion |
| 2036 | KRTAP5-1  | GSKGGCGSCGGCKC     | rs1590818751 | nonframeshift insertion |
| 2037 | KRTAP5-5  | p.G43delinsGGCGS   | rs71025763   | nonframeshift insertion |
| 2038 | ART5      | p.I25delinsTI      | rs3062849    | nonframeshift insertion |
| 2039 | OR52Z1P   | p.I167delinsMGI    | rs113029548  | nonframeshift insertion |
| 2040 | DNHD1     | p.A1909delinsAALLH | rs1554888386 | nonframeshift insertion |
| 2041 | MICALCL   | p.A456delinsAPPPP  | rs3841216    | nonframeshift insertion |
| 2042 | SAAL1     | p.G11delinsPG      | rs148650821  | nonframeshift insertion |
| 2043 | C11orf80  | p.G26delinsGAA     | rs567536854  | nonframeshift insertion |
| 2044 | KRTAP5-7  | 110delinsSCCQSSCCK | rs771895560  | nonframeshift insertion |
| 2045 | KRTAP5-8  | p.G8delinsGGCGSGCG | rs537752041  | nonframeshift insertion |
| 2046 | KRTAP5-8  | nsSQSSCCKPCCCSSC   | rs1565619685 | nonframeshift insertion |
| 2047 | KRTAP5-10 | 92delinsGGCGSCGGS  | rs71272260   | nonframeshift insertion |
| 2048 | NOX4      | p.M4delinsEM       | rs34495256   | nonframeshift insertion |
| 2049 | DCP1B     | p.Q261delinsQQ     | rs111543431  | nonframeshift insertion |
| 2050 | FAM90A1   | p.T344delinsTV     | rs71265055   | nonframeshift insertion |
| 2051 | KRT6B     | p.L405delinsNL     | rs774025074  | nonframeshift insertion |
| 2052 | KRT2      | p.F102delinsGF     | rs56850150   | nonframeshift insertion |
| 2053 | KRT2      | p.S101delinsGFGGGS | rs57149265   | nonframeshift insertion |
| 2054 | KRT4      | delinsAGGFGAGFGTG  | rs11267392   | nonframeshift insertion |
| 2055 | RBM19     | p.V296delinsTV     | rs55840068   | nonframeshift insertion |
| 2056 | CAMKK2    | p.G539delinsKG     | rs398021385  | nonframeshift insertion |
| 2057 | WDR66     | p.G62delinsGEEEEK  | rs1030446606 | nonframeshift insertion |

|      |          |                    |              |                         |
|------|----------|--------------------|--------------|-------------------------|
| 2058 | LRRC43   | K333delinsKGEKDKK  | rs752145826  | nonframeshift insertion |
| 2059 | NCOR2    | p.G1840delinsSSGG  | rs143952466  | nonframeshift insertion |
| 2060 | NCOR2    | p.P511delinsQP     | rs372331070  | nonframeshift insertion |
| 2061 | NCOR2    | p.P511delinsQQP    | rs35831183   | nonframeshift insertion |
| 2062 | BRI3BP   | p.L15delinsLL      | rs546819378  | nonframeshift insertion |
| 2063 | EP400    | p.Q2727delinsQQ    | rs60608267   | nonframeshift insertion |
| 2064 | EP400    | p.Q2727delinsQQQ   | rs528214697  | nonframeshift insertion |
| 2065 | RBM23    | p.Q394delinsAQ     | rs397812315  | nonframeshift insertion |
| 2066 | ACIN1    | p.R644delinsHSR    | rs34870944   | nonframeshift insertion |
| 2067 | NOP9     | p.A161delinsAE     | rs113258190  | nonframeshift insertion |
| 2068 | NOP9     | p.A161delinsAEE    | rs113258190  | nonframeshift insertion |
| 2069 | DDHD1    | p.S113delinsGGS    | rs140904345  | nonframeshift insertion |
| 2070 | ATXN3    | delinsQQQQQQQQQQ   | rs193922928  | nonframeshift insertion |
| 2071 | RTL1     | p.E152delinsEE     | rs35401447   | nonframeshift insertion |
| 2072 | GOLGA6L2 | p.A873delinsDA     | rs34879341   | nonframeshift insertion |
| 2073 | GOLGA6L2 | G567delinsEAGGEDA  | rs748500078  | nonframeshift insertion |
| 2074 | GOLGA8R  | p.D272delinsQD     | rs372647671  | nonframeshift insertion |
| 2075 | ARIH1    | p.G78delinsGG      | rs1060499844 | nonframeshift insertion |
| 2076 | LOXL1    | p.V260delinsVP     | rs776481735  | nonframeshift insertion |
| 2077 | ARID3B   | p.L4delinsLQ       | rs770169890  | nonframeshift insertion |
| 2078 | ASPHD1   | p.Q170delinsQG     | rs140411458  | nonframeshift insertion |
| 2079 | JPH3     | p.P144delinsPAA    | rs71156237   | nonframeshift insertion |
| 2080 | BCL6B    | p.S234delinsSS     | rs146207245  | nonframeshift insertion |
| 2081 | KDM6B    | p.L251delinsLPP    | rs61462443   | nonframeshift insertion |
| 2082 | CENPV    | p.A22delinsGASA    | rs539910742  | nonframeshift insertion |
| 2083 | FAM83G   | p.R820delinsHR     | rs3071666    | nonframeshift insertion |
| 2084 | KRTAP4-5 | p.Q82delinsRPSCCQ  | rs535144703  | nonframeshift insertion |
| 2085 | KRTAP9-1 | C153delinsCCGSSCCQ | rs71155128   | nonframeshift insertion |
| 2086 | KRTAP9-9 | p.P11delinsPTCCRT  | rs540633489  | nonframeshift insertion |
| 2087 | HOXB1    | p.P28delinsHSAP    | rs145570960  | nonframeshift insertion |
| 2088 | EME1     | p.K137delinsKQ     | rs3060668    | nonframeshift insertion |
| 2089 | ANKRD40  | p.D106delinsDD     | rs138572332  | nonframeshift insertion |
| 2090 | PPM1E    | p.P33delinsPEP     | rs201186780  | nonframeshift insertion |
| 2091 | GRIN2C   | p.L1049delinsPPEL  | rs139495021  | nonframeshift insertion |
| 2092 | GNAL     | p.P36delinsPAL     | rs201898548  | nonframeshift insertion |
| 2093 | GREB1L   | p.D1861delinsDL    | rs10654340   | nonframeshift insertion |
| 2094 | RTTN     | p.D243delinsGD     | rs58913700   | nonframeshift insertion |
| 2095 | CNDP1    | p.V15delinsVL      | rs10663835   | nonframeshift insertion |
| 2096 | KCNG2    | p.P8delinsPG       | rs71338073   | nonframeshift insertion |
| 2097 | OR7C2    | p.V228delinsVS     | rs3044711    | nonframeshift insertion |
| 2098 | GDF1     | p.A157delinsAA     | rs571387097  | nonframeshift insertion |
| 2099 | CEBPA    | p.P197delinsHPP    | rs762459325  | nonframeshift insertion |
| 2100 | LSR      | p.G518delinsGR     | rs112341068  | nonframeshift insertion |
| 2101 | DMKN     | p.G270delinsGSSS   | rs763222290  | nonframeshift insertion |
| 2102 | FCGBP    | p.C2635delinsPC    | rs1378703310 | nonframeshift insertion |

|          |          |                      |              |                         |     |
|----------|----------|----------------------|--------------|-------------------------|-----|
| 2103     | FCGBP    | p.Q1188delinsLQ      | rs1228186040 | nonframeshift insertion |     |
| 2104     | HRC      | p.V262delinsDV       | rs555002410  | nonframeshift insertion |     |
| 2105     | NR1H2    | p.K172delinsKQ       | rs34296657   | nonframeshift insertion |     |
| 2106     | ZNF880   | p.I138delinsIN       | rs34678014   | nonframeshift insertion |     |
| 2107     | HSPBP1   | p.S31delinsGGGS      | rs10701478   | nonframeshift insertion |     |
| 2108     | SSC5D    | p.P1325delinsPT      | rs150781976  | nonframeshift insertion |     |
| 2109     | ZNF814   | p.E297delinsYE       | rs10687775   | nonframeshift insertion |     |
| 2110     | RALY     | p.A230delinsAS       | rs10649600   | nonframeshift insertion |     |
| 2111     | SYNJ1    | p.L1406delinsNTL     | rs57257560   | nonframeshift insertion |     |
| 2112     | C21orf58 | p.H299delinsHH       | rs112899928  | nonframeshift insertion |     |
| 2113     | TMEM191B | p.F159delinsFY       | rs547549857  | nonframeshift insertion |     |
| 2114     | MED15    | p.L210delinsLQ       | rs748572492  | nonframeshift insertion |     |
| 2115     | NEFH     | p.A646delinsAKSPEKA  | rs147489453  | nonframeshift insertion |     |
| 2116     | BAIAP2L2 | p.N412delinsTPMN     | rs142739979  | nonframeshift insertion |     |
| 2117     | SYNGR1   | p.P202delinsPN       | rs149306472  | nonframeshift insertion |     |
| 2118     | DCAF8L2  | p.E129delinsEE       | rs745536197  | nonframeshift insertion |     |
| 2119     | SHROOM4  | p.E1138delinsEE      | rs143151534  | nonframeshift insertion |     |
| 2120     | SHROOM4  | p.Q1128delinsQQQQQ   | rs201922875  | nonframeshift insertion |     |
| 2121     | AR       | p.L57delinsLQ        | rs3032358    | nonframeshift insertion |     |
| 2122     | AR       | p.G456delinsGG       | rs760580125  | nonframeshift insertion |     |
| 2123     | RBMXL3   | p.L393delinsRGRSPNAH | rs55659078   | nonframeshift insertion |     |
| 2124     | MUC19    | N/A                  | rs145652182  | nonframeshift insertion |     |
| 2125     | MUC19    | N/A                  | rs528940514  | nonframeshift insertion |     |
| StopLoss |          |                      |              |                         |     |
| 2126     | PRSS48   | p.X329E              | rs2407221    | N/A                     | G/G |
| 2127     | TAP2     | p.X687Q              | rs241448     | N/A                     | A/G |
| 2128     | NPSR1    | p.X391R              | rs10275028   | N/A                     | T/C |
| 2129     | PTCHD3   | p.X768Q              | rs2505323    | N/A                     | G/G |
| 2130     | SNCG     | p.X127C              | rs9864       | N/A                     | T/T |
| 2131     | OR1S1    | p.X326W              | rs7103033    | N/A                     | A/G |
| 2132     | TAS2R19  | p.X300W              | rs79475879   | N/A                     | T/C |
| 2133     | CEP89    | p.X784Q              | rs745961     | N/A                     | A/G |
| 2134     | ZNF568   | p.X636R              | rs1667366    | N/A                     | T/C |
| 2135     | NLRP8    | p.X1049Y             | rs306457     | N/A                     | G/C |
| 2136     | ZBP1     | p.X249L              | rs1267733750 | N/A                     | T/A |
| 2137     | FTCDNL1  | p.X148delinsL        | rs761406357  | N/A                     | /// |

**Table S4. Damaging mutations, unique for Index Patient S13**

267 damaging mutations according to HVAR scores identified in patient S13, potential contributors to a unique ACE phenotype. These mutations were identified by subtracting damaging mutations common to a control group of 16 patients without the unique ACE phenotype specific for Patient S13 (Table S3) from the damaging mutations found in patient S13 (Table S2). There are two prediction classifications **D** (Probably damaging, score $\geq$ 0.909), **P** (possibly damaging, 0.446 $\leq$ score $\leq$ 0.908).

| NO.<br>SNP | GeneName | AAChange | ID          | PolyPhen-2<br>(HVAR) | Genotype |
|------------|----------|----------|-------------|----------------------|----------|
| 1          | PPP1R16B | p.K431Q  | rs61752055  | 0.451,P              | A/C      |
| 2          | PSG9     | p.A212S  | rs150423600 | 0.457,P              | C/A      |
| 3          | HLX      | p.Q125H  | rs62621984  | 0.459,P              | A/C      |
| 4          | IL16     | p.P434S  | rs4072111   | 0.468,P              | C/T      |
| 5          | CMYA5    | p.D190G  | rs10942901  | 0.469,P              | A/G      |
| 6          | KIF26B   | p.T1302M | rs199742874 | 0.475,P              | C/T      |
| 7          | NOXO1    | p.R39H   | rs117304081 | 0.486,P              | C/T      |
| 8          | SAMD9    | p.V549L  | rs10279499  | 0.489,P              | C/A      |
| 9          | C8orf46  | p.A79S   | rs61736270  | 0.497,P              | G/T      |
| 10         | KRT37    | p.P434S  | rs17737019  | 0.500,P              | G/A      |
| 11         | SYCP2L   | p.N647D  | rs3798751   | 0.503,P              | A/G      |
| 12         | ANKRD18A | p.Y750C  | rs2799163   | 0.515,P              | T/C      |
| 13         | CDHR3    | p.L506F  | rs76067797  | 0.522,P              | C/T      |
| 14         | ZFHX4    | p.P1273S | rs61729527  | 0.531,P              | C/T      |
| 15         | GOLGA2   | p.R686W  | rs72756867  | 0.533,P              | G/A      |
| 16         | LILRA6   | p.G149R  | rs1052966   | 0.535,P              | T/T      |
| 17         | ZNF653   | p.E352K  | rs74552618  | 0.546,P              | C/T      |
| 18         | FMO2     | p.E314G  | rs2020863   | 0.555,P              | A/G      |
| 19         | ITIH2    | p.L569V  | rs7084817   | 0.556,P              | C/G      |
| 20         | SNTG2    | p.S200L  | rs6751090   | 0.560,P              | C/T      |
| 21         | NCAPG2   | p.A132S  | N/A         | 0.569,P              | C/A      |
| 22         | DSPP     | p.D1074G | rs202210195 | 0.583,P              | A/G      |
| 23         | OSBPL1A  | p.S810P  | rs35693789  | 0.583,P              | A/G      |
| 24         | CASP12   | p.T21I   | rs138698464 | 0.589,P              | G/A      |
| 25         | SHBG     | p.P185L  | rs6258      | 0.591,P              | C/T      |
| 26         | MAFA     | p.G347C  | rs62521874  | 0.615,P              | A/A      |
| 27         | MRPL28   | p.D160E  | rs11557302  | 0.628,P              | G/C      |
| 28         | S1PR2    | p.V286A  | rs117064827 | 0.630,P              | A/G      |
| 29         | RYR3     | p.N2016S | rs942844610 | 0.636,P              | A/G      |
| 30         | ZNF254   | p.D593   | rs17854260  | 0.641,P              | A/G      |
| 31         | DNAJC17  | p.V204L  | rs117485355 | 0.647,P              | C/G      |
| 32         | C10orf11 | p.S153F  | rs35349706  | 0.652,P              | T/T      |
| 33         | MOCOS    | p.S22R   | rs113873219 | 0.652,P              | C/A      |
| 34         | TSEN54   | p.I137L  | rs11559205  | 0.656,P              | A/C      |
| 35         | TAS2R43  | p.L235F  | rs3759244   | 0.658,P              | A/A      |



|    |         |          |              |                |     |
|----|---------|----------|--------------|----------------|-----|
| 36 | LAMA4   | p.R545C  | rs138153075  | <b>0.659,P</b> | G/A |
| 37 | FXYD4   | p.D28H   | rs150156235  | <b>0.669,P</b> | G/C |
| 38 | KRT6C   | p.G111D  | rs394598     | <b>0.672,P</b> | T/T |
| 39 | PTPRB   | p.G1934A | rs17226367   | <b>0.683,P</b> | C/G |
| 40 | IGFN1   | p.S3069R | rs61743921   | <b>0.686,P</b> | C/A |
| 41 | RANBP3L | p.V471D  | rs145254521  | <b>0.692,P</b> | A/T |
| 42 | SH3TC2  | p.M1184V | rs142451273  | <b>0.695,P</b> | T/C |
| 43 | VPS13D  | p.S3777C | rs149521489  | <b>0.698,P</b> | C/G |
| 44 | NECAB1  | p.A271S  | rs115555424  | <b>0.700,P</b> | G/T |
| 45 | TNC     | p.R322Q  | rs145315080  | <b>0.701,P</b> | C/T |
| 46 | PLEKHG5 | p.E786K  | rs184242303  | <b>0.703,P</b> | C/T |
| 47 | ZNF254  | p.K537N  | rs12611425   | <b>0.707,P</b> | G/C |
| 48 | GRIN2C  | p.L65F   | rs78349823   | <b>0.714,P</b> | G/A |
| 49 | MAPKBP1 | p.V386I  | rs75869993   | <b>0.718,P</b> | G/A |
| 50 | TGM5    | p.R81C   | rs773076654  | <b>0.720,P</b> | G/A |
| 51 | HK2     | p.R373W  | rs199992983  | <b>0.728,P</b> | C/T |
| 52 | CDH4    | p.G523S  | rs142900721  | <b>0.729,P</b> | G/A |
| 53 | TRPA1   | p.E179K  | rs920829     | <b>0.739,P</b> | C/T |
| 54 | DNAH1   | p.V3406I | rs201752275  | <b>0.740,P</b> | G/A |
| 55 | CP      | p.T841R  | rs56033670   | <b>0.744,P</b> | G/C |
| 56 | OR51I1  | p.R302C  | rs61736831   | <b>0.745,P</b> | G/A |
| 57 | YY1AP1  | p.D231N  | rs41264945   | <b>0.747,P</b> | C/T |
| 58 | ZNF234  | p.V420I  | rs201556875  | <b>0.747,P</b> | G/A |
| 59 | CPN1    | p.G178D  | rs61751507   | <b>0.764,P</b> | C/T |
| 60 | LILRA1  | p.V387L  | rs116973751  | <b>0.764,P</b> | G/T |
| 61 | SLCO5A1 | p.G594V  | rs34698405   | <b>0.767,P</b> | C/A |
| 62 | FHL2    | p.T171M  | rs727504674  | <b>0.770,P</b> | G/A |
| 63 | OTOP3   | p.M1T    | rs368367098  | <b>0.775,P</b> | T/C |
| 64 | TRPM8   | p.Y251C  | rs17868387   | <b>0.781,P</b> | A/G |
| 65 | CORO2B  | p.L189Q  | rs138122643  | <b>0.781,P</b> | T/A |
| 66 | ZFR2    | p.R521C  | rs61742027   | <b>0.786,P</b> | G/A |
| 67 | CAMK2N2 | p.K47T   | rs1332780006 | <b>0.792,P</b> | T/G |
| 68 | GEMIN5  | p.R1016C | rs61749643   | <b>0.792,P</b> | G/A |
| 69 | CABLES2 | p.V381L  | rs61742254   | <b>0.794,P</b> | C/G |
| 70 | EVC     | p.D95G   | rs41269547   | <b>0.797,P</b> | A/G |
| 71 | KCNMB1  | p.A27V   | rs993115575  | <b>0.797,P</b> | G/A |
| 72 | C2CD2L  | p.S466T  | rs1946807141 | <b>0.805,P</b> | T/A |
| 73 | VTA1    | p.C38S   | rs2232300    | <b>0.812,P</b> | T/A |
| 74 | SLC6A15 | p.E684D  | rs145111717  | <b>0.816,P</b> | C/A |
| 75 | RET     | p.R982C  | rs17158558   | <b>0.818,P</b> | C/T |
| 76 | ALMS1   | p.S2101L | rs28730854   | <b>0.824,P</b> | C/T |
| 77 | ZAN     | p.A2511V | rs76325149   | <b>0.824,P</b> | C/T |
| 78 | IZUMO4  | p.Y137F  | rs45506200   | <b>0.824,P</b> | A/T |
| 79 | PCDHB2  | p.F516L  | rs143150465  | <b>0.826,P</b> | C/A |
| 80 | FOXA1   | p.E269V  | rs757337935  | <b>0.827,P</b> | T/A |

|     |         |          |              |                |     |
|-----|---------|----------|--------------|----------------|-----|
| 81  | OR51B5  | p.T78K   | rs57273781   | <b>0.828,P</b> | G/T |
| 82  | ODF4    | p.R77C   | rs73250854   | <b>0.833,P</b> | C/T |
| 83  | CEP131  | p.A1020T | rs117616373  | <b>0.834,P</b> | C/T |
| 84  | KRT75   | p.M438T  | rs764819403  | <b>0.838,P</b> | A/G |
| 85  | GRWD1   | p.A64V   | rs1971402770 | <b>0.842,P</b> | C/T |
| 86  | SPANXB1 | p.D86H   | rs1218473051 | <b>0.848,P</b> | G/C |
| 87  | PRR22   | p.P248L  | rs34572934   | <b>0.852,P</b> | G/A |
| 88  | DOCK8   | p.R1238H | rs767874435  | <b>0.858,P</b> | G/A |
| 89  | MLH3    | p.R1152C | rs569011240  | <b>0.858,P</b> | G/A |
| 90  | CCDC96  | p.Q231H  | rs374259671  | <b>0.859,P</b> | C/G |
| 91  | SHROOM1 | p.T488N  | rs769565321  | <b>0.859,P</b> | G/T |
| 92  | MYH7B   | p.L1663F | rs1319423309 | <b>0.864,P</b> | C/T |
| 93  | S100P   | p.V14I   | rs187031070  | <b>0.867,P</b> | G/A |
| 94  | OSCAR   | p.C101W  | rs1488511419 | <b>0.870,P</b> | G/C |
| 95  | DHDH    | p.G282R  | rs3765148    | <b>0.871,P</b> | G/A |
| 96  | ARHGEF4 | p.R650C  | rs61758709   | <b>0.872,P</b> | C/T |
| 97  | PLEKHH1 | p.G677R  | rs61534804   | <b>0.872,P</b> | G/A |
| 98  | NLRP3   | p.L331V  | rs202077909  | <b>0.873,P</b> | C/G |
| 99  | COL6A3  | p.E779K  | rs146092501  | <b>0.874,P</b> | C/T |
| 100 | TPSD1   | p.A127V  | rs143993373  | <b>0.876,P</b> | C/T |
| 101 | DUPD1   | p.D66N   | rs11594934   | <b>0.881,P</b> | C/T |
| 102 | TMEM99  | p.L95R   | rs1044806    | <b>0.883,P</b> | T/G |
| 103 | AP5B1   | p.G170V  | rs12362011   | <b>0.885,P</b> | C/A |
| 104 | PNPLA7  | p.W899S  | rs61747535   | <b>0.887,P</b> | C/G |
| 105 | MTDH    | p.A78S   | rs17854373   | <b>0.888,P</b> | G/T |
| 106 | PRKAG1  | p.T89S   | rs1126930    | <b>0.888,P</b> | G/C |
| 107 | OLFML1  | p.T53M   | rs141351486  | <b>0.893,P</b> | C/T |
| 108 | ARHGAP1 | p.G183E  | rs775108640  | <b>0.893,P</b> | C/T |
| 109 | CELSR3  | p.Q331R  | rs1051589441 | <b>0.906,P</b> | T/C |
| 110 | KRT1    | p.A454S  | rs17678945   | <b>0.910,D</b> | C/A |
| 111 | CPA4    | p.A282T  | rs570075096  | <b>0.917,D</b> | G/A |
| 112 | KLLN    | p.R128G  | rs201652303  | <b>0.918,D</b> | G/C |
| 113 | ZNF404  | p.R474C  | rs76311065   | <b>0.918,D</b> | G/A |
| 114 | VASN    | p.G551R  | rs367830549  | <b>0.921,D</b> | G/A |
| 115 | NPAS4   | p.G676V  | rs1371192899 | <b>0.922,D</b> | G/T |
| 116 | INADL   | p.E362A  | rs1286823    | <b>0.926,D</b> | A/C |
| 117 | FARP1   | p.H644Y  | rs61730892   | <b>0.937,D</b> | C/T |
| 118 | KAZN    | p.E88D   | N/A          | <b>0.941,D</b> | A/C |
| 119 | ARFGAP2 | p.S364F  | N/A          | <b>0.943,D</b> | G/A |
| 120 | USP21   | p.G321D  | rs17356051   | <b>0.950,D</b> | G/A |
| 121 | RD3     | p.G57V   | rs767481165  | <b>0.950,D</b> | C/A |
| 122 | EPYC    | p.S150C  | rs17784152   | <b>0.950,D</b> | G/C |
| 123 | ITGAM   | p.R246Q  | rs199671976  | <b>0.950,D</b> | G/A |
| 124 | AARS    | p.G931S  | rs149377346  | <b>0.951,D</b> | C/T |
| 125 | WFS1    | p.R456H  | rs1801208    | <b>0.953,D</b> | G/A |

|     |          |          |              |                |     |
|-----|----------|----------|--------------|----------------|-----|
| 126 | BPIFA3   | p.A41E   | rs17124391   | <b>0.956,D</b> | C/A |
| 127 | NFS1     | p.R145W  | rs148627243  | <b>0.957,D</b> | G/A |
| 128 | PFAS     | p.R811W  | rs147698247  | <b>0.958,D</b> | C/T |
| 129 | IDI1     | p.G12A   | rs4880760    | <b>0.959,D</b> | C/G |
| 130 | TSPAN32  | p.R164C  | rs148601311  | <b>0.959,D</b> | C/T |
| 131 | FFAR3    | p.Y249C  | rs763450506  | <b>0.959,D</b> | A/G |
| 132 | FAM169A  | p.E511K  | rs76455982   | <b>0.960,D</b> | C/T |
| 133 | SLX4     | p.S1271F | rs3810813    | <b>0.960,D</b> | G/A |
| 134 | EXO1     | p.N279S  | rs4149909    | <b>0.961,D</b> | A/G |
| 135 | ACSM1    | p.A176P  | rs61740631   | <b>0.961,D</b> | C/G |
| 136 | HLA-DRB5 | p.K41T   | rs200581589  | <b>0.962,D</b> | T/G |
| 137 | ACACB    | p.D1481V | rs113524436  | <b>0.962,D</b> | A/T |
| 138 | CCDC22   | p.R384C  | rs143790434  | <b>0.963,D</b> | T/T |
| 139 | C6orf118 | p.G271E  | rs17852379   | <b>0.964,D</b> | C/T |
| 140 | TRAPPC5  | p.R7C    | rs753176463  | <b>0.964,D</b> | C/T |
| 141 | FKBP9    | p.V314M  | rs150348129  | <b>0.966,D</b> | G/A |
| 142 | TRPM1    | p.A503V  | rs751743414  | <b>0.966,D</b> | G/A |
| 143 | ADAMTSL4 | p.R87P   | rs199599791  | <b>0.968,D</b> | G/C |
| 144 | ZNF764   | p.R52Q   | rs61744716   | <b>0.968,D</b> | C/T |
| 145 | HMCN1    | p.G1292V | N/A          | <b>0.972,D</b> | G/T |
| 146 | C10orf71 | p.D45G   | rs151171891  | <b>0.974,D</b> | A/G |
| 147 | KIAA0430 | p.Y223H  | rs775204838  | <b>0.974,D</b> | A/G |
| 148 | BAG3     | p.I94F   | rs145393807  | <b>0.975,D</b> | A/T |
| 149 | EPPK1    | p.R1066C | rs116925616  | <b>0.977,D</b> | G/A |
| 150 | C1orf106 | p.Y333F  | rs41313912   | <b>0.978,D</b> | A/T |
| 151 | SCML4    | p.R337W  | rs56215636   | <b>0.978,D</b> | G/A |
| 152 | PKD1L1   | p.E645D  | N/A          | <b>0.978,D</b> | T/A |
| 153 | NUP107   | p.E394G  | rs899872828  | <b>0.978,D</b> | A/G |
| 154 | FSCN2    | p.R406P  | rs750102960  | <b>0.979,D</b> | G/C |
| 155 | VWDE     | p.C1050Y | rs35171886   | <b>0.980,D</b> | C/T |
| 156 | GATAD2A  | p.R293H  | rs748958687  | <b>0.980,D</b> | G/A |
| 157 | NCAPG2   | p.A132V  | N/A          | <b>0.981,D</b> | G/A |
| 158 | IPPK     | p.R130W  | rs75957544   | <b>0.981,D</b> | G/A |
| 159 | PKP1     | p.R684W  | rs61818256   | <b>0.982,D</b> | C/T |
| 160 | SCFD2    | p.G283V  | rs79025139   | <b>0.982,D</b> | C/A |
| 161 | TYSND1   | p.S239R  | rs1166621779 | <b>0.982,D</b> | T/G |
| 162 | MYOM1    | p.E704K  | rs149528866  | <b>0.983,D</b> | C/T |
| 163 | SLC25A5  | p.L173P  | rs200606066  | <b>0.983,D</b> | T/C |
| 164 | SVOPL    | p.I362R  | rs773196860  | <b>0.984,D</b> | A/C |
| 165 | ST8SIA4  | p.S221N  | rs759794120  | <b>0.986,D</b> | C/T |
| 166 | FAM21A   | p.V1285M | rs1427726813 | <b>0.986,D</b> | G/A |
| 167 | EP400    | p.P2792S | rs542350095  | <b>0.986,D</b> | C/T |
| 168 | PDPR     | p.G564S  | rs369641860  | <b>0.986,D</b> | G/A |
| 169 | POLQ     | p.A2547V | rs2306211    | <b>0.987,D</b> | G/A |
| 170 | PDCD4    | p.M401K  | rs201057391  | <b>0.987,D</b> | T/A |

|     |               |          |             |                |     |
|-----|---------------|----------|-------------|----------------|-----|
| 171 | MPHOSPH8      | p.D460Y  | rs75390100  | <b>0.988,D</b> | G/T |
| 172 | VKORC1        | p.D36Y   | rs61742245  | <b>0.988,D</b> | C/A |
| 173 | PMFBP1        | p.E193K  | rs35370634  | <b>0.989,D</b> | C/T |
| 174 | FNDC3B        | p.A452S  | rs35409041  | <b>0.990,D</b> | G/T |
| 175 | CLDN3         | p.P134L  | rs139191328 | <b>0.990,D</b> | G/A |
| 176 | CUBN          | p.N2157D | rs144360241 | <b>0.990,D</b> | T/C |
| 177 | CROCC         | p.D463Y  | rs114323849 | <b>0.991,D</b> | G/T |
| 178 | FBXO39        | p.L231F  | rs1509123   | <b>0.991,D</b> | C/T |
| 179 | LOXHD1        | p.G632C  | rs35088381  | <b>0.991,D</b> | C/A |
| 180 | FAM81B        | p.R134C  | rs76962324  | <b>0.992,D</b> | C/T |
| 181 | ZNF703        | p.P307S  | rs79707182  | <b>0.992,D</b> | C/T |
| 182 | PLEKHA6       | p.A128T  | rs61755454  | <b>0.993,D</b> | C/T |
| 183 | PEX6          | p.A809V  | rs35830695  | <b>0.993,D</b> | G/A |
| 184 | FBLN5         | p.V361I  | rs757825263 | <b>0.993,D</b> | C/T |
| 185 | MYH13         | p.R1438C | rs141961168 | <b>0.993,D</b> | G/A |
| 186 | FER1L5        | p.R1523Q | rs745681758 | <b>0.994,D</b> | G/A |
| 187 | MRI1          | p.T209R  | rs141252695 | <b>0.994,D</b> | C/G |
| 188 | TMF1          | p.D798H  | rs1532918   | <b>0.995,D</b> | C/G |
| 189 | DCK           | p.P122S  | rs67437265  | <b>0.995,D</b> | C/T |
| 190 | APLF          | p.Q433K  | rs36021078  | <b>0.996,D</b> | C/A |
| 191 | TTC21A        | p.R574W  | rs35581078  | <b>0.996,D</b> | C/T |
| 192 | TCP10L2       | p.G254R  | rs200019718 | <b>0.996,D</b> | G/A |
| 193 | SVEP1         | p.E3412Q | rs145193955 | <b>0.996,D</b> | C/G |
| 194 | OR1N2         | p.F194L  | rs41297203  | <b>0.996,D</b> | T/C |
| 195 | A2ML1         | p.I1054T | rs371117844 | <b>0.996,D</b> | T/C |
| 196 | RNF40         | p.L261F  | rs150097902 | <b>0.996,D</b> | C/T |
| 197 | CD300C        | p.T71I   | rs11870245  | <b>0.996,D</b> | G/A |
| 198 | CATSPERD      | p.E596D  | rs143660393 | <b>0.996,D</b> | G/C |
| 199 | MATN3         | p.E252K  | rs52826764  | <b>0.997,D</b> | C/T |
| 200 | OGG1          | p.N151I  | rs764308935 | <b>0.997,D</b> | A/T |
| 201 | USP19         | p.V872A  | N/A         | <b>0.997,D</b> | A/G |
| 202 | FAM65B        | p.W15R   | rs148823241 | <b>0.997,D</b> | A/G |
| 203 | HLA-DRB5      | p.L28F   | rs72508462  | <b>0.997,D</b> | C/G |
| 204 | OR2AG2        | p.G233R  | rs143018775 | <b>0.997,D</b> | C/T |
| 205 | DNAH10        | p.T1986M | rs33935373  | <b>0.997,D</b> | C/T |
| 206 | SLC25A5       | p.G183V  | rs200974395 | <b>0.997,D</b> | G/T |
| 207 | OR10X1        | p.T90M   | rs77690058  | <b>0.998,D</b> | G/A |
| 208 | UGT2A2,UGT2A1 | p.S444Y  | rs144056072 | <b>0.998,D</b> | G/T |
| 209 | IGF2R         | p.R292Q  | rs370150079 | <b>0.998,D</b> | G/A |
| 210 | BMS1          | p.R939G  | rs779750824 | <b>0.998,D</b> | C/G |
| 211 | TRPM5         | p.V335L  | rs34350821  | <b>0.998,D</b> | C/A |
| 212 | OR51I2        | p.R263C  | rs75620804  | <b>0.998,D</b> | C/T |
| 213 | TAS2R31       | p.D45H   | rs143614038 | <b>0.998,D</b> | C/G |
| 214 | CRAMP1        | p.P1084S | rs61746451  | <b>0.998,D</b> | C/T |
| 215 | FADS6         | p.V256I  | rs7219093   | <b>0.998,D</b> | C/T |

|          |              |           |              |         |     |
|----------|--------------|-----------|--------------|---------|-----|
| 216      | DOPEY2       | p.R2055C  | rs145488940  | 0.998,D | C/T |
| 217      | HIVEP3       | p.P407T   | rs41269477   | 0.999,D | G/T |
| 218      | IL23R        | p.R381Q   | rs11209026   | 0.999,D | G/A |
| 219      | PVRL4        | p.P104T   | rs35434391   | 0.999,D | G/T |
| 220      | CAPN8        | p.A136V   | rs71644745   | 0.999,D | G/A |
| 221      | TTN          | p.Y13023H | rs775496863  | 0.999,D | A/G |
| 222      | ESPNL        | p.L866Q   | N/A          | 0.999,D | T/A |
| 223      | SNED1        | p.S270Y   | rs201554730  | 0.999,D | C/A |
| 224      | CDC25C       | p.G375R   | rs11567997   | 0.999,D | C/G |
| 225      | DLGAP2       | p.T375M   | rs767514905  | 0.999,D | C/T |
| 226      | ITGB1        | p.I782F   | N/A          | 0.999,D | T/A |
| 227      | AVPI1        | p.L36R    | rs11556392   | 0.999,D | A/C |
| 228      | OR51B5       | p.R88G    | rs57900141   | 0.999,D | T/C |
| 229      | RTN3         | p.D501H   | rs7936660    | 0.999,D | G/C |
| 230      | KRTAP3-2     | p.P53L    | rs150830376  | 0.999,D | G/A |
| 231      | TSEN54       | p.P483A   | rs62088470   | 0.999,D | C/G |
| 232      | ANKLE1       | p.R548Q   | rs77683348   | 0.999,D | G/A |
| 233      | SYNGR4       | p.R27W    | rs919804     | 0.999,D | C/T |
| 234      | EPHA10       | p.G187R   | rs912259721  | 1.000,D | C/G |
| 235      | ERICH3       | p.G319R   | rs140864337  | 1.000,D | C/G |
| 236      | SCN11A       | p.L1158P  | rs141686175  | 1.000,D | A/G |
| 237      | IGSF10       | p.D2614N  | rs112889898  | 1.000,D | C/T |
| 238      | PDHA2        | p.R286P   | rs147966234  | 1.000,D | G/C |
| 239      | PCDHA1       | p.N449H   | rs3733712    | 1.000,D | A/C |
| 240      | SCML4        | p.G158D   | rs142985964  | 1.000,D | C/T |
| 241      | CFTR         | p.R668C   | rs1800100    | 1.000,D | C/T |
| 242      | FER1L6       | p.G943W   | rs200894396  | 1.000,D | G/T |
| 243      | ACTL7A       | p.G214S   | rs41278347   | 1.000,D | G/A |
| 244      | MUSK         | p.A763T   | rs199507468  | 1.000,D | G/A |
| 245      | FANK1        | p.P12L    | rs17153879   | 1.000,D | C/T |
| 246      | UBASH3B      | p.Y546C   | rs1428664827 | 1.000,D | A/G |
| 247      | GOLGA3       | p.G608C   | rs768043775  | 1.000,D | C/A |
| 248      | GMPR2        | p.G260D   | rs34354104   | 1.000,D | G/A |
| 249      | ARRDC4       | p.T235M   | rs61747226   | 1.000,D | C/T |
| 250      | ATP2C2       | p.G809W   | rs141229929  | 1.000,D | G/T |
| 251      | OR1D2        | p.T240I   | rs4300683    | 1.000,D | G/A |
| 252      | LOXHD1       | p.G626C   | rs34589386   | 1.000,D | C/A |
| Stopgain |              |           |              |         |     |
| 253      | AMZ1         | p.R292X   | rs55919423   | 1.000,D |     |
| 254      | CEP295       | p.L2557X  | rs980660332  | 1.000,D |     |
| 255      | DHDH         | p.Q233X   | rs10423255   | 1.000,D |     |
| 256      | KIAA1755     | p.R510X   | rs41282820   | 1.000,D |     |
| 257      | KRT38        | p.Q235X   | rs148768443  | 1.000,D |     |
| 258      | LILRA1       | p.G261X   | rs150508449  | 1.000,D |     |
| 259      | LOC100132146 | p.R46X    | rs148870990  | 1.000,D |     |

|          |         |         |              |                |  |
|----------|---------|---------|--------------|----------------|--|
| 260      | LRRD1   | p.E329X | rs200099667  | <b>1.000,D</b> |  |
| 261      | NTHL1   | p.Q90X  | rs150766139  | <b>1.000,D</b> |  |
| 262      | PSTK    | p.C181X | rs1848991631 | <b>1.000,D</b> |  |
| 263      | SIGLEC1 | p.E88X  | rs150358287  | <b>1.000,D</b> |  |
| 264      | TEX51   | p.R72X  | rs61730220   | <b>1.000,D</b> |  |
| 265      | TTLL3   | p.R704X | rs115917139  | <b>1.000,D</b> |  |
| 266      | ZNF283  | p.Y599X | rs756423061  | <b>1.000,D</b> |  |
| Stoploss |         |         |              |                |  |
| 267      | ZBP1    | p.X249L | rs1267733750 | <b>1.000,D</b> |  |
